# PLOS ONE

## How do dairy farmers wish their future farm?

--Manuscript Draft--

|                               |                                                                                                                                                                                                                                                                                                                                                                                                                                                                                                                                                                                                                                                                                                                                                                                                                                                                                                                                                                                                                                                                                                                                                                                                                                                                                                                                                                                                                                                                                                                                                                                                                                                                                                                                                                                                                                                                                                                                                                                                                                                                                                                                                                                                                                                                                    |
|-------------------------------|------------------------------------------------------------------------------------------------------------------------------------------------------------------------------------------------------------------------------------------------------------------------------------------------------------------------------------------------------------------------------------------------------------------------------------------------------------------------------------------------------------------------------------------------------------------------------------------------------------------------------------------------------------------------------------------------------------------------------------------------------------------------------------------------------------------------------------------------------------------------------------------------------------------------------------------------------------------------------------------------------------------------------------------------------------------------------------------------------------------------------------------------------------------------------------------------------------------------------------------------------------------------------------------------------------------------------------------------------------------------------------------------------------------------------------------------------------------------------------------------------------------------------------------------------------------------------------------------------------------------------------------------------------------------------------------------------------------------------------------------------------------------------------------------------------------------------------------------------------------------------------------------------------------------------------------------------------------------------------------------------------------------------------------------------------------------------------------------------------------------------------------------------------------------------------------------------------------------------------------------------------------------------------|
| <b>Manuscript Number:</b>     | PONE-D-19-26278R2                                                                                                                                                                                                                                                                                                                                                                                                                                                                                                                                                                                                                                                                                                                                                                                                                                                                                                                                                                                                                                                                                                                                                                                                                                                                                                                                                                                                                                                                                                                                                                                                                                                                                                                                                                                                                                                                                                                                                                                                                                                                                                                                                                                                                                                                  |
| <b>Article Type:</b>          | Research Article                                                                                                                                                                                                                                                                                                                                                                                                                                                                                                                                                                                                                                                                                                                                                                                                                                                                                                                                                                                                                                                                                                                                                                                                                                                                                                                                                                                                                                                                                                                                                                                                                                                                                                                                                                                                                                                                                                                                                                                                                                                                                                                                                                                                                                                                   |
| <b>Full Title:</b>            | How do dairy farmers wish their future farm?                                                                                                                                                                                                                                                                                                                                                                                                                                                                                                                                                                                                                                                                                                                                                                                                                                                                                                                                                                                                                                                                                                                                                                                                                                                                                                                                                                                                                                                                                                                                                                                                                                                                                                                                                                                                                                                                                                                                                                                                                                                                                                                                                                                                                                       |
| <b>Short Title:</b>           | Ideal future dairy farms to ensure revenue                                                                                                                                                                                                                                                                                                                                                                                                                                                                                                                                                                                                                                                                                                                                                                                                                                                                                                                                                                                                                                                                                                                                                                                                                                                                                                                                                                                                                                                                                                                                                                                                                                                                                                                                                                                                                                                                                                                                                                                                                                                                                                                                                                                                                                         |
| <b>Corresponding Author:</b>  | Anne-Catherine Dalcq<br>Universite de Liege Gembloux Agro-Bio Tech<br>Gembloux, BELGIUM                                                                                                                                                                                                                                                                                                                                                                                                                                                                                                                                                                                                                                                                                                                                                                                                                                                                                                                                                                                                                                                                                                                                                                                                                                                                                                                                                                                                                                                                                                                                                                                                                                                                                                                                                                                                                                                                                                                                                                                                                                                                                                                                                                                            |
| <b>Keywords:</b>              | Dairy farming systems; future; producers; reasons; environment; climatic hazard; formation                                                                                                                                                                                                                                                                                                                                                                                                                                                                                                                                                                                                                                                                                                                                                                                                                                                                                                                                                                                                                                                                                                                                                                                                                                                                                                                                                                                                                                                                                                                                                                                                                                                                                                                                                                                                                                                                                                                                                                                                                                                                                                                                                                                         |
| <b>Abstract:</b>              | <p>Dairy farming systems are evolving. This study presents dairy producers' perceptions of their ideal future farm ( IFF ) to ensure revenue, and attempts to determine the reasons for this choice, the environmental aspects related to this choice, the proximity between the current farm and the IFF and the requirements for reaching this IFF. Just before the end of the European milk quota, a total of 245 Walloon dairy producers answered a survey about the characteristics of their IFF and other socio-environmental-economic information. A multiple correspondence analysis ( MCA ) was carried out using seven characteristics of the IFF (intensive vs. extensive, specialised vs. diversified, strongly vs. weakly based on new technologies, managed by a group of managers vs. an independent farmer, employed vs. familial workforce, local vs. global market, standard vs. quality-differentiated production) to observe the relationships between them. Based on the main contributors to the second dimension of the MCA, this axis was defined as an IFF gradient between the local-based extensive ( LBE ) producers (26%) and the global-based intensive ( GBI ) producers (46%). The differences of IFF gradient between modalities of categorical variables were estimated using generalised linear models. Pearson correlations were calculated between the scores on the IFF gradient and quantitative variables. Finally, frequencies of IFF characteristics and the corresponding characteristic for the current situation were calculated to determine the percentages of "unhappy" producers. Some reasons for the choice of IFF by the producers have been highlighted in this study. Environmental initiatives were more valued by LBE than GBI producers. Low similarity was observed between the current farm situation of the respondents and their IFF choice. LBE and GBI producers differed significantly regarding domains of formation (technical and bureaucratic vs. transformation and diversification respectively) and paths of formation (non-market vs. market respectively). Two kinds of farming systems were considered by dairy producers and some socioeconomic and environmental components differed between them.</p> |
| <b>Order of Authors:</b>      | <p>Anne-Catherine Dalcq</p> <p>Thomas Dogot</p> <p>Yves Beckers</p> <p>Yves Brostaux</p> <p>Eric Froidmont</p> <p>Frédéric Vanwindekens</p> <p>Hélène Soyeurt</p>                                                                                                                                                                                                                                                                                                                                                                                                                                                                                                                                                                                                                                                                                                                                                                                                                                                                                                                                                                                                                                                                                                                                                                                                                                                                                                                                                                                                                                                                                                                                                                                                                                                                                                                                                                                                                                                                                                                                                                                                                                                                                                                  |
| <b>Response to Reviewers:</b> | <p>All these elements are in the document : Response to reviewers.<br/>Sincerely,<br/>Anne-Catherine Dalcq<br/>Dear Academic Editor, dear Reviewers,<br/>First, I would like to thank you for the time spent to improve the understanding of this manuscript. This letter is organized in two parts. The first part deals with the main issue of the review (i.e., the method mobilized, which corresponds to the point raised by the</p>                                                                                                                                                                                                                                                                                                                                                                                                                                                                                                                                                                                                                                                                                                                                                                                                                                                                                                                                                                                                                                                                                                                                                                                                                                                                                                                                                                                                                                                                                                                                                                                                                                                                                                                                                                                                                                          |

academic editor and one remark of the reviewer). The second part concerns the specific answers to the specific remarks formulated by the reviewers.

Sincerely,

Anne-Catherine Dalcq

1/ Methodology

Please read carefully the propositions of reviewer #2 especially about the recommendations you did not take into account in your revision. I am afraid the reviewer is right about the interest of LCA vs MCA, as we expect a characterization of different profiles of dairy farmers.

But my proposition is that instead of LCA, you use HCPC (Hierarchical Clustering on Principal Components) which is a natural and standard extension of MCA (see Arguelles et al. 2014, Kassambara 2017 or the following technical report

[http://factominer.free.fr/more/HCPC\\_husson\\_josse.pdf](http://factominer.free.fr/more/HCPC_husson_josse.pdf)).

H. Soyeurt :

Dear Editor,

Dear Reviewers,

Instead of my PhD student, Miss Anne-Catherine Dalcq, I would like to answer to the question related to the methodology used in this study. I am Professor H el ene Soyeurt and I teach courses related to Data Mining and Machine Learning at Gembloux Agro-Bio Tech (University of Li ge). Therefore, I have an experience in the use of multivariate analysis. It is why I would like to answer by myself to the question related to the method used in this article.

Before starting an explanation, I would like to precise that we have not really understood the comments of the reviewer about Latent Class Analysis (LCA) because the objective was not to create groups of farmers. Indeed, and this is the innovative aspect of this paper, a gradient between two quite different models of farms was studied. The gradient is really important because it appears to us simplistic to classify farmers in only 2 groups, working with a gradient allowed us to nuance the position of the dairy producers and to analyze more precisely the link between this position and other characteristics. The use of the gradient allows studying the trend of a farmer. It is why in this paper, we always mention "tend towards" to make a reference to the position on the gradient and not a binary choice of a model.

As we did not want to create farmer's clusters, LCA was not appropriate as well as HCPC. However, as asked by the second reviewer to prove the robustness of our approach, we have decided to show you the similarities and the extended work that it is possible to do using Multiple Correspondence Analysis (MCA) and LCA. Indeed, it is also possible to use LCA to create a gradient instead of using the clusters.

So, I would like to remind the methodology that we have proposed in this study (see the figure below, Fig 1)). Again, MCA was used to observe the relationships between the seven studied variables. Based on the interpretation of MCA dimensions, we have observed that the second dimension represented the positioning between the two models for a dairy farm. Therefore, the score for this dimension for a specific producer allows to know its perception of ideal future farm between the two extreme models. This gradient allows avoiding to limit the farm typology to 2 clusters. This is interesting because many farmers combined some approaches specific to one model of farms (no more intensification but extensification, local-based market) or another one (global-based market, continuously improvement of the productivity thanks to, notably, intensification, ...). Therefore, wishing to split the dairy farmers into 2 groups is too limitative. Some farmers remain between these two models (Fig 2), some farmers are more convinced than others by a model. Farmers showing higher scores are really convinced by GBI model, farmers showing lower but positive scores choose GBI model but are not 100% in this way of farm development. Negative scores express the position of farms in favor of LBE model, the lowest scores reflected pronounced adhesion to this model. It is why the gradient as proposed in this paper was useful and seem to us the most interesting tool to represent dairy producers.

Figure 1 Methodology

Figure 2 Distribution of the producers (the "with an opinion" ones) along the second dimension of the MCA

Similarly, we have done this job using LCA methodology as requested by the reviewer#2. LCA allows defining clusters from the dataset. In this case and to be in line with the study objective, we have decided to create 3 clusters. Moreover, based on the AIC and BIC values, it was also the best model (Fig 3). LCA allows us to create those 3

clusters. After the interpretation of defined clusters, it appeared that we have a cluster representing “No opinion” responders, one cluster representing “global-based intensive” (GBI) farmers and one cluster representing “local-based extensive” (LBE) farmers (Fig 4). Therefore, those clusters were similar to the ones obtained by combining MCA and Ward clustering (=HCPC method) as done to clean the dataset (i.e., extract responders with “no opinion” behavior). Again, we did not want to use those clusters to make our analysis. But, using this methodology, it is possible to obtain a probability to belong to a specific cluster. Therefore, we have decided to compare the gradient as defined in the current study to the probability to belong to the LBE or GBI clusters defined using the LCA method.

So, now, it is time to present you the results. I will not present you the results about MCA as those results are reported in the article. In this paragraph, we will focus on the LCA results. As we used categorical variables which are not ordinal, we have decided to use the polytomous latent class analysis. The variables used, called manifest variables, were the same than the one used for MCA. The modalities for each variable were recoded from 1 to 3:

Intensification: 1. Intensive, 2. Extensive, 3. No opinion

Number of activities: 1. Specialised, 2. Diversified, 3. No opinion

Technology: 1. Strongly based on new technologies, 2. Weakly based on new technologies, 3. No opinion

Workforce: 1. Familial workforce, 2. Employed workforce, 3. No opinion

Kind of management: 1. Group of farmers management, 2. Independent farmer management, 3. No opinion

Market: 1. Global market, 2. Local market, 3. No opinion

Milk quality: 1. Standard quality milk, 2. Differentiated quality milk, 3. No opinion

As this clustering is very sensitive to the prior values used to start the iteration, 10 repetitions were used to provide you the final results for all models. All calculations were done with R software and more specifically the package *poLCA*. First, we have run different LCA models using a different number of classes (clusters). We have tested models from 1 to 10 classes and then we have estimated the AIC and BIC criteria to observe which model allowed the best fitting. The results of AIC and BIC for all models are presented in the figure below (Fig 3). From this figure, we can conclude that the model allowing the creation of 3 classes is a good compromise between BIC and AIC (i.e., the lowest BIC and AIC values).

#### Figure 3 AIC & BIC criteria values

The figure below shows you the clusters defining by the model allowing a discrimination of the data into 3 clusters (Fig 4). This figure represents the probability to have a specific modality for each cluster. So, based on those results, we can conclude that the first clustering (class 1) is related to GBI dairy producers, the second cluster (class 2) is related to LBE dairy producers and the last cluster (class 3) is related to the dairy producers with “no opinion”.

#### Figure 4 Description of the three clusters obtained by LCA method

Therefore, in order to clean the dataset (i.e., delete records from farmers having many “no opinion” views), we can use the clustering 3. This process is similar to the MCA + Ward clustering (HCPC) proposed in the manuscript. Again, we did not want to use clusters but we want to use a gradient. For MCA, this gradient was the second MCA dimension. In the context of LCA, this gradient can be derived from the probability to belong to class 1 (“GBI producer”) or class 2 (“LBE producer”). So, to show the robustness of the MCA approach used, we calculated the correlation between those probabilities and the score of the second MCA dimension (called gradient in the manuscript). The correlation between the probability to belong to class 1 and the gradient was equal to 0.83. The correlation between the probability to belong to class 2 and the intensification gradient was equal to -0.87. The correlation between the 2 probabilities was equal to -0.97.

From all of those results, you can see that the relationship is strong between MCA and LCA using an innovative approach focusing on the score/probability of an individual and not directly to a cluster. Using only the second dimension of MCA, we can reflect both clusters (class 1 and class 2) simultaneously. Indeed, the second dimension is a gradient “GBI-LBE” and included both. This is really interesting to observe the relationships between this gradient and other quantitative or qualitative variables as now the studied trait is quantitative. It allows to see if a modality of a categorical

variable is the choice of really convinced GBI dairy producers or dairy producers only sticking out of the GBI model.

I hope that this demonstration illustrates well the relevancy of the approach proposed in our paper. A sentence will be added in the materials and methods section to explain why LCA was not used. Moreover, some articles exist also in the literature to prove the mathematical relationships between MCA and LCA (e.g., Lautsch and Plichta, Psychology Science 2003:298-323 as well as Van der Heijden, et al., Sociological methodology 1999).

The fact that the two dimensions explained almost 95% of the variability and that all the modalities representing an opinion positioning themselves along the second dimension support us to take the second dimension as gradient, after deletion of the No-opinion producers which were discriminated by the first dimension.

Finally, I would like to acknowledge you for the great job done in the review of this paper. The manuscript was improved a lot.

Sincerely,

Prof H el ene Soyeurt

PS : The answers to all other comments were done by Anne-Catherine Dalcq.

2/ Others comments

Reviewer #2: In this revision, the authors have significantly improved the English language translation and clarified their research questions, but they have failed to address the shared concerns of reviewers regarding methods and clarity of writing. They have not adequately addressed the substance of the comments from reviewers. Regarding methods, the reviewers still do not offer a compelling and clear justification for why MCA is appropriate for their goals and they do not offer the latent class analysis that I suggested or the hierarchical clustering (related) suggested by reviewer 3 as alternatives or robustness checks. MCA, while performed adequately, is not well suited to the way they discuss their results. They continually refer to "types" of respondents, which is what latent class analysis is for. MCA is about identifying clustering of variables, not clusters of respondents. All of their interpretation of results is about clustering and patterns of PEOPLE, not variables. This indicates a significant misalignment between the method and the research goals.

A-C Dalcq: First, we would like to thank you for the deep reading done on this article and for your formulated comments. We missed your request to test the robustness of our method with other ones. We apologize for this mistake. You will find our work of comparison with LCA method in the first part of this letter. In the article, we speak about producers tending towards "GBI" or "LBE" models to express the results coming from the use of our gradient. Indeed, MCA is a method to identify relationships between variables but is also suitable to make groups of individuals thanks to the use of its extension HCPC, as proposed by the academic editor. A detailed information about the comparison of MCA and LCA is now given in the first part of this letter.

The authors do not adequately discuss the two dimensions of the MCA (figure 1) and the axes are not adequately labeled. It is not made clear why the second dimension is retained.

A-C Dalcq: We added some information. The updated explanations of the two dimensions are taken up just after (Lines 254-261/286-306/339-343). Do you need more information? If it is the case, could you guide us?

Remark : Lines specified throughout this letter are those of the revised manuscript with track changes.

The axes are labeled as the figure is provided by SAS 9.4. We precised its meaning thanks to the caption and the following interpretation.

Explanations of the two dimensions:

Lines 254-261: "The first dimension of MCA showed positive relationships with the modalities no opinion of each characteristic and negative relationships with all the modalities representing an opinion. Thus, the first dimension of the MCA allowed permitted differentiation between the producers who did not give their opinion concerning characteristics of IFF and the producers who did (Fig 1). Cluster analysis was used to isolate the group of producers with a lot of 'no opinion' answers to the seven questions: this formed the first separation of classes of the analysis, dividing the "no-opinion" producers (15%) from the others (85%)."

Lines 286-306: "The second dimension of the MCA showed positive relationships with some modalities of the IFF characteristic and negative relationships with their opposite. Thus, this dimension seems was the most interesting for highlighting to highlight the wishes of dairy farmers about their IFF, for those who took a position on this question.

More precisely, this axis showed a gradation of question modalities and proximity between several characteristics. This dimension led to the identification of two extreme tendencies (Fig 1); the modalities of familial workforce, independent farmer management and management by a group of farmers were near to zero on this axis (Fig 1). This means that the small proportion of producers supporting group management was distributed between the two extreme tendencies observed. The position of the modalities of familial workforce and independent farmer at the middle of the second dimension illustrated the fact that these modalities were chosen by producers from the two tendencies identified. The small proportion of producers choosing an employed workforce was positioned at the top of the second dimension (Fig 1).”

“The first tendency, related to high scores on the second MCA dimension, corresponds to IFF with the following characteristics: global market, standard milk, intensive system, employed workforce, specialised and strongly based on new technologies.”

Lines 339-343: “The second tendency, contrary to the first tendency, was characterised by negative scores on the second MCA dimension. This axis was represented by the following modalities: weakly based on new technologies, diversified, differentiated quality milk, local market and extensive system (Fig 1). This reflects another form of dairy farming. »

Reason of the use of the second dimension:

Lines 379-384: “To study the relationships between the different IFF, the reasons for these and other interesting technico-economic information, the second dimension was considered as a gradient (IFFg) interpreted at the extremities as global-based intensive producers (GBI: high positive scores) and local-based extensive producers (LBE: high negative scores). The choice to work with a gradient rather than a clear separation of the two tendencies was motivated by the will to not put dairy producers into boxes pigeonholes”

While the authors have provided a link to the survey online, that link is only in French and requires registration with an email address before it can be viewed, so that is not adequate. The authors still have not addressed the real concern that I raised in my previous review: they need to be clear about how they measured their concepts (intensive/extensive, etc.), what specific survey questions were used, and how those variables were coded. A clear list of questions for each concept and the coding for each is needed. For instance, in Table 2, it is not clear what specific survey questions or variables represent these concepts and how those variables were actually coded.

A-C Dalcq: In the current version, we have added an annex (Appendix 1) with the translation of the questions mobilized in the paper. Given the length of the survey, we provided only the questions raised in the present paper. Some information are mentioned at lines 129-136 about the questions related to the ideal future farm characteristics (intensive vs. extensive,...), the way of measurement for our developed concepts. If you need more information, could you precise them to us explicitly ?

Lines 129-136: “The entire survey was composed of 127 questions where the answers were decomposed into 498 categorical and 44 quantitative variables. The question ‘Without taking into account your current farm, what is, according to you, the ideal future farm to ensure a revenue?’ was proposed to the producers and they must could choose between short propositions on seven items: 1) intensive or extensive production; 2) specialised or. diversified activity (or activities); 3) farming strongly or weakly based on new technologies; 4) farm managed by an independent farmer or a group of managers; 5) family or employed workforce; 6) providing production for local or global markets; 7)providing standard or differentiated quality production. The modality “no opinion” was available for each IFF question.”

The authors still do not address response rate for the survey. They do now address representativeness of their respondents for this specific region, but they have not addressed the bigger questions of representativeness: how does this one region in one nation represent that nation, Europe, and/or agriculture broadly?

A-C Dalcq: The response rate of 6,1% was already precised in the past manuscript. You can find it at lines 200-201 of the current text.

Lines 200-201 : “The sample set of 245 producers represented 6.1% of the dairy producers in Wallonia (about 4,000 dairy producers in 2015 and 3,500 in 2017 (STATBEL, 2019)).”

For the second part of your comment, do you want that we precise that the Walloon Region is one of the two regions of Belgium, which is one of the 27 members countries

of the European Union? If yes, the proposal could be : “The Walloon Region is one of the two regions of Belgium, which is one of the 27 members countries of the European Union”.

Or do you want that we precise the number of dairy producers in Belgium and in the European Union? The International Dairy Federation mentions 9,674 dairy farms in Belgium and 1,130,700 farms with a dairy activity in the European Union (Confédération Belge de l’Industrie Laitière, 2020). The number of Walloon dairy farms is obviously low amongst all of these countries. We do not know if all this information is relevant to be written in the manuscript.

Complete reference: Confédération Belge de l’Industrie Laitière. 2020. Rapport Annuel 2020.

The goal of this paper is to inform about the position of dairy producers of a region, which is moreover quite heterogeneous regarding the geopedologic conditions (lines 205-206), this one can represent the context and the resources of other producers in Europe. The goal was not to give a complete vision of all the European producers, which needs higher means.

In all tables the n, or respondent totals, should be clear.

A-C Dalcq: We added a sentence at lines 395-396 :“These analysis were conducted on the producers who have an opinion (N = 207).” And the N was precised and added in each table. Thanks for this remark which brings clarity throughout all the paper.

For Table 5 there are subscripts/footnotes that are never defined or labeled.

A-C Dalcq: The subscripts are now precised in each table. “Means with different letters are significantly different.”. Thanks for this remark.

For Tables 3 and 4, no significance tests are reported.

A-C Dalcq: Indeed, the goal was not to test the differences between the no-opinion producers and all the sample but to give an idea of the characteristics of the No-opinion producers. Reviewer#3 asked us to give all of this information also for producers with an opinion. We realized ANOVA tests between the no-opinion producers and the producers with an opinion (lines 280-284)

The interpretation of the MCA results is circular logic. They define the clusters based on variables such as the attitude toward technology and then present a finding that people who are in the “pro-technology” GBI cluster have more positive attitudes towards technology. Of course, that is how you defined the scale in the first place.

A-C Dalcq: The variable “technology” is “Mechanisation and robotisation : help for workload and administrative aspects “ and is present in the part “Reasons”. This result is presented to explain one reason of the producers tending towards “GBI-model” to tend to this model and one of its component, the technology. We have better precised our idea by adding the sentence: “We observed that the wish of technology of producers tending towards GBI model can be explained by the fact that they considered it as help for workload.” at lines 534-536.

Regarding writing, the presentations of results and its mixing with discussion of existing literature is still extremely unclear and difficult to follow. Both reviewer 1 and myself raised this critique: presenting your results intermingled with other literature is difficult to read and makes it unclear what your key findings are. This is not about the technical requirements of the journal. In its current presentation, readers cannot easily identify what your key findings are in each subsection and it is very difficult to read. For instance, in the section on pages 15-16, the authors spend substantially more time discussing other studies than they do their own results.

A-C Dalcq: As already mentioned and visible at lines 304-364 in the revised paper, the explanations based on the findings of other past studies help to explain the relationships observed between the modalities of the seven ideal future farm characteristics.

The introduction is improved, but still weak. The first paragraph is overly general and does nothing to build the focus of the paper. The authors also spend too much time asserting the contribution of their study before they have even reviewed the literature or told us what their analysis will be.

A-C Dalcq: What could be your expectations about the structure of this introduction? As the reviewer#3 did not make comments about the redaction of this part and without

deeper expectations from your, the structure of the introduction was not changed.

The attempts to incorporate new literature are cursory.

A-C Dalcq: The work of Mr Mooney was consulted and two references was added to the paper (lines 236-238, lines 577-580). Did you expect references to more elements of his work? Could you precise which ones? Moreover, we also investigated the phenomenon of bifurcation. Literature about bifurcation was mainly found for the organic activity. We consulted a Professor with skills in sociology, Prof Kevin Maréchal, of Gembloux Agro-Bio Tech-University of Liège (Belgium), who provided us also this literature reference. Do you have other literature to advice to me?

The paper is not appropriately written for a general audience. They assume too much prior knowledge from readers regarding methods both methods and the case.

A-C Dalcq: We have now added information about the choice of the method between MCA and LCA, and about the method WARD (regarding a following remark). We hope that it brings the missing information. If this information is not complete for you, could you precise us explicitly the requested information?

Lines 165-170: "This method was chosen instead of the creation of classes, possible with the Latent Class Analysis method or the Numerical Classification on the scores of MCA (Hierarchical Clustering on Principal Components). This choice was motivated by the wish to not put the producers in boxes but study their position on a gradient between potential extreme models identified along the dimension."

Lines 153-156 : "The WARD method is a hierarchical agglomerative method (Everitt et al., 2011). The principle of this kind of method is to put initially the n individuals in n groups and then to agglomerate the groups. The algorithm of WARD makes it in such a way that the gatherings induce the lowest decrease of R2 at each step."

Overall, the authors have inadequately addressed the careful feedback of the reviewers and made inadequate improvements. Throughout the response to reviewers they reject several important critiques with no justification of their rejection.

A-C Dalcq: We recognized that we do not explain the choice of the method and we do not test its robustness with statistic treatments. We apologized for that. We missed this request. We realized this analysis at this time.

A number of specific points are highlighted below:

Line 79- How was that ensured (respondent producers were asked not to take into account their current farm when considering their IFF)?

A-C Dalcq: It is now precised in the Materials and methods section (Lines 131-134). Thanks for your remark.

Lines 131-134 : The question "Without taking into account your current farm, what is, according to you, the ideal future farm to ensure a revenue?" was proposed to the producers and they must choose between short propositions on seven items: 1) intensive or extensive production; 2)[...]"

Line 121- survey link not accessible without registering. Include in appendix?

A-C Dalcq: The appendix is realized and available in the new submission.

Line 146- What is WARD?

A-C Dalcq: We added sentences of explanation about the Ward method at lines 153-156. It is a hierarchical agglomerative method of Numerical classification.

Lines 153-156: "The WARD method is a hierarchical agglomerative method (19). The principle of this kind of method is to put initially the n individuals in n groups and then to agglomerate the groups. The algorithm of WARD makes it in such a way that the gatherings induce the lowest decrease of R2 at each step."

Line 145- What are "particular characteristics" beyond no-opinion profiles?

A-C Dalcq: We replaced particular by "some" (Lines 151). We hope it makes it clearer.

Line 157- What?

A-C Dalcq: This sentence is a part of the method. As explained and precised before, we realized a MCA on the seven ideal future farm questions. We observed that the

modalities “no-opinion” of the seven questions gathered and were positively related with the first dimension of the MCA. All the modalities reflecting an opinion were negatively related to the first dimension. Thus, the first dimension allowed to differentiate the producers with an opinion or not.

The modalities “intensive”, “global-market”, “specialized”, “standard quality milk”, “employed workforce” and “strongly based on new technologies” gathered and were positively related to the second dimension. The modalities “extensive”, “local-market”, “diversified”, “quality differentiated milk” and “lowly based on new technologies” gathered and were negatively related to the second dimension. The second dimension appeared to us as a gradient between the two extreme models of ideal future farm “Global-based intensive” and “Local-based extensive”.

The two dimensions explained almost 95% of the variability of the dataset. Therefore, the study of only these two dimensions appeared to us relevant. Then, we realized a numerical classification on the scores on the two dimensions of the MCA (statistic treatment equivalent to HCPC- Hierarchical Clustering on Principal Components). The first two groups created were the “no-opinion” producers and the producers “with an opinion”. This allowed us to exclude the “no-opinion” producers and to study the producers with an opinion thanks to the second dimension, this one had at its extremities the “Local-based extensive model” and the “Global-based intensive model”. But the producers with an opinion distributed themselves along this dimension. Thus, we decide to work with the second dimension, as a gradient of ideal future farm (Fig 5).

Then we want to study the relationships between this ideal future farm gradient and the other information present in the survey.

The relationships between the ideal future farm gradient and the categorical variables of the survey were studied thanks to generalized linear models.

The gradient was the y, the variable to explain. The modalities of the categorical variables were the fixed effect of the generalized linear model, the factors explaining.

$y = \text{effect} + \text{residual}$

Where y was a vector contained the score on the ideal future farm gradient (the second dimension of MCA); effect was the qualitative variables of the survey. In other words, the model was :

Ideal future farm gradient = categorical variable + e

To study the relationships between the gradient and the quantitative variables of the survey, correlation coefficients and their level of significance were calculated.

Line 160- What are the quantitative variables?

A-C Dalcq: Quantitative is a statistical term defining a continuous numerical variable. Do you want that we use the term « numerical » ? But this term is less precise as it does not reflect the continuous dimension of the variable.

Table 1- What are the ns? Maybe a total figure? Percentages?

A-C Dalcq: Absolute frequencies named counts. We precised at lines 186 and 194: “Absolute frequencies (counts)”.

How many questions in each dimension?

A-C Dalcq: One question. We have now mentioned that in the Materials and methods section at Lines 187-188: “and of the answer to the question which corresponds to this corresponding characteristic for the current situation”.

Line 180- specifics of response rate still missing.

A-C Dalcq: The response rate is 6,1% (Line 200). Which supplementary indication do you need? We gave you numbers of farms with a dairy activity in Belgium and in European Union in this letter. We give also more information about the conditions where the survey was communicated to the producers to give you an idea of the way of proceeding. More information is given at lines 120-126.

Lines 120-126: “We communicated with Walloon dairy producers about the goals of the survey and its access broadly via all communication ways towards them : specialised press, agricultural internet websites, Unions and also advertisements through the milk payment letter which is sent to all the Walloon dairy producers once a month. The survey written in French can be viewed at the following internet link:

<https://www.gembloux.ulg.ac.be/enquete/index.php/219425?lang=fr> and its English translation is viewable in the Appendix“

Table 2- list questions?

We have added the question in the table (Line 223).

Question

Without taking into account your current farm, what is, according to you, the ideal future farm to ensure a revenue?“ PropositionPercentage (%)

Intensive vs. extensiveIntensive43

Extensive30

No opinion27

Specialised vs. diversifiedSpecialised43

Diversified47

No opinion10

Strongly vs. weakly based on new technologiesStrongly35

Weakly41

No opinion24

Managed by an independent farmer vs. a group of managersIndependent farmer72

Group of managers18

No opinion10

Family vs. employed workforceFamily87

Employed5

No opinion8

Providing dairy production for local vs. global marketGlobal43

Local32

No opinion25

Providing standard vs. differentiated quality dairy productionStandard38

Differentiated quality45

No opinion17

Totals

A-C Dalcq: It is now mentioned at line 223.

Figure 1 define dimensions. What are the percentages in the axes labels?

A-C Dalcq: The percentages in the axes labels are the inertia but these ones underestimated the part of information explained by the dimensions. The corrected inertia values were calculated. This is explained in the Materials and methods section at lines 142-146: “For a MCA, the eigenvalue of the dimensions generated, named principal inertia, is a biased measure of the amount of information presented by a dimension (Palm, 2007). Corrected inertia rates were calculated, as described by Benzécri (Benzécri, 1979), to quantify the correct proportion of information of a dimension.”

The corrected values of inertia are presented at lines 248-250. The nature of the values are precised in the caption of the figure (lines 251-253).

“The percentage of principal inertia of the dimensions 1 and 2 of MCA were 16.75% and 12.38%, respectively (Fig 1). The value of corrected inertia for the two first dimensions reached 72.7% and 21.5% respectively, gathering almost 95% of the information.

Fig 1. Representation of the modalities in the multiple correspondence analysis first factorial plan. Values of principal inertia reached 16.75% and 12.38%. Values of corrected inertia reached 72.7% and 21.5%.”

The correction of Benzécri is made following this calculation:

corrected inertia=  $\left[\frac{s}{(s-1)}\right]^2 \cdot (\mu_k - 1/s)^2$  with  $\mu_k > 1/s$

s = number of categorical variables in the MCA

$\mu_k$  = eigenvalue of the dimension

(0.33508 and 0.2475, eigenvalues of respectively the first and second dimension of the present MCA)

The corrected inertia gives a better appreciation of the amount of information explained by each dimension (Benzécri, 1979), than the inertia automatically provided by the software.

We did not think necessary to precise this in the paper but we provide the reference where this calculation is presented.

Line 335- where is this figure reference from

A-C Dalcq : We did not provide a representation of the distribution of the producers along the second dimension, we did not think it was necessary as we provided the percentages and this figure would lengthen the paper. But following your request, we have now added this figure in the present manuscript (Lines 376-377).

Fig 2. Distribution of the producers along the second dimension (the dotted line represents the mean score on the second dimension of the producers)(N = 207)

Table 5-footnotes? Which is LBI and which GBI

A-C Dalcq : We were not sure about the goal of your question. We precised the function of the letters a and b. Concerning your request about the LBE and GBI, as explained with more details in the point 1/, the analysis is not done between groups LBE or GBI and the variables present in the survey but between an ideal future farm gradient and the variables present in the survey. The means presented in the tables 5, 7 and 8 are the mean value of this gradient for the different modalities of the categorical variables. We explained this at lines 390-395.

Lines 390-395: "Tables 5, 7 and 8 give the results of generalised linear models where the categorical variables were introduced separately as a fixed effect in the model. Significantly lower estimates of IFFg for a specific modality of the considered categorical variable depicts a tendency of producers desiring a LBE model to choose this modality, while significantly higher estimates of IFFg means a tendency of producers wanting a GBI model to choose this modality."

What test is used here?

A-C Dalcq: Generalised linear models were used to study the level of significance of the differences between the means values of the gradient of the modalities of categorical variables: y was the ideal future farm gradient and the effect included in the model was the categorical variable. We explained this part of the method in the Materials and methods section at lines 178-184.

Lines 178-184: "For categorical variables, the scores of MCA dimensions were modelled using these variables as a fixed effect in a generalised linear model. Least squares means were estimated for the two-by-two comparisons using the Tukey test. The level of significance of those differences was assessed based on the P-value of the test. For quantitative variables, Pearson correlation coefficients were calculated between the scores of MCA dimensions and these variables. Their corresponding P-values were estimated to observe if the correlation values were significantly different from 0."

Line 356 explain what they mean by introduced as fixed effect

A-C Dalcq: As explained in the point 1/ of this letter, the gradient was used as y (variable to be explained) of the generalized linear models and the fixed effect introduced in the generalized linear model was the categorical variables. See the previous answer related to the same topic for more details.

Line 620- What is SFI

A-C Dalcq : We precised this at line 661. "SFI = study, formation and information ». It is after the table. We have now added an asterisk to highlight the explanation of this abbreviation.

Reviewer #3: Thanks to the authors, ho made significant improvements to the paper. The full potential of the data is now revealed in the analysis. I particularly appreciate the improvements on the description of the « no-opinion » farmers, as suggested in my first review.

A-C Dalcq: Thank you for the interest given to this study.

Specific comments:

84: add references to « This change implied the disappearance of regulation of dairy supplies and caused volatility and decrease in the milk price »

A-C Dalcq: We added a reference and precised our purpose (Lines 83-84). Thanks for your remark.

Lines 83-84: "This change implied the disappearance of regulation of dairy supplies and was bringing uncertainty about the milk price (16). caused volatility and decrease in the milk price. "

Reference 16: Salou, T., H.M.G. van der Werf, F. Levert, A. Forslund, J. Hercule, and C. Le Mouël. 2017. Could EU dairy quota removal favour some dairy production systems over others? The case of French dairy production systems. *Agric. Syst.* 153:1–10. doi:10.1016/j.agsy.2017.01.004.

99-100: the question #2 is unclear. « What is the proportion of producers desiring the different IFF? » should be rephrased a bit maybe. The expression « the different IFF » will be vague for the readers. Is the IFF always different from the current farm ? And I guess « their IFF » is more thuitable than « the IFF » as each respondent will provide a personal definition of their IFF.

A-C Dalcq: We understand your will to make this question clearer. We have replaced it by « How the dairy producers distribute themselves between IFF highlighted ? » (Lines 100-101, lines 365-366).

122: you do not answer to another reviewer's comment, who wanted to know the response rate to the interview. To how many farmers was this survey submitted ? e.g. number of farmers buying the « specialised press », number of advertisements sent with the milk payment letter etc.

A-C Dalcq: We precised in the text that all the Walloon dairy producers received this payment letter: +/- 4,000 producers. Therefore, the 245 respondents correspond to 6,1% of the population, i.e. the response rate. We added information at lines 120-126 & 200-201. We do not know if the information number of farmers buying the « specialised press », number of advertisements sent with the milk payment letter are necessary in this paper but we added information to give an idea of the conditions in which the survey was communicated.

Lines 120-126: "We communicated with Walloon dairy producers about the goals of the survey and its access broadly via all communication ways towards them : specialised press, agricultural internet websites, Unions and also advertisements through the milk payment letter which is sent to all the Walloon dairy producers once a month. The survey written in French can be viewed at the following internet link:

<https://www.gembloux.ulg.ac.be/enquete/index.php/219425?lang=fr> and its English translation is viewable in the Appendix.

A total of 245 producers completed our survey between November 2014 and January 2015."

Lines 200-201: "The sample set of 245 producers represented 6.1% of the dairy producers in Wallonia (about 4,000 dairy producers in 2015 and 3,500 in 2017 (STATBEL, 2019)."

240:253 : the description of the no-opinion farmers adds value to the data analysis. However I am not sure that the last sentence is useful. This is your personal interpretation, but the data do not permit to reveal it.

A-C Dalcq: Indeed, this sentence was deleted (Line 279). Thanks for your remark.

Tables 3 and 4: you have two columns, which are « complete sample » and « no-opinion farmers ». A third column which reflects the sample excluding the no-opinion farmers will permit the reader to compare the no-opinion ones with the others.

A-C Dalcq: Indeed, this column was added (Lines 280, 283). And, as asked by reviewer#2, we realized (1) generalized linear models to compare the means of the quantitative variables between the no-opinion producers and producers with an opinion and (2) tests of proportion to compare the proportion of each modalities of the categorical variables between the no-opinion producers and producers with an opinion. We added description of these statistical treatments in the Materials and Methods section (Lines 157-160).

333 : as already said, I think this title is not well written and could be more explicit.

A-C Dalcq: It was changed at lines 365-366. See also the answer to your previous comment related to the same topic.

350 : pigeonholes. Could you be more precise?

A-C Dalcq: As it caused doubt in your comprehension of this idea, we replaced by boxes (Line 384).

Put people (here dairy producers) in boxes.

It was used to explain the fact to put a label of someone. But in this paper, we want to nuance the position of the producer regarding its ideal future farm.

| Additional Information:                                                                                                                                                                                                                                                                                                                                                                                                                                                                                                                                                                                                                                                                                                                                                                                                                                                                                                                                                                                                                                                                                                                                                                                                                                                                                                                                                             |                                                                     |
|-------------------------------------------------------------------------------------------------------------------------------------------------------------------------------------------------------------------------------------------------------------------------------------------------------------------------------------------------------------------------------------------------------------------------------------------------------------------------------------------------------------------------------------------------------------------------------------------------------------------------------------------------------------------------------------------------------------------------------------------------------------------------------------------------------------------------------------------------------------------------------------------------------------------------------------------------------------------------------------------------------------------------------------------------------------------------------------------------------------------------------------------------------------------------------------------------------------------------------------------------------------------------------------------------------------------------------------------------------------------------------------|---------------------------------------------------------------------|
| Question                                                                                                                                                                                                                                                                                                                                                                                                                                                                                                                                                                                                                                                                                                                                                                                                                                                                                                                                                                                                                                                                                                                                                                                                                                                                                                                                                                            | Response                                                            |
| <p><b>Financial Disclosure</b></p> <p>Enter a financial disclosure statement that describes the sources of funding for the work included in this submission. Review the <a href="#">submission guidelines</a> for detailed requirements. View published research articles from <a href="#">PLOS ONE</a> for specific examples.</p> <p>This statement is required for submission and <b>will appear in the published article</b> if the submission is accepted. Please make sure it is accurate.</p> <p><b>Unfunded studies</b><br/>Enter: <i>The author(s) received no specific funding for this work.</i></p> <p><b>Funded studies</b><br/>Enter a statement with the following details:</p> <ul style="list-style-type: none"> <li>• Initials of the authors who received each award</li> <li>• Grant numbers awarded to each author</li> <li>• The full name of each funder</li> <li>• URL of each funder website</li> <li>• Did the sponsors or funders play any role in the study design, data collection and analysis, decision to publish, or preparation of the manuscript?</li> <li>• <b>NO</b> - Include this sentence at the end of your statement: <i>The funders had no role in study design, data collection and analysis, decision to publish, or preparation of the manuscript.</i></li> <li>• <b>YES</b> - Specify the role(s) played.</li> </ul> <p>* typeset</p> | <p>The author(s) received no specific funding for this work.</p>    |
| <p><b>Competing Interests</b></p> <p>Use the instructions below to enter a competing interest statement for this submission. On behalf of all authors, disclose any <a href="#">competing interests</a> that could be perceived to bias this work—acknowledging all financial support and any other relevant financial or non-financial competing interests.</p>                                                                                                                                                                                                                                                                                                                                                                                                                                                                                                                                                                                                                                                                                                                                                                                                                                                                                                                                                                                                                    | <p>The authors have declared that no competing interests exist.</p> |

This statement **will appear in the published article** if the submission is accepted. Please make sure it is accurate. View published research articles from [PLOS ONE](#) for specific examples.

**NO authors have competing interests**

Enter: *The authors have declared that no competing interests exist.*

**Authors with competing interests**

Enter competing interest details beginning with this statement:

*I have read the journal's policy and the authors of this manuscript have the following competing interests: [insert competing interests here]*

\* typeset

**Ethics Statement**

Enter an ethics statement for this submission. This statement is required if the study involved:

- Human participants
- Human specimens or tissue
- Vertebrate animals or cephalopods
- Vertebrate embryos or tissues
- Field research

Write "N/A" if the submission does not require an ethics statement.

General guidance is provided below. Consult the [submission guidelines](#) for detailed instructions. **Make sure that all information entered here is included in the Methods section of the manuscript.**

The Board of Ethics and Scientific Integrity of the University of Liege waives the need for ethical approval. We communicated with Walloon dairy producers about the goals of the survey and its access via specialised press, and advertisements through the milk payment letter which is sent to all the Walloon dairy producers once a month. The survey can be viewed at the following internet link:  
<https://www.gembloux.ulg.ac.be/enquete/index.php/219425?lang=fr>

I agree with this ethics statement.

**Format for specific study types**

**Human Subject Research (involving human participants and/or tissue)**

- Give the name of the institutional review board or ethics committee that approved the study
- Include the approval number and/or a statement indicating approval of this research
- Indicate the form of consent obtained (written/oral) or the reason that consent was not obtained (e.g. the data were analyzed anonymously)

**Animal Research (involving vertebrate animals, embryos or tissues)**

- Provide the name of the Institutional Animal Care and Use Committee (IACUC) or other relevant ethics board that reviewed the study protocol, and indicate whether they approved this research or granted a formal waiver of ethical approval
- Include an approval number if one was obtained
- If the study involved *non-human primates*, add *additional details* about animal welfare and steps taken to ameliorate suffering
- If anesthesia, euthanasia, or any kind of animal sacrifice is part of the study, include briefly which substances and/or methods were applied

**Field Research**

Include the following details if this study involves the collection of plant, animal, or other materials from a natural setting:

- Field permit number
- Name of the institution or relevant body that granted permission

**Data Availability**

Authors are required to make all data underlying the findings described fully available, without restriction, and from the time of publication. PLOS allows rare exceptions to address legal and ethical concerns. See the [PLOS Data Policy](#) and [FAQ](#) for detailed information.

No - some restrictions will apply

A Data Availability Statement describing where the data can be found is required at submission. Your answers to this question constitute the Data Availability Statement and **will be published in the article**, if accepted.

**Important:** Stating 'data available on request from the author' is not sufficient. If your data are only available upon request, select 'No' for the first question and explain your exceptional situation in the text box.

Do the authors confirm that all data underlying the findings described in their manuscript are fully available without restriction?

**Describe where the data may be found in full sentences. If you are copying our sample text, replace any instances of XXX with the appropriate details.**

- If the data are **held or will be held in a public repository**, include URLs, accession numbers or DOIs. If this information will only be available after acceptance, indicate this by ticking the box below. For example: *All XXX files are available from the XXX database (accession number(s) XXX, XXX).*
- If the data are all contained **within the manuscript and/or Supporting Information files**, enter the following: *All relevant data are within the manuscript and its Supporting Information files.*
- If neither of these applies but you are able to provide **details of access elsewhere**, with or without limitations, please do so. For example:

*Data cannot be shared publicly because of [XXX]. Data are available from the XXX Institutional Data Access / Ethics Committee (contact via XXX) for researchers who meet the criteria for access to confidential data.*

*The data underlying the results presented in the study are available from (include the name of the third party*

Data were collected by the Committee of 'Carrefour des Productions Animales', a committee of stakeholders of animal sector in the Walloon Region of Belgium (research center, agricultural unions, university). The data are stored on the CAMI platform of Gembloux Agro-Bio Tech. A request can be made to the President of the platform Mr Gengler (Nicolas.Gengler@uliege.be) to get data.

|                                                                                                                                                                                                                                         |  |
|-----------------------------------------------------------------------------------------------------------------------------------------------------------------------------------------------------------------------------------------|--|
| <p><i>and contact information or URL).</i></p> <ul style="list-style-type: none"><li>• This text is appropriate if the data are owned by a third party and authors do not have permission to share the data.</li></ul> <p>* typeset</p> |  |
| Additional data availability information:                                                                                                                                                                                               |  |

# 1    **How do dairy farmers wish their future farm?**

2    Anne-Catherine Dalcq<sup>1\*</sup>, Thomas Dogot<sup>1</sup>, Yves Beckers<sup>1</sup>, Yves Brostaux<sup>1</sup>, Eric  
3    Froidmont<sup>2</sup>, Frédéric Vanwindekens<sup>2</sup>, Hélène Soyeurt<sup>1</sup>

4    <sup>1</sup> University of Liège, Gembloux Agro-Bio Tech, TERRA Teaching and Research  
5    Centre, Passage des Déportés 2, 5030 Gembloux, Belgium

6    <sup>2</sup> Walloon Research Centre, Rue du Liroux, 8, 5030 Gembloux, Belgium

7

8    \*Corresponding author

9    E-mail : [anne-catherine.dalcq@uliege.be](mailto:anne-catherine.dalcq@uliege.be) (ACD)

10    Ideal future dairy farms to ensure revenue

## 11    **Abstract**

12    Dairy farming systems are evolving. This study presents dairy producers' perceptions  
13    of their ideal future farm (**IFF**) to ensure revenue, and attempts to determine the  
14    reasons for this choice, the environmental aspects related to this choice, the proximity  
15    between the current farm and the IFF and the requirements for reaching this IFF. Just  
16    before the end of the European milk quota, a total of 245 Walloon dairy producers  
17    answered a survey about the characteristics of their IFF and other socio-  
18    environmental-economic information. A multiple correspondence analysis (**MCA**) was  
19    carried out using seven characteristics of the IFF (intensive vs. extensive, specialised  
20    vs. diversified, strongly vs. weakly based on new technologies, managed by a group  
21    of managers vs. an independent farmer, employed vs. familial workforce, local vs.  
22    global market, standard vs. quality-differentiated production) to observe the

23 relationships between them. Based on the main contributors to the second dimension  
24 of the MCA, this axis was defined as an IFF gradient between the local-based  
25 extensive (**LBE**) producers (26%) and the global-based intensive (**GBI**) producers  
26 (46%). The differences of IFF gradient between modalities of categorical variables  
27 were estimated using generalised linear models. Pearson correlations were calculated  
28 between the scores on the IFF gradient and quantitative variables. Finally, frequencies  
29 of IFF characteristics and the corresponding characteristic for the current situation  
30 were calculated to determine the percentages of “unhappy” producers. Some reasons  
31 for the choice of IFF by the producers have been highlighted in this study.  
32 Environmental initiatives were more valued by LBE than GBI producers. Low similarity  
33 was observed between the current farm situation of the respondents and their IFF  
34 choice. LBE and GBI producers differed significantly regarding domains of formation  
35 (technical and bureaucratic vs. transformation and diversification respectively) and  
36 paths of formation (non-market vs. market respectively). Two kinds of farming systems  
37 were considered by dairy producers and some socioeconomic and environmental  
38 components differed between them.

39

## 40 Introduction

41 Food is a basic need. Working to provide food for themselves and their family  
42 was the task of everyone at the dawn of humanity. The progressive organisation of  
43 society during the Neolithic period has led to the appearance of “producers” who are  
44 responsible for producing food for more than just themselves and their family (1,2).  
45 Since World War II, public policies have been set up to increase food production (3).  
46 These policies impacted the development of producers and their farms in the European  
47 Union. In the southern part of Belgium, the mean number of cows and the mean  
48 agricultural area per producer increased between 1980 and 2017 from 20 to 66 heads  
49 and from 25 to 71 hectares, respectively (4).

50 Producers are now facing great challenges to stay profitable. The price of the  
51 inputs (e.g. buildings, agricultural machinery, installations, feeding, veterinary care) of  
52 dairy production (**DP**) are increasing while the milk price shows great variability and its  
53 inflation is not similar to that observed for the inputs (5,6). Moreover, the European  
54 Union has decreased financial support to farmers (7). On 1<sup>st</sup> April 2015, the European  
55 Union removed the quota system which had managed the supply of DP (8). This led to  
56 greater milk price volatility. Additionally, sanitary crises such as mad cow disease  
57 (bovine spongiform encephalopathy (BSE)) and the dioxine crisis, among others, have  
58 shocked consumers and led to new rules and regulations at European level and to the  
59 creation of food security agencies in its countries. Moreover, these episodes modified  
60 consumers’ behaviours regarding their food purchases, they asked for more  
61 transparency and directed themselves towards organic food or local chains (9).  
62 Besides the economic view, the impacts of farming on the environment have been  
63 noted and policies have been set up in the Common Agricultural Policy to solve these  
64 problems (6,10).

65           In this context, the question often asked by dairy producers and stakeholders of  
66 the dairy sector is what the future of dairy farming entails, how to remain profitable and  
67 more generally sustainable. Several authors, such as Napoléone *et al.* (11), Havet *et*  
68 *al.* (5) and Lebacqz (6), have studied the evolution of dairy farming and the present dairy  
69 systems, finding trends that exist in the sector. For instance, the project Mouve, funded  
70 by the French National Research Agency, studied the evolution of dairy farming  
71 systems in 6 dairy basins around the world. Their results gathered the publications of  
72 Napoléone *et al.* (11) and Havet *et al.* (5). Moreover, some other authors (e.g.,  
73 Bergevoet *et al.* (12), Methorst *et al.* (13), Weltin *et al.* (14) and Verhees *et al.* (15)  
74 have studied the future paths of development considered by dairy producers. These  
75 studies were performed on the basis of data from 2001 to the beginning of 2013. They  
76 explored some reasons for these choices for the future.

77 This study is innovative as it asks what is the ideal future farm (**IFF**) perceived by the  
78 dairy farmers to ensure revenue. To our knowledge this question is not present in other  
79 studies. Moreover, respondent producers were asked not to take into account their  
80 current farm when considering their IFF. The data collection was conducted more  
81 recently, at the end of 2014 and the beginning of 2015. This was a particular context,  
82 just before the quota removal, when producers had this new perspective in mind. This  
83 change implied the disappearance of regulation of dairy supplies and was bringing  
84 uncertainty about the milk price (16). We have assumed that this change in their  
85 working framework impacted respondents reflections and led them to reconsider their  
86 strategies, taking into account this new reality. They had just faced two important milk  
87 crises associated with low milk price in 2009 and an increase of the cost of inputs in  
88 2012. This research studied unprecedented reasons for the choice of IFF compared to  
89 what is present in the literature, to our knowledge, such as past events of the farms.

90 Moreover, the present study explored the environmental and training aspects linked to  
91 this IFF vision. The environmental aspect is of high importance at a time of increasing  
92 awareness of the impacts of agriculture and breeding on the environment such as  
93 carbon footprints, biodiversity, etc. The topic of trainings for dairy producers was  
94 studied to orientate universities and other stakeholders of **breeding improvement**  
95 towards the domains needed and desired by dairy producers. A comparison between  
96 the current farm and the IFF of the respondent was realised, and permitted the  
97 difference between the reality and the aspiration of the producers to be studied. More  
98 specifically, the goals of this study were to answer the following questions: (1) What is  
99 the perception of dairy producers of their IFF? (2) How do dairy producers distribute  
100 themselves between IFF highlighted? By gathering different kinds of information, of  
101 which some are novel or rarely present in the literature, this study also answered to  
102 the following questions: (3) How do farmers decide on their IFF? (4) How do  
103 environmental aspects factor into IFF decisions? (5) Which paths and themes for  
104 training do farmers want in order to reach their desired IFF? And, ultimately, (6) how  
105 do farmers' IFF compare to their current dairy farming systems?

106

107

## 108 **Materials and methods**

### 109 **Survey and IFF typology**

110 In 2014, moving towards the end of the quota, as stakeholders of the dairy sector  
111 (research centre, agricultural sciences faculty, breeding association, agricultural  
112 unions, etc.), we wanted to know how the dairy producers of the southern part of  
113 Belgium will react to this change. We created a survey using LimeSurvey software  
114 (version 3.15.1+181017, LimeSurvey GmbH, Hamburg, Germany), which provides an  
115 internet link to get access and to complete the survey. The survey was first pre-tested  
116 orally with two dairy producers to estimate its duration and its clarity. The Board of  
117 Ethics and Scientific Integrity of the University of Liege waives the need for ethical  
118 approval. We communicated with Walloon dairy producers about the goals of the  
119 survey and its access broadly via all communication ways towards them : specialised  
120 press, agricultural internet websites, Unions and also advertisements through the milk  
121 payment letter which is sent to all the Walloon dairy producers once a month. The  
122 survey written in French can be viewed at the following internet link:  
123 <https://www.gembloux.ulg.ac.be/enquete/index.php/219425?lang=fr> and its English  
124 translation is viewable in the Appendix.

125 A total of 245 producers completed our survey between November 2014 and January  
126 2015.

127 The entire survey was composed of 127 questions where the answers were  
128 decomposed into 498 categorical and 44 quantitative variables.

129 The question ‘Without taking into account your current farm, what is, according to you,  
130 the ideal future farm to ensure a revenue?’ was proposed to the producers and they

131 must choose between short propositions on seven items: 1) intensive or extensive  
132 production; 2) specialised or. diversified activity (or activities); 3) farming strongly or  
133 weakly based on new technologies; 4) farm managed by an independent farmer or a  
134 group of managers; 5) family or employed workforce; 6) providing production for local  
135 or global markets; 7) providing standard or differentiated quality production. The  
136 modality “no opinion” was available for each IFF question. Counts were calculated for  
137 all modalities of these seven sub-questions.

138 The first step was to study if there were relationships between all modalities derived  
139 from the seven sub-questions asked. To achieve this objective, a multiple  
140 correspondence analysis (**MCA**) was carried out as the variables were categorical. For  
141 a MCA, the eigenvalue of the dimensions generated, named principal inertia, is a  
142 biased measure of the amount of information presented by a dimension (17). Corrected  
143 inertia rates were calculated, as described by Benzécri (18), to quantify the correct  
144 proportion of information of a dimension.

145 Classes were established to study the distribution of producers along the dimensions  
146 of the MCA. The interval between the 1% percentile and the 99% percentile of each  
147 dimension was divided equally into five classes. Then, the individuals per class were  
148 counted.

149 To exclude a group of producers with some characteristics if necessary, cluster  
150 analysis with the WARD method was used on the scores of the individuals on each  
151 dimension of the MCA. The WARD method is a hierarchical agglomerative method  
152 (19). The principle of this kind of method is to put initially the n individuals in n groups

153 and then to agglomerate the groups. The algorithm of WARD makes it in such a way  
154 that the gatherings induce the lowest decrease of  $R^2$  at each step.

155 If a group of producers was excluded, its characteristics were previously studied  
156 against the remaining producers. The level of significance of the difference of the  
157 quantitative characteristics between the excluded and the remaining producers was  
158 studied thanks to general linear models. The level of significance of the difference of  
159 the proportions for each modalities of the qualitative characteristics between the  
160 excluded and the remaining producers was studied thanks to tests of proportions.

## 161 **Characterisation of IFF choice**

162 To describe the dairy producers in terms of their IFF, the scores on MCA dimensions  
163 were studied as a function of other variables extracted from the survey. This method  
164 was chosen instead of the creation of classes, possible with the Latent Class Analysis  
165 method or the Numerical Classification on the scores of MCA (Hierarchical Clustering  
166 on Principal Components). This choice was motivated by the wish to not put the  
167 producers in boxes but to study their position on a gradient between potential extreme  
168 models identified along the dimension.

169 The other variables extracted from the survey whose the relationships with the  
170 dimension are studied were distributed within several themes. These were the effect  
171 of past crises, problems encountered by the farmer, production factors, age of the  
172 farmer, breed of the cow, diversification of activities and alternative valorisation,  
173 regrouping between producers, consideration of mechanisation and robotisation on the  
174 farm, the reaction of the farmer to external factors, the considerations of farmers about  
175 environmental aspects, climatic hazards, ways to reach the ideal formation and field of  
176 formation. For categorical variables, the scores of MCA dimensions were modelled

177 using these variables as a fixed effect in a generalised linear model. Least squares  
178 means were estimated for the two-by-two comparisons using the Tukey test. The level  
179 of significance of those differences was assessed based on the *P*-value of the test. For  
180 quantitative variables, Pearson correlation coefficients were calculated between the  
181 scores of MCA dimensions and these variables. Their corresponding *P*-values were  
182 estimated to observe if the correlation values were significantly different from 0.

183 To observe if dairy producers presented the farming characteristics they considered to  
184 be ideal at the moment of survey, absolute frequencies (counts) were calculated as a  
185 function of each ideal future farm characteristic and of the answer to the question which  
186 corresponds to this characteristic for the current situation (Table 1). Moreover, the  
187 percentage of “unhappy” producers was calculated as the ratio between the producers  
188 not currently in the situation that they consider as ideal and the total number of  
189 producers.

190 All editing and statistical analyses were carried out using SAS software (version  
191 9.4., SAS Inst. Inc., Cary, NC, USA).

192

193 **Table 1. Absolute frequencies (counts) of producers as a function of their answer to the ideal future farm characteristic and**  
 194 **the corresponding characteristic for the current situation and percentage of “unhappy” producers (i.e., percentage of**  
 195 **producers not currently in the situation that they consider to be ideal) (N = 245)**

196 <sup>1</sup> Frequency in grey box corresponds to producers not currently in the situation that they consider as ideal regarding this characteristic

|                                                                |                                    | Corresponding characteristic for the current situation |                                                                               | % of “unhappy” producers                                                     |     |
|----------------------------------------------------------------|------------------------------------|--------------------------------------------------------|-------------------------------------------------------------------------------|------------------------------------------------------------------------------|-----|
|                                                                |                                    | >2 cows per hectare of grass                           | <2 cows per hectare of grass                                                  |                                                                              |     |
| Ideal future farm characteristic                               | Intensive                          | 38                                                     | 66 <sup>1</sup>                                                               | 50%                                                                          |     |
|                                                                | Extensive                          | 22                                                     | 51                                                                            |                                                                              |     |
|                                                                |                                    |                                                        | Only dairy production activity                                                | Presence of activities other than dairy production                           | 37% |
|                                                                | Specialised                        | 46                                                     | 59                                                                            |                                                                              |     |
|                                                                | Diversified                        | 23                                                     | 93                                                                            |                                                                              |     |
|                                                                |                                    |                                                        | Presence of milking robot or agricultural equipment for a better technicality | Absence of milking robot or agricultural equipment for a better technicality | 37% |
|                                                                | Strongly based on new technologies | 33                                                     | 52                                                                            |                                                                              |     |
|                                                                | Weakly based on new technologies   | 16                                                     | 85                                                                            |                                                                              |     |
|                                                                |                                    |                                                        | >1 chief operating officer or associates                                      | 1 chief operating officer                                                    | 42% |
|                                                                | Managed by a group of managers     | 20                                                     | 25                                                                            |                                                                              |     |
|                                                                | Managed by an independent farmer   | 68                                                     | 108                                                                           |                                                                              |     |
|                                                                |                                    |                                                        | Presence of workers (i.e., external person to family working on the farm)     | No workers                                                                   | 10% |
|                                                                | With family workforce              | 17                                                     | 195                                                                           |                                                                              |     |
|                                                                | With employed workforce            | 7                                                      | 6                                                                             |                                                                              |     |
| Providing dairy production for local vs. global market         |                                    | No corresponding characteristic                        |                                                                               |                                                                              |     |
| Providing standard vs. differentiated quality dairy production |                                    | No corresponding characteristic                        |                                                                               |                                                                              |     |

197

## 198 **Results and discussion**

### 199 **Data representativeness**

200 The sample set of 245 producers represented 6.1% of the dairy producers in Wallonia   
201 (about 4,000 dairy producers in 2015 and 3,500 in 2017 (4)). The density of dairy farms  
202 throughout Wallonia was well represented in the sample, with a higher answer rate in  
203 the provinces more populated with dairy farms. More answers were obtained in the  
204 east part of Wallonia, where a higher density of dairy farms exists due to the grazing  
205 landscape that is particularly suitable for dairy production. Wallonia is a highly  
206 heterogeneous region with regard to soil and geological characteristics (20).

207 Dairy producers of the survey declared a mean of 79 cows and 86ha. Dairy production  
208 was their unique activity for 33% of them. The mean number of dairy cows per Walloon  
209 dairy farm was 52.9 cows in 2015 (21). No regional statistic exists on the mean  
210 agricultural area of all producers that perform a dairy activity. The mean agricultural  
211 area of specialised dairy farms and of all kind of farms taken together equated to 61.98  
212 ha and 55.8 ha, respectively (21). So, the producers surveyed tended to have bigger  
213 farms regarding herd size and agricultural area than the average Walloon farm that  
214 have dairy activity.

### 215 **What is the perception of dairy producers of their ideal** 216 **future farm?**

### 217 **Univariate approach**

218 As mentioned previously, the first aim of this study was to highlight the perceptions of  
 219 Walloon dairy producers of their ideal farm, just before the end of the milk quota. This  
 220 was done through the answers to 7 sub-questions. Table 2 shows the frequency for  
 221 each modality of those questions.

222 **Table 2 Percentages of responses to the seven questions about the ideal future**  
 223 **farm (N = 245)**

| Question                                                                                                                                                                                             | Proposition             | Percentage (%) |
|------------------------------------------------------------------------------------------------------------------------------------------------------------------------------------------------------|-------------------------|----------------|
| Without taking into account your current farm, what is, according to you, the ideal future  n to ensure a revenue?" | Intensive vs. extensive | 43             |
|                                                                                                                                                                                                      | Extensive               | 30             |
|                                                                                                                                                                                                      | No opinion              | 27             |
| Specialised vs. diversified                                                                                                                                                                          | Specialised             | 43             |
|                                                                                                                                                                                                      | Diversified             | 47             |
|                                                                                                                                                                                                      | No opinion              | 10             |
| Strongly vs. weakly based on new technologies                                                                                                                                                        | Strongly                | 35             |
|                                                                                                                                                                                                      | Weakly                  | 41             |
|                                                                                                                                                                                                      | No opinion              | 24             |
| Managed by an independent farmer vs. a group of managers                                                                                                                                             | Independent farmer      | 72             |
|                                                                                                                                                                                                      | Group of managers       | 18             |
|                                                                                                                                                                                                      | No opinion              | 10             |
| Family vs. employed workforce                                                                                                                                                                        | Family                  | 87             |
|                                                                                                                                                                                                      | Employed                | 5              |
|                                                                                                                                                                                                      | No opinion              | 8              |
| Providing dairy production for local vs. global market                                                                                                                                               | Global                  | 43             |
|                                                                                                                                                                                                      | Local                   | 32             |
|                                                                                                                                                                                                      | No opinion              | 25             |
| Providing standard vs. differentiated quality dairy production                                                                                                                                       | Standard                | 38             |
|                                                                                                                                                                                                      | Differentiated quality  | 45             |
|                                                                                                                                                                                                      | No opinion              | 17             |

224

225 Contrasting opinions of dairy farmers were observed for almost all questions except  
 226 for the type of management and the kind of workforce: 71.84% of the respondents  
 227 wanted an independent farmer management, and 86.53% focused on a family  
 228 workforce (Table 2). These results highlight a will in the southern part of Belgium to  
 229 maintain the traditional structure of work organisation in the future, with family  
 230 workforce and one director of operations. More globally in the world, dairy farms are  
 231 still mostly owned and managed by a family structure, whatever the degree of

232 development of the country (22,23). The choice of producers to work by themselves  
233 and not to deal with workers (i.e., an external person to the family employed on the  
234 farm) was noted in other studies. For example in Spain Gonzalez and Gomez (24)  
235 observed, when asking 3,370 farmers for their definition of a farmer, that more than  
236 half of them chose labourer and 12% chose businessman. In the USA in 1988, Mooney  
237 presented the fact that farmers had a particular status, being workers and employing  
238 other workers (25).

239 From Table 2, it is interesting to note that the highest percentages of abstention were  
240 observed for the questions about intensive vs. extensive, strongly vs. weakly based on  
241 new technologies, and providing DP for local vs. global markets. These results show  
242 that a quite significant proportion of the respondents did not take a position on these  
243 directions for the evolution of dairy farms.

## 244 **Multivariate approach**

245 To study the relationships between the answers given by the respondents to all  
246 questions about IFF, a MCA was performed as the related variables were categorical  
247 (Table 2). The percentage of principal inertia of the dimensions 1 and 2 of MCA were  
248 16.75% and 12.38%, respectively (Fig 1). The value of corrected inertia for the two first  
249 dimensions reached 72.7% and 21.5% respectively, gathering almost 95% of the  
250 information.

251 **Fig 1. Representation of the modalities in the multiple correspondence analysis**  
252 **first factorial plan.** Values of principal inertia reached 16.75% and 12.38%. Values of  
253 corrected inertia reached 72.7% and 21.5%.

254 The first dimension of MCA showed positive relationships with the modalities no  
255 opinion of each characteristic and negative relationships with all the modalities with an

256 opinion. Thus, the first dimension of the MCA allowed differentiation between the  
257 producers who did not give their opinion concerning characteristics of IFF and the  
258 producers who did (Fig 1). Cluster analysis was used to isolate the group of producers  
259 with a lot of 'no opinion' answers to the seven questions: this formed the first separation  
260 of classes of the analysis, dividing the "no-opinion" producers (15%) from the others  
261 (85%). The no opinion producers cluster (N = 38) was removed from the analysis to  
262 avoid potential bias coming from farmers who did not have a clear vision of their IFF.

263 Detailed information about this group is available in Tables 3 and 4. They tended to be  
264 older farmers (45-54 years), who came from Liège, which is a historic dairy region  
265 (Table 3). Even if it is not significant ( $P = 0.27$ ), they are less likely to have other animal  
266 production on the farm (Table 3). Percentages of grass and corn silage observed for  
267 this group highlighted a same way of feeding as the complete sample (Table 4). Even  
268 if these differences are not significantly different ( $P = 0.20$ ,  $P = 0.59$ ,  $P = 0.33$ ), the  
269 more represented single breed and the lower number of cows but with the higher milk  
270 delivery quota of the no-opinion producers tended to express quite technical and high  
271 performing producers in this group. They were more, even if not significant, to plan  
272 to keep constant their production (Table 3). Even if not significant ( $P = 0.32$ ), they  
273 declared more investment in the next five years than the complete sample, but no  
274 difference of investment was observed since 2009. They seemed to be people who  
275 have been dairy producers for a long time. We could assume that their farms had good  
276 economic performances and did not lead them to think about evolution in response to  
277 a great change (*i.e.* the quota removal).

278 **Table 3 Percentages of producers as a function of modalities of categorical**  
279 **variables for the no-opinion producers and the complete sample.**

| %                                                          | Complete sample<br>N = 245 | No-opinion producers<br>N = 38 | Producers with an opinion<br>N = 207 | <i>P</i><br>No-opinion vs. with opinion |
|------------------------------------------------------------|----------------------------|--------------------------------|--------------------------------------|-----------------------------------------|
| <b>Age (years)</b>                                         |                            |                                |                                      |                                         |
| 0-34                                                       | 18                         | 16                             | 19                                   | 0.64                                    |
| 35-44                                                      | 31                         | 32                             | 31                                   | 0.98                                    |
| 45-54                                                      | 37                         | 47                             | 35                                   | 0.15                                    |
| 55-64                                                      | 13                         | 6                              | 15                                   | 0.027                                   |
| <b>Geographical situation</b>                              |                            |                                |                                      |                                         |
| Walloon Brabant                                            | 6                          | 2                              | 6                                    | 0.24                                    |
| Hainaut                                                    | 32                         | 34                             | 31                                   | 0.74                                    |
| Liège                                                      | 34                         | 45                             | 32                                   | 0.14                                    |
| Luxembourg                                                 | 10                         | 5                              | 11                                   | 0.20                                    |
| Namur                                                      | 19                         | 13                             | 20                                   | 0.28                                    |
| <b>Importance of dairy activity</b>                        |                            |                                |                                      |                                         |
| Unique activity                                            | 33                         | 34                             | 32                                   | 0.83                                    |
| Preponderant activity                                      | 65                         | 61                             | 65                                   | 0.59                                    |
| Secondary activity                                         | 3                          | 5                              | 2                                    | 0.45                                    |
| <b>Herd breed</b>                                          |                            |                                |                                      |                                         |
| Single breed                                               | 33                         | 42                             | 31                                   | 0.20                                    |
| Multi-breed                                                | 67                         | 58                             | 69                                   | 0.20                                    |
| <b>Other animal production</b>                             |                            |                                |                                      |                                         |
| Yes                                                        | 45                         | 37                             | 46                                   | 0.27                                    |
| No                                                         | 55                         | 63                             | 54                                   | 0.27                                    |
| <b>Milk production evolution in the next 5 years</b>       |                            |                                |                                      |                                         |
| Decrease                                                   | 2                          | 0                              | 2                                    | 0.043                                   |
| Constant                                                   | 54                         | 63                             | 52                                   | 0.20                                    |
| Increase                                                   | 38                         | 32                             | 40                                   | 0.33                                    |
| Stop                                                       | 6                          | 5                              | 6                                    | 0.79                                    |
| <b>Agricultural area investment since 2009</b>             |                            |                                |                                      |                                         |
| Yes                                                        | 46                         | 47                             | 46                                   | 0.88                                    |
| No                                                         | 54                         | 53                             | 54                                   | 0.88                                    |
| <b>Agricultural area investment in the next five years</b> |                            |                                |                                      |                                         |
| Yes                                                        | 57                         | 64                             | 55                                   | 0.27                                    |
| No                                                         | 43                         | 36                             | 45                                   | 0.27                                    |

280

281 **Table 4: Means of quantitative variables for no-opinion producers and the**  
282 **complete sample**

|                           | Complete sample<br>N = 245 | No-opinion producers<br>N = 38 | Producers with an opinion<br>N = 207 | <i>P</i><br>No-opinion vs. with opinion |
|---------------------------|----------------------------|--------------------------------|--------------------------------------|-----------------------------------------|
| Agricultural area (ha)    | 86                         | 87                             | 85                                   | 0.80                                    |
| Percentage of corn silage | 15                         | 14                             | 15                                   | 0.67                                    |
| Percentage of grass       | 61                         | 60                             | 60                                   | 0.76                                    |
| Milk delivery quota (l)   | 558743                     | 632880                         | 545133                               | 0.33                                    |
| Number of cows            | 79                         | 73                             | 81                                   | 0.59                                    |

283

284 The second dimension of the MCA showed positive relationships with some modalities  
285 of the IFF characteristic and negative relationships with their opposite. Thus, this  
286 dimension seems to highlight the wishes of dairy farmers about their IFF, for those who  
287 took a position on this question. More precisely, this axis showed a gradation of  
288 question modalities and proximity between several characteristics. The second  
289 dimension of the MCA was the most interesting for highlighting the wishes of dairy  
290 farmers about their IFF, for those who took a position on this question. This axis  
291 showed a gradation of question modalities and proximity between several  
292 characteristics. This dimension led to the identification of two extreme tendencies  
293 (Fig 1); the modalities of familial workforce, independent farmer management and  
294 management by a group of farmers were near to zero on this axis (Fig 1). This means  
295 that the small proportion of producers supporting group management was distributed  
296 between the two extreme tendencies observed. The position of the modalities of  
297 familial workforce and independent farmer at the middle of the second dimension  
298 illustrated the fact that these modalities were chosen by producers from the two  
299 tendencies identified. The small proportion of producers choosing an employed  
300 workforce was positioned at the top of the second dimension (Fig 1).

301 The first tendency, related to high scores on the second MCA dimension, corresponds  
302 to IFF with the following characteristics: global market, standard milk, intensive system,  
303 employed workforce, specialised and strongly based on new technologies. Other  
304 authors have observed the same relations. From a trial of 458 French dairy farms,  
305 Hostiou *et al.* (26) highlighted a profile of farmers which simultaneously gathered high  
306 equipment, intensification and workers. From a trial of 3,370 producers of all sectors  
307 in Spain, Gonzalez and Gomez Benito (24) collated the characteristics of large  
308 holdings, market-orientated farming and management of workers. Cournut *et al.* (27)

309 highlighted different ways of evolving dairy farming in France, characterised by  
310 workers, mechanisation and high equipment. This tendency in dairy farming systems  
311 is explained by the evolution of the dairy system (6). The increased competition in the  
312 dairy market caused by the creation of the open European market, as well as the wish  
313 of consumers to have structures that gather all the food supplies in one place (*i.e.* a  
314 supermarket) led to the concentration of dairy processing in a few big firms (11). These  
315 firms were better placed to develop because they could control their collection costs,  
316 benefit from scale economies and were able to deliver to supermarkets with regularity  
317 in quantity and with a standard quality (9). This state and the world market have  
318 conditioned milk prices for the producers. Increasing production, thanks to more cows  
319 or higher productivity, is a possible way to stay profitable, considering the undergone  
320 milk price (5,11). To achieve profitability, an elevated production of milk per cow and  
321 an increase of cows on the farm are reached (11). Moreover, this increase in milk  
322 production at farm level was also forced by the orientated production Common  
323 Agricultural Policy (**CAP**) primes, although CAP has limited help for the dairy sector.  
324 Therefore, all of these characteristics intensify the dairy farming system. Intensification  
325 was defined by Garcia-Martinez *et al.* (28) as the maximisation of the rarest factor,  
326 traditionally the agricultural area. The increase in DP per unit of agricultural area was  
327 possible thanks to intensive production of forage and purchase of inputs that are  
328 produced where production costs were the lowest, to balance the ration and to increase  
329 the production per cow, or the number of cows reared on a hectare of agricultural area  
330 and therefore DP per unit of agricultural area at the level of the farm (9,11). This  
331 intensification led to more specialised farms with more dairy cows and their entire  
332 workforce directed to this specialisation (9). The enlargement of farms required a  
333 higher work rate; this was surmounted thanks to equipment and new technologies and

334 to increased human workforce: collective organisation, subcontracting to private firms  
335 and employment of workers (9).

336 The second tendency, contrary to the first tendency, was characterised by high  
337 negative scores on the second MCA dimension. This axis was represented by the  
338 following modalities: weakly based on new technologies, diversified, differentiated  
339 quality milk, local market and extensive system (Fig 1). This reflects another form of  
340 dairy farming. This form is favoured by a constant increase in input prices, combined  
341 with a growing demand from consumers for high quality and local-based products (9).  
342 These dairy producers choose to work with greater self-sufficiency to be less  
343 dependent on the undergone input prices (9). The “localisation” of the production  
344 demanded by consumers was executed thanks to this more locally-produced forage  
345 and fewer inputs from outside (5). This return to self-sufficiency led to more extensive  
346 farming (5). The production induced was also often quality-differentiated and dedicated  
347 to local markets (9). Cournut *et al.* (9) showed in their study that this kind of dairy  
348 farming is chosen by a minority of farms, which are still diversified.

349 This gradation with two kinds of models at the extremities of the second MCA  
350 dimension was also described in other studies (5,6,9,11,29–31). They were named  
351 globalisation vs. territorialisation by Cournut *et al.* (9), or globalisation vs. localisation  
352 by Napoleone *et al.* (11). Lebacqz (6) identified a “dualisation of dairy farming systems  
353 between ‘a mainstream model’ focusing on an increasing farm size, production  
354 intensity and specialisation and alternative models involving initiatives deviating from  
355 this trend and constituting niche developments (niches = minor elements, hardly  
356 sustainable against the mainstream model)”. Thanks to a survey answered by 180  
357 producers of all sectors in 2007 in France, concerning the evolution of their farms and  
358 their aspirations, Dockès *et al.* (30) also highlighted a major tendency towards the

359 enlargement, professionalisation and specialisation of farms, but those authors also  
360 mentioned that other farms wanted to develop diversified structures, orientated  
361 towards the requests of society, processing and farm accommodation.

## 362 **How do dairy producers distribute themselves between the** 363 **ideal future farms highlighted?**

364 The present study showed a bifurcation and quantified two ways: 46% vs. 26% of  
365 producers having high positive and high negative scores respectively on the second  
366 dimension (Fig 2). Verhees *et al.* (15) quantified producers as a function of their  
367 strategies of development, but solely regarding specialisation vs. diversification of their  
368 activity, 54.3% vs 15.1% respectively. The bifurcation phenomenon is also observed  
369 in the organic sector. Two models appeared: organic agriculture realised by historic  
370 actors and the other driven by the agribusiness to answer to a increasing organic  
371 demand (32–34).

372 **Fig 2. Distribution of the producers along the second dimension (the dotted line**  
373 **represents the mean score on the second dimension of the producers)(N = 207)**

## 374 **How do farmers decide on their ideal future farm?**

375 To study the relationships between the different IFF, the reasons for these and other  
376 interesting technico-economic information, the second dimension was considered as  
377 a gradient (**IFFg**) interpreted at the extremities as global-based intensive producers  
378 (GBI: high positive scores) and local-based extensive producers (LBE: high negative  
379 scores). The choice to work with a gradient rather than a clear separation of the two  
380 tendencies was motivated by the will to not put dairy producers into boxes.  
381 The mean of the scores of the second MCA dimension was  $-0.012$  with a SD of 0.053.  
382 Minimal and maximal values were  $-1.09$  and  $0.92$ , respectively.

383 Based on the interpretation of IFFg, a significant negative correlation indicates a higher  
 384 relationship with the dairy producers desiring a LBE model. By opposition, a significant  
 385 positive correlation means a higher link with the dairy producers desiring a GBI model.  
 386 Tables 5, 7 and 8 give the results of generalised linear models where the categorical  
 387 variables were introduced separately as a fixed effect in the model. Significantly lower  
 388 estimates of IFFg for a specific modality of the considered categorical variable depicts  
 389 a tendency of producers desiring a LBE model to choose this modality, while  
 390 significantly higher estimates of IFFg means a tendency of producers wanting a GBI  
 391 model to choose this modality. These analyses were conducted on the producers who  
 392 have an opinion (N = 207). The following paragraphs will summarise the potential  
 393 reasons driving the choice of IFF made by the Walloon dairy farmers.

394 ***Effect of past crisis on perceptions of the ideal future farm*** The producers that  
 395 were impacted by past crises wished more for a LBE model (estimate = -0.17, Table  
 396 5). This could be related to the suffering involved in the crisis and the wish to apply  
 397 solutions in order to not repeat this situation: revenue from diversified activities, other  
 398 outlets for the milk production sold (*i.e.* local market characteristic) and/or self-  
 399 sufficiency to be less dependent on purchased feed (*i.e.* extensive farm characteristic).  
 400 This is in agreement with a past finding (35). We observed a decrease in intensification  
 401 in 2012 which was the year of a dairy economic crisis mainly related to an increase in  
 402 the price of inputs.

403 **Table 5 Value and level of significance of the difference in the ideal future farm**  
 404 **gradient as a function of modalities of categorical variables: Reasons (N = 207)**

405 Means with different letters are significantly different.

| Categorical variable | Modality and estimate | P |
|----------------------|-----------------------|---|
|                      | Past crisis           |   |

|                                                                                               |                                            |                                                 |                                       |                      |                   |      |
|-----------------------------------------------------------------------------------------------|--------------------------------------------|-------------------------------------------------|---------------------------------------|----------------------|-------------------|------|
| Presence of deep modifications after crisis                                                   | No<br>0.031                                | Yes<br>-0.17                                    |                                       | 0.025                |                   |      |
| <b>Workload</b>                                                                               |                                            |                                                 |                                       |                      |                   |      |
| Degree of arduousness                                                                         | Not arduous<br>-0.11 <sup>b</sup>          | Arduous<br>-0.092 <sup>b</sup>                  | Highly arduous<br>0.15 <sup>a</sup>   | 0.0043               |                   |      |
| Member of an agricultural replacement service                                                 | Yes<br>0.058                               |                                                 | No<br>-0.0801                         | 0.059                |                   |      |
| Worker engagement: help for workload and administrative aspects                               | Already implemented<br>0.024 <sup>ab</sup> | To implement in the future<br>0.13 <sup>a</sup> | Not interested<br>-0.040 <sup>b</sup> | 0.25                 |                   |      |
| <b>Production factors</b>                                                                     |                                            |                                                 |                                       |                      |                   |      |
| Milk production evolution for 5 years                                                         | Decrease<br>-0.21                          | Constant<br>-0.13                               | Increase<br>0.052                     | 0.036                |                   |      |
| Agricultural area investment since 2009                                                       | No<br>-0.14                                |                                                 | Yes<br>0.14                           | 0.0002               |                   |      |
| Investment (no agricultural area) since 2009                                                  | No<br>-0.19                                |                                                 | Yes<br>0.015                          | 0.055                |                   |      |
| Agricultural area investment in 5 years                                                       | No<br>-0.0909                              |                                                 | Yes<br>0.046                          | 0.073                |                   |      |
| Geographical situation                                                                        | Brabant Walloon<br>0.11                    | Liège<br>0.12                                   | Namur<br>0.055                        | Luxembourg<br>-0.013 | Hainaut<br>-0.099 | 0.51 |
| <b>Age</b>                                                                                    |                                            |                                                 |                                       |                      |                   |      |
| Age (years)                                                                                   | 0-34<br>-0.086                             | 35-44<br>0.0105                                 | 45-54<br>0.0049                       | 55-64<br>0.0502      | 0.67              |      |
| <b>Diversification and alternative valorisation</b>                                           |                                            |                                                 |                                       |                      |                   |      |
| Presence of other animal production                                                           | Yes<br>-0.093                              |                                                 | No<br>0.0603                          | 0.037                |                   |      |
| Dairy processing and direct sales: sector developed if supported                              | Yes<br>-0.33                               |                                                 | No<br>0.11                            | <0.001               |                   |      |
| Processing and direct sales (except dairy): sector developed if supported                     | Yes<br>-0.39                               |                                                 | No<br>0.013                           | 0.0096               |                   |      |
| HORECA, tourism and teaching activity to develop even if sustained                            | Yes<br>-0.18                               |                                                 | No<br>0.018                           | 0.055                |                   |      |
| Concern for diversification                                                                   | Yes<br>-0.23                               |                                                 | No<br>0.17                            | <0.001               |                   |      |
| Alternative chain for milk production valorisation                                            | Yes<br>-0.49                               |                                                 | No<br>0.036                           | <0.001               |                   |      |
| Alternative chain for "other than dairy" activity                                             | Yes<br>-0.56                               |                                                 | No<br>-0.0087                         | 0.0017               |                   |      |
| Increase of "other than dairy" activity without investment                                    | Yes<br>-0.42                               |                                                 | No<br>-0.013                          | 0.012                |                   |      |
| No activity to develop even if sustained                                                      | Yes<br>0.27                                |                                                 | No<br>-0.10                           | <0.001               |                   |      |
| Increase of added value in farms: advantage of diversification and transformation             | Yes<br>-0.097                              |                                                 | No<br>0.11                            | 0.0047               |                   |      |
| Link between producers and consumers: advantage of diversification and transformation         | Yes<br>-0.14                               |                                                 | No<br>0.066                           | 0.0064               |                   |      |
| Conservation of farms in the region: advantage of diversification and transformation          | Yes<br>-0.16                               |                                                 | No<br>0.028                           | 0.037                |                   |      |
| Financial, decisional and technical autonomy: advantage of diversification and transformation | Yes<br>-0.27                               |                                                 | No<br>0.030                           | 0.005                |                   |      |
| Consumer loyalty: limit to diversification and transformation                                 | Yes<br>0.17                                |                                                 | No<br>-0.047                          | 0.028                |                   |      |

|                                                                                     |                                     |                                       |                                      |                                      |        |
|-------------------------------------------------------------------------------------|-------------------------------------|---------------------------------------|--------------------------------------|--------------------------------------|--------|
| Regulatory constraints (hygiene, etc.): limit to diversification and transformation | Yes<br>-0.080                       | No<br>0.055                           | 0.065                                |                                      |        |
| Size of investments: limit to transformation and diversification                    | Yes<br>-0.14                        | No<br>0.0401                          | 0.030                                |                                      |        |
| No constraints for transformation and diversification                               | Yes<br>-0.093                       | No<br>0.042                           | 0.052                                |                                      |        |
| No advantage of diversification and transformation                                  | Yes<br>0.27                         | No<br>-0.066                          | 0.0006                               |                                      |        |
| <b>Breed</b>                                                                        |                                     |                                       |                                      |                                      |        |
| Composition of the herd                                                             | Single breed<br>0.18                | Multi-breed<br>-0.095                 | 0.0005                               |                                      |        |
|                                                                                     | Pure-bred<br>0.0058                 | Dual purpose breed:<br>-0.19          | 0.0023                               |                                      |        |
| <b>Regrouping</b>                                                                   |                                     |                                       |                                      |                                      |        |
| Advantage of fiscal and administrative aspects: advantage of grouping               | Yes<br>-0.16                        | No<br>0.023                           | 0.050                                |                                      |        |
| Development of a joint project: advantage of grouping                               | Yes<br>-0.15                        | No<br>0.020                           | 0.072                                |                                      |        |
| Better marketing of the products: advantage of grouping                             | Yes<br>-0.38                        | No<br>0.0063                          | 0.030                                |                                      |        |
| <b>Mechanisation and robotisation</b>                                               |                                     |                                       |                                      |                                      |        |
| Mechanisation, robotisation: help with workload and administrative aspects          | Into effect<br>-0.031 <sup>ab</sup> | Not interested<br>-0.094 <sup>b</sup> | To activate<br>0.12 <sup>a</sup>     | 0.041                                |        |
| <b>Reaction to external factors</b>                                                 |                                     |                                       |                                      |                                      |        |
| Arduousness of the economic uncertainty of input price                              | No<br>-0.19                         | Yes<br>0.0403                         | 0.0089                               |                                      |        |
| Will of a dairy factory imposing production limits                                  | Yes<br>-0.23 <sup>c</sup>           | No<br>0.25 <sup>a</sup>               | Not important<br>0.0088 <sup>b</sup> | <0.001                               |        |
| Evolution of milk production during crises (2009, 2012)                             | Decrease<br>-0.17 <sup>b</sup>      | No variation<br>-0.092 <sup>b</sup>   | Increase<br>0.21 <sup>a</sup>        | 0.0006                               |        |
| Ideal size of the dairy factory                                                     | Small<br>-0.52 <sup>c</sup>         | Medium<br>-0.11 <sup>b</sup>          | Large<br>0.42 <sup>a</sup>           | Not important<br>-0.026 <sup>b</sup> | <0.001 |

406

407 **Workload** Workload seems to be less bearable for producers desiring a GBI model  
408 (estimate = 0.15, Table 5;  $R_{\text{workforce constraint}} = 0.22$ ,  $P = 0.002$ ). Producers wishing for a  
409 GBI model were also more likely to be members of an agricultural replacement service  
410 (estimate = 0.058, Table 5) and showed a tendency to be more interested in  
411 employment of workers (estimate = 0.13,  $P_{\text{worker engagement to implement vs. not interested}} = 0.11$ ,  
412 Table 5). The choice of GBI model could be explained by this current workload,  
413 involving the need for an increase of revenue. So, the solution considered could be  
414 higher milk production and the breeding of more cows rather than diversification of  
415 activities and self-valorisation activity, the development of which requires a lot of time.

416 Samson *et al.* (36) confirmed this in the Netherlands by highlighting a nearly significant  
417 effect of labour productivity on the DP increase strategy.

418 **Production factors** The size of agricultural area, the milk delivery quota, the number  
419 of cows and the percentage of corn silage currently observed in the farming system  
420 showed significant and positive correlations with IFFg ( $R = 0.15, 0.36, 0.18$  and  $0.24$ ;  
421  $P = 0.033, <0.001, 0.0099, 0.0002$  respectively). So, dairy producers choose their IFF  
422 partly as a function of their current production factors. This is expected as a higher  
423 number of hectares, cows and litres means a higher capacity of the dairy installation,  
424 of the material and so the possibility of a more preponderant dairy activity. The higher  
425 percentage of corn silage also reflected the possibility to seed corn silage, allowing the  
426 intensification of production as required within a GBI model. Similar relationships  
427 between characteristics of the farm and current or desired models of farming were  
428 observed by others. For Central and Eastern Europe, Verhees *et al.* (15) showed that  
429 land was the most important factor in developing a specific farming strategy. In France,  
430 Hostiou *et al.* (26) observed that intensified farms with higher technology equipment  
431 sometimes employed more workers, and were the farms with significantly higher  
432 agricultural area, percentage of corn silage, number of cows and milk quota. In the  
433 Netherlands, Samson *et al.* (36) showed that production intensity, number of cows,  
434 modernity of technology and availability of land were important factors in DP increase  
435 strategies.

436 In contrast, producers with lower production factors can consider rarely more  
437 enlargement and therefore think differently about the enhancement of their revenue:  
438 better valorisation of quality differentiated milk, other activities on the farm, self  
439 valorisation, the LBE model. Samson *et al.* (36) showed that lower stable capacity  
440 varies inversely to a DP increase strategy, which is rather a GBI tendency.

441 The findings of the current study, as confirmed by previous researchers, showed that  
442 producers work within a tightly constrained and regulated environment limiting their  
443 ability to determine the future of their farm according to their personal desires. This  
444 statement was also concluded by Mc Elwee *et al.* (37) and Methorst *et al.* (38). In the  
445 Netherlands, Keizer and Emvalomatis (39) and Groeneveld *et al.* (40) showed that  
446 bigger farms are more likely to increase than other farms.

447 However, based on the quite low values of the correlations obtained between the  
448 agricultural area and the number of cows, we can consider that this situation must be  
449 nuanced and that the IFF chosen also depends on the opinions of the dairy producer,  
450 not taking into account the current situation of his farm. This statement is reinforced by  
451 the fact that the correlation of percentage of meadow with IFFg was not significantly  
452 different to 0 ( $R = -0.097$ ,  $P > 0.1$ ). Also, the impact of the provinces of the Walloon  
453 Region, which present different geographical and soil characteristics, on IFFg were not  
454 significantly different ( $P = 0.51$ , Table 5).

455 Moreover the significant relations between IFFg and milk production evolution for five  
456 years (Table 5;  $R_{\text{quantity of milk variation}} = 0.30$ ,  $P < 0.001$ ), investment for and in five years  
457 (Table 5) support the assumption that the IFF chosen depends greatly on the mentality  
458 of the producers.

459 In their study, Methorst *et al.* (13) proved the heterogeneity of farm developments of  
460 producers facing the same socio-material context, showing the importance of the  
461 mentality of the producers in their decisions. Authors speak about shared values,  
462 norms, ways they see themselves or would like to be seen by producers, views,  
463 capacities and their perceptions of opportunities and any room for manoeuvre, skills,  
464 motives, entrepreneurship, goals and strategies (12,13,36,38,41) as factors which  
465 influence farm development. Samson *et al.* (36) discussed experimental economics,

466 which are economics where psychology and biology, which explain human behaviours,  
467 are added to better explain the development of enterprises. The consideration of more  
468 than just economic aspects permits them to reduce the error of their model for  
469 predicting DP increase strategies (36).

470 **Age** Age of the producer seems not to condition the desired IFF (Table 5). An IFF  
471 could be chosen because of either the new ideas of young producers or the experience  
472 of older producers. If mentality seems to influence IFF choice, it is not linked to age.  
473 The two kinds of IFF could be an answer to both innovation and problems encountered  
474 during a long career. Samson *et al.* (36) also studied age as a reflection of the farmers'  
475 values, goals and strategies, and showed no relationship with DP increase, which is  
476 rather a GBI characteristic. On the contrary, on the basis of data from 11 countries of  
477 the European Union, Weltin *et al.* (42) observed an effect of age on the tendency  
478 towards diversification, which is rather a LBE tendency.

479 **Diversification and alternative valorisation** The results obtained in this study  
480 showed a link between the diversification mentality and the choice of LBE model.  
481 Significant negative estimates or correlations were observed for the following variables  
482 related to diversification: the presence of other animal production (estimate =  $-0.093$ ,  
483 Table 5); the direct selling milk quota ( $R = -0.17$ ,  $P = 0.016$ ); dairy or no dairy  
484 processing and direct sales (estimates =  $-0.33$  and  $-0.39$ , Table 5); the development  
485 of HORECA activities, tourism and teaching (estimate =  $-0.18$ , Table 5); the concern  
486 for diversification (estimate =  $-0.23$ , Table 5); alternative chain for milk and other than  
487 milk production valorisation (estimates =  $-0.49$  and  $-0.56$ , Table 5) and the increase  
488 of "other than dairy" activity without investment (estimate =  $-0.42$ , Table 5).  
489 Conversely, producers desiring a GBI model were more likely to choose the item "no  
490 activity to develop if supported", suggesting the unique principal activity way of thinking

491 of producers aiming for a GBI model (estimate = 0.27, Table 5). Samson *et al.* (36)  
492 confirmed this tendency and showed that the presence of diversified activities evolved  
493 inversely to the increase of milk production. In this study, we observed potential  
494 explanations to support to this fact. Producers wishing for a LBE model considered  
495 self-valorisation and diversification as solutions to the current situation to enhance  
496 revenue due to the creation of added value (estimate =  $-0.097$ , Table 5). They thought  
497 that diversification and transformation allowed financial, decisional and technical  
498 autonomy (estimate =  $-0.27$ , Table 5) and were confident in consumer loyalty (estimate  
499 =  $-0.047$ , Table 5). They considered relations with consumers as an opportunity and  
500 not a threat, unlike producers desiring a GBI model (estimate = 0.17, Table 5). One  
501 reason GBI model producers gave against self-valorisation and diversification seemed  
502 to be the lack of trust in consumers and therefore the outlets. They frequently saw no  
503 advantage to self-valorisation and diversification (estimate = 0.27, Table 5). The  
504 relation to the consumer was also studied by Verhees *et al.* (15). They observed that  
505 consumer orientation was more often declared as an opportunity by the profiles of  
506 producers considering strategies similar to LBE. The positive impact of diversified  
507 activities on autonomy was also shown by Bergevoet *et al.* (12). They mentioned that  
508 proponents of the “extra source of income” model (closest to the LBE model) were  
509 more able to declare that they can increase the sales-price of their milk. Producers  
510 wishing for a LBE model were also likely to find no constraints to transformation and  
511 diversification (estimate =  $-0.093$ , Table 5). The only limits to diversification and  
512 transformation highlighted by producers wanting a LBE model were regulatory  
513 constraints (estimate =  $-0.080$ , Table 5) and the size of investments (estimate =  $-0.14$ ,  
514 Table 5). As a consequence of these considerations, producers wanting a LBE model  
515 felt that they were more able to meet society’s expectations regarding local and

516 artisanal products ( $R = -0.22$ ,  $P = 0.0016$ ) and the desire for a familial structure ( $R =$   
517  $-0.12$ ;  $P = 0.084$ ).

518 **Breed to produce milk** Producers wanting a LBE model are more open to breeding a  
519 dual-purpose herd (estimate =  $-0.19$ , Table 5), which permits them to diversify their  
520 production: milk and meat. Producers wishing for a GBI model target a single, more  
521 specialised breed (estimate =  $0.18$ , Table 5) which could offer more homogeneous  
522 management of the herd. The link between mentality, observed through the choice of  
523 breed(s), and the choice of IFF is once more highlighted.

524 **Regrouping** Producers tending towards the LBE model were more likely to promote  
525 regrouping for its advantages regarding fiscal and administrative aspects, the  
526 development of a joint project and the marketing of the products (estimates =  $-0.16$ ;  $-$   
527  $0.15$ ;  $-0.38$ , Table 5). The importance of mentality for the choice of IFF has been  
528 shown. A mentality of cooperation, as a solution to enhance their quality of life and  
529 revenue, tends to be shared between producers desiring a LBE model.

530 **Mechanisation and robotisation** We observed that the wish of technology of  
531 producers tending towards GBI model can be explained by the fact that they  
532 considered it as help for workload (estimate =  $0.12$ , Table 5). It can be assumed that  
533 the solution considered by them is to keep the same activity or increase it with help  
534 from machines. In southern France, Dufour *et al.* (43) observed the propensity of  
535 farmers with workers, close to the GBI model, to prioritise investment in equipment.  
536 Verhees *et al.* (15) observed that better management, including new technologies, was  
537 more cited as an objective for producers whose strategy profiles were more similar to  
538 the GBI than LBE models.

539 **Reaction to external factors** Reactions of dairy producers to factors external to their  
540 decision-making power tend to be different as a function of their choice of IFF, showing  
541 once more a different mentality of the producers. Producers wanting a LBE model tend  
542 to show themselves to be more independent from the external economic actors: from  
543 the input producing companies (estimate =  $-0.19$ , Table 5) and from the market and  
544 factories, rejecting contracts which would link them to it ( $R = -0.13$ , Table 6). When  
545 their opinion about dairy factories was surveyed, producers desiring a LBE model  
546 preferred small or medium units with production limits (estimates =  $-0.52$ ;  $-0.11$ ;  $-$   
547  $0.23$ , Table 5), as before, which means regulation of the dairy offerings on the market.  
548 Producers wishing for a GBI model direct themselves to big units of processing without  
549 production limits (estimates =  $0.42$ ;  $0.25$ , Table 5) and so more turned towards world  
550 markets. They recognise the freedom in regarding DP as an asset of quota removal ( $R$   
551 =  $0.23$ , Table 6). The reaction regarding the quantity of production was not similar  
552 during a crisis, producers wanting a LBE model tended to maintain or decrease their  
553 production (estimates =  $-0.17$ ;  $-0.092$ , Table 5), whereas producers desiring a GBI  
554 model tended to increase production (estimate =  $0.21$ , Table 5). The latter wanted to  
555 keep revenues constant with more litres produced when the price decreased, while the  
556 others controlled or decreased production when the gross margin per litre decreased.  
557 This can be due to a deliberate choice to decrease milk production or a decision to  
558 decrease the variable costs causing a decrease in milk production. These results can  
559 express a fear of producers tending toward the LBE model in considering world  
560 markets, contrary to producers tending towards the GBI model who have decided to  
561 work with this kind of market. Verhees *et al.* (15) observed that producers projecting  
562 strategies similar to the LBE model consider the market more as a threat than  
563 producers projecting strategies similar to the GBI model. Hansson *et al.* (44) and Weltin

564 *et al.* (14) explained that this uncertainty and risk perception can explain the choice of  
565 diversification, which is a part of the strategy of the LBE model.

566 Couzy and Dockès (7) demonstrated different profiles of farmers and observed the  
567 entrepreneurship mentality of each one, which highlights similar tendencies to those  
568 presented here. Several profiles showed strong entrepreneurship but which was  
569 expressed differently to here. A category of farmers showed entrepreneurship by their  
570 wish for autonomy of decision in their management; they will keep a working approach  
571 close to the conventional one but with a modernist vision, always adapting to the  
572 market. They want to keep freedom in the classical framework. In 1988, Mooney  
573 described the split personality of producers: they are independent people, making their  
574 own decisions regarding their way of working and their investments but at the same  
575 time are people dependent on different processing actors and banks (45). Another  
576 category of farmers showed entrepreneurship by their wish to develop an original idea,  
577 away from preexisting systems, a project in line with their conviction to be freer from  
578 the existing system [5].

579 Samson *et al.* (36) and Methorst *et al.* (13) reported that decisions of producers cannot  
580 be reduced to only economic aspects: this includes policies and market conditions but  
581 also their way of thinking about them.

582 **Table 6 Correlations (R) between the ideal future farm gradient and quantitative**  
583 **variables (N = 207)**

584 \*producers declaring no calling of replacement services were removed from this analysis

585

586

587

| Quantitative variable                                                                                     | R     | P      |
|-----------------------------------------------------------------------------------------------------------|-------|--------|
| <b>Reaction to external factors</b>                                                                       |       |        |
| Contract means dairy production more integrated to dairy factories: level of agreement                    | -0.13 | 0.076  |
| Quota removal means more flexibility concerning production: level of agreement                            | 0.23  | 0.0014 |
| <b>Considerations of the environmental aspects</b>                                                        |       |        |
| Degree of the constraint: livestock manure application                                                    | 0.16  | 0.022  |
| Facility to answer to society's expectations: environmentally friendly agricultural practices             | -0.15 | 0.027  |
| Agricultural activity is important for rurality of villages: level of agreement                           | -0.23 | 0.0011 |
| Agricultural activity is important for conservation of permanent grasslands: level of agreement           | -0.27 | <0.001 |
| Agricultural activity is important for biodiversity: level of agreement                                   | -0.18 | 0.0101 |
| Agricultural activity is important for planting and maintenance of hedges: level of agreement             | -0.28 | <0.001 |
| Importance of answering society's expectations for the revenue of the dairy producers: level of agreement | -0.11 | 0.11   |
| Ease of answering society's expectations: landscape and territory maintenance: level of agreement         | -0.19 | 0.0065 |
| <b>Needs: formation method</b>                                                                            |       |        |
| *Frequency of calling replacement services for meeting and formations (N = 104)                           | 0.21  | 0.066  |

588

## 589 **How do environmental aspects factor into IFF decisions?**

590 The environmental aspects related to the desired IFF were studied as awareness of  
591 the environmental impact of breeding has become an important issue of our time.

592 Producers tending toward the GBI model seemed to work with a higher livestock  
593 manure application pressure (R = 0.16, Table 6) and therefore are already more likely  
594 to work in an intensified dairy system, which can have a greater impact on the  
595 environment. Samson *et al.* (36) showed a tendency toward manure production surplus  
596 by producers with increasing DP, which is rather a GBI characteristic.

597 Results of practices that are in accordance with the environment: measurement of the  
598 grass height, forage mixture with leguminous plants, use of a field notebook (estimates  
599 = -0.27; -0.11; -0.074, Table 7) showed a stronger interest from producers wanting a  
600 LBE model.

601 **Table 7 Value and level of significance for the difference in the ideal future farm**  
602 **gradient as a function of modalities of categorical variables: Environmental**  
603 **aspects (N = 207)**

604 Means with different letters are significantly different.

| Categorical variable                                                               | Modality and estimate |        | P      |
|------------------------------------------------------------------------------------|-----------------------|--------|--------|
| <b>Considerations of environmental aspects</b>                                     |                       |        |        |
| Measurement of the grass height: optimisation practice                             | Yes                   | No     | 0.059  |
|                                                                                    | -0.27                 | 0.0083 |        |
| Forage mixture with leguminous plants: optimisation practice                       | Yes                   | No     | 0.0088 |
|                                                                                    | -0.11                 | 0.083  |        |
| Field notebook: optimisation practice                                              | Yes                   | No     | 0.065  |
|                                                                                    | -0.074                | 0.061  |        |
| <b>Climatic hazard</b>                                                             |                       |        |        |
| Increase of concentrate distribution: strategy to confront climatic hazards        | Yes                   | No     | 0.036  |
|                                                                                    | 0.22                  | -0.036 |        |
| Decrease of the herd: strategy to confront climatic hazards                        | Yes                   | No     | 0.037  |
|                                                                                    | -0.25                 | 0.014  |        |
| Food self-sufficiency: cause for maintaining constant or decreased milk production | Yes                   | No     | 0.14   |
|                                                                                    | -0.17                 | 0.0073 |        |

605 Besides these, all the significant negative correlations between IFFg and the levels of  
606 agreement with an agricultural area are important for the rurality of villages (R = -0.23,  
607 Table 6), for conservation of permanent grasslands (R = -0.27, Table 6), for  
608 biodiversity (R = -0.18, Table 6) and for hedges (R = -0.28, Table 6) showed the  
609 importance of the environment in the dairy activity of producers wanting a LBE model.  
610 It can be assumed that both LBE producers and GBI producers have concerns for the  
611 environment but in different ways. These results showed that LBE producers are more  
612 willing to employ the benefits of ecosystem services, which is observable in this  
613 database. Moreover, they found it easy to realise environmentally friendly agricultural  
614 practices, as asked for by society (R = -0.15, Table 6) and which are important to  
615 answer to society's expectations to guarantee their revenue (R = -0.11, Table 6).  
616 Bergevoet *et al.* (12) had a considerably more consistent opinion. The "extra-source of  
617 income" profile producers (showing similarities with the LBE model) were more likely  
618 to declare that in their decision-making they take the environment into consideration,

619 even if it lowers profit. The “large and modern farm” profile producers do not mention  
620 their will to adopt these initiatives.

621 **Climatic hazard** Facing feed shortages due to unfavourable climatic conditions,  
622 producers tending toward GBI and LBE seem not to have the same way of thinking;  
623 GBI producers intend to buy high nutritional feed to balance shortages (estimate =  
624 0.22, Table 7) and LBE producers are going to decrease the number of cows (estimate  
625 = -0.25, Table 7) and ensure their feed autonomy (estimate = -0.17, Table 7).

## 626 **How do farmers' ideal future farm compare to their current** 627 **farming systems?**

628 The current situation of dairy producers was compared to their preferred IFF (Table 1).  
629 Except for the type of workforce, quite high percentages of “unhappy” producers were  
630 observed for the farm characteristics, between 37 to 50%. This suggested that not all  
631 producers work as they would like to. The same comparison was not found in the  
632 literature, to our knowledge.

633 As dairy producers do not work in a way that they consider to be ideal, it is interesting  
634 to study the gaps to fill in order to reach their ideal system and so, amongst others,  
635 their needs. The study of the requirements to reach the IFF, including ways to meet  
636 these needs and the area of the needs, can inform the stakeholders of the dairy sector  
637 about what must be developed to evolve into IFF.

## 638 **Which paths and themes of training do dairy producers want** 639 **in order to reach their desired ideal future farm?**

640 **Paths to formation** As way to improve their skills, producers wanting GBI tended to  
641 favour consultancy (estimate = 0.17, Table 8) and commercial companies (estimate =

642 0.16, Table 8) and not days of study on other farms (estimate = 0.082, Table 8),  
 643 meanwhile producers wanting LBE supported this latter possibility (estimate = -0.088,  
 644 Table 8), a network of pilot farms (estimate = -0.13, Table 8) and the associate, non-  
 645 market sector (estimate = -0.21, Table 8). Moreover, for help in technical choices,  
 646 producers desiring LBE chose formation and study days (estimate = -0.15, Table 8)  
 647 and producers' technical groups to implement in the future (estimate = -0.20, Table 8).  
 648 The choices presented confirm the will for a non-market way to learn for producers  
 649 wanting LBE, contrary to producers wishing for GBI.

650 As an information source, the agricultural press was commonly cited (N = 161, *i.e.* 78%  
 651 of respondents), but producers desiring LBE tend to not want to inform themselves in  
 652 this conventional way (estimate = -0.14, Table 8).

653 Producers wanting a GBI model tend to need more help to free them from their work  
 654 in order to follow a formation (R = 0.21, Table 6)

655 **Table 8** Value and level of significance of the difference in the ideal future farm gradient  
 656 as a function of modalities of categorical variables: formations (N = 207)

657 Means with different letters are significantly different.

| Categorical variable                                 | Modality and estimate                     |                                                  |                                      | P      |
|------------------------------------------------------|-------------------------------------------|--------------------------------------------------|--------------------------------------|--------|
| <b>Needs: ways to learn formations</b>               |                                           |                                                  |                                      |        |
| **Consultancy company: SFI* place                    | Yes<br>0.17                               | No:<br>-0.087                                    |                                      | 0.0017 |
| **Study days on farm: SFI place                      | Yes<br>-0.088                             | No<br>0.082                                      |                                      | 0.026  |
| **Network of pilot farms: SFI place                  | Yes<br>-0.13                              | No<br>0.056                                      |                                      | 0.025  |
| **Associate, non-market sector SFI place development | Yes<br>-0.21                              | No<br>0.062                                      |                                      | 0.0023 |
| **Commercial company: SFI place                      | Yes<br>0.16                               | No<br>-0.058                                     |                                      | 0.014  |
| ***Agricultural press: information source            | Yes<br>0.025                              | No<br>-0.14                                      |                                      | 0.068  |
| Formation and study day: help for technical choices  | Already implemented<br>0.037 <sup>a</sup> | To implement in the future<br>-0.15 <sup>b</sup> | Not interested<br>0.035 <sup>a</sup> | 0.082  |

|                                                        |                                           |                                                  |                                      |        |
|--------------------------------------------------------|-------------------------------------------|--------------------------------------------------|--------------------------------------|--------|
| Producers technical groups: help for technical choices | Already implemented<br>0.020 <sup>a</sup> | To implement in the future<br>-0.20 <sup>b</sup> | Not interested<br>0.11 <sup>a</sup>  | 0.0046 |
| <b>Needs: domain formation</b>                         |                                           |                                                  |                                      |        |
| **Finance and management: requested formation          | Yes<br>0.066                              |                                                  | No<br>-0.24                          | 0.0007 |
| **Processing and diversification: requested formation  | Yes<br>-0.18                              |                                                  | No<br>0.089                          | 0.0008 |
| **Plant selection: requested formation                 | Yes<br>0.083                              |                                                  | No<br>-0.053                         | 0.087  |
| **Animal selection: requested formation                | Yes<br>0.080                              |                                                  | No<br>-0.082                         | 0.034  |
| **Animal feeding: requested formation                  | Yes<br>0.03                               |                                                  | No<br>-0.14                          | 0.073  |
| **Administrative: requested formation                  | Yes<br>0.064                              |                                                  | No<br>-0.11                          | 0.026  |
| **Legal framework: requested formation                 | Yes<br>0.14                               |                                                  | No<br>-0.083                         | 0.005  |
| Request for advice: help for financial aspects         | Already implemented<br>0.014 <sup>a</sup> | To implement in the future<br>-0.15 <sup>b</sup> | Not interested<br>0.049 <sup>a</sup> | 0.19   |

658 \*SFI = study, formation and information

659 \*\*producers declaring no will of formation were removed from this analysis

660 \*\*\* producers declaring no agricultural press as an information source were removed from this analysis

661

662 **Formation domains** The formation domains reflected the direction chosen by  
663 producers looking for LBE and the ways to reach it. They tend to want skills related to  
664 processing and diversification (estimate = -0.18, Table 8) and were likely to reject  
665 finance, management (estimate = -0.24, Table 8), administrative (estimate = -0.11,  
666 Table 8) and legal framework skills (estimate = -0.083, Table 8). For financial aspects  
667 producers wanting LBE tend to favour requests for advice from experts rather than  
668 self-formation (estimate = -0.15,  $P$  to implement vs. not interested = 0.12, Table 8). They do not  
669 choose animal feeding (estimate = -0.14, Table 8) and selection formations (estimates  
670 = -0.053; -0.082, Table 8). This could suggest the will of the producers not to change  
671 their way of management and the level of quality of their herd but the method of  
672 valorisation of their production.

673 In contrast, producers desiring GBI tend to want to continue to enhance their vegetal  
674 and animal production (estimates = 0.083; 0.08, Table 8), to become more efficient

675 and enhance their revenue. Moreover they are more interested in legal aspects  
676 (estimate = 0.14, Table 8). Expansion and complexification of the GBI model of dairy  
677 farms wished for by these producers could be an explanation. Bergevoet *et al.* (12)  
678 also observed a will to be well informed about the legislation for the “modern and large  
679 farm” profile. This is not noted in their profile, which is close to the LBE model.

680 Two kinds of formation were identified and preferred by producers wanting LBE or GBI  
681 models. Bergevoet *et al.* (12) observed the will to innovate for the two profiles closest  
682 to LBE and GBI profiles of this study. Verhees *et al.* (15) observed that formation was  
683 the most important resource for dairy producers. The present research differentiated  
684 the formation desired as a function of IFF. Dufour *et al.* (43) defined, through a survey  
685 of 15 dairy farmers, three conceptions of the work: difficult, organisational and  
686 passionate. The passionate approach was accompanied by the desire for new  
687 knowledge which was, as observed here, either to learn about genetic selection or  
688 about processing and marketing of products.

689

## 690 **Conclusions**

691 In conclusion, the GBI tendency is two times more represented than the LBE tendency.  
692 Many reasons explain this choice of ideal farm. Past crises seem to cause farmers to  
693 desire the LBE model. A high workload seems to orientate respondents to the GBI  
694 model. The wish for the IFF is influenced by the current framework but is also a  
695 question of mentality. Production factors reached, breeds chosen for the herd, ways to  
696 react to factors external to the farm, consideration of diversification and alternative  
697 valorisation, regrouping and mechanisation and robotisation describe the producers'  
698 mentality and showed different relations with the IFF chosen. Moreover LBE and GBI  
699 producers may both have concern for the environment, but the approach to act for the  
700 environment by LBE producers, through concern for ecosystem services, is clearly  
701 highlighted in this study. These producers found it important to answer to society's  
702 expectations. Finally, as the current situation of farming is quite different to the ideal  
703 one, the learning needs were studied and two types of customer appeared in relation  
704 to their formation. We conclude that two kinds of dairy producers seem to appear, for  
705 different reasons, with different relations to the environment and asking for different  
706 formations.

## 707 **Acknowledgments**

708 I want to thank the organising committee of "Carrefour des Productions animales" for  
709 the supply of the data.

710

## 711 References

- 712 1. Mazoyer M, Roudart L. Histoire des agricultures du monde. Du néolithique à la crise  
713 contemporaine. Editions du Seuil; 1997. 1–705 p.
- 714 2. Lefèvre D. Des racines et des gènes. Une histoire mondiale de l'agriculture. Volume 1. Rue de  
715 l'Echiquier; 2018. 1–567 p.
- 716 3. European Economic Community. Treaty of Rome. 1957.
- 717 4. STATBEL. Exploitations agricoles et horticoles - plus de chiffres [Internet]. 2019. Available from:  
718 <https://statbel.fgov.be/fr/themes/agriculture-peche/exploitations-agricoles-et-horticoles/plus>
- 719 5. Havet A, Cournut S, Correa P, Madelrieux S, Pocard R, Corniaux C, et al. Tandem changes in  
720 livestock farming and feed systems since 1960: a study of six dairy-producing regions. Fourrages  
721 [Internet]. 2015;222:115–24. Available from:  
722 [http://apps.webofknowledge.com/full\\_record.do?product=UA&search\\_mode=GeneralSearch&qid=3&SID=R2ZtQywoePOzfzM5uQW&page=16&doc=153&cacheurlFromRightClick=no](http://apps.webofknowledge.com/full_record.do?product=UA&search_mode=GeneralSearch&qid=3&SID=R2ZtQywoePOzfzM5uQW&page=16&doc=153&cacheurlFromRightClick=no)  
723
- 724 6. Lebacq T. La durabilité des exploitations laitières en Wallonie - Analyse de la diversité et voies  
725 de transition [Internet]. UCLouvain, Louvain-la-Neuve, Belgium; 2015. Available from:  
726 [http://www.philagri.net/wp-content/uploads/2015/03/TL\\_redaction\\_these\\_20150302.pdf](http://www.philagri.net/wp-content/uploads/2015/03/TL_redaction_these_20150302.pdf)
- 727 7. Couzy C, Dockes A-C. Are farmers businesspeople? Highlighting transformations in the  
728 profession of farmers in France. Int J Entrep Small Bus [Internet]. 2008;6(3):407–20. Available  
729 from:  
730 [http://www.inderscience.com/search/index.php?action=record&rec\\_id=19135&prevQuery=&ps=10&m=or](http://www.inderscience.com/search/index.php?action=record&rec_id=19135&prevQuery=&ps=10&m=or)  
731
- 732 8. SPW Environnement Agriculture Ressources naturelles, Département de l'Etude du Milieu  
733 naturel, Direction de l'Analyse Économique et agricole. Agriculture Evolution de l'économie  
734 agricole et horticole de la Wallonie 2013-2014. 2013.
- 735 9. Cournut S, Rapey H, Nozières MO, Pocard-Chapuis, R., Corniaux C, Choisis JP, et al.  
736 Dynamics of livestock farming in extensive livestock farming territories : what processes are  
737 going on ? In: 10th European IFSA Symposium. Aarhus, Denmark; p. Unpaginated Ref. 26.

- 738 10. FAO. Livestock's Long Shadow. Environ issues options. 2006;1.
- 739 11. Napoléone M, Boutonnet JP, Corniaux C, Alavoine-Mornas F, Barrिताux V, Carvalho S, et al.  
740 Between local and global : which reconfiguration within Dairy Basins ? A comparative analysis  
741 from North & South case-studies. In: 10th European Social Science History Conference. Vienna,  
742 Austria; 2014. p. 1–12.
- 743 12. Bergevoet RHM, Ondersteijn CJM, Saatkamp HW, Van Woerkum CMJ, Huirne RBM.  
744 Entrepreneurial behaviour of dutch dairy farmers under a milk quota system: Goals, objectives  
745 and attitudes. Agric Syst. 2004;80(1):1–21.
- 746 13. Methorst RG (Ron.), Roep D (Dirk), Verhees FJHM (Frans.), Verstegen JAAM (Jos. Differences  
747 in farmers' perception of opportunities for farm development. NJAS - Wageningen J Life Sci  
748 [Internet]. 2017;81:9–18. Available from: <http://dx.doi.org/10.1016/j.njas.2017.02.001>
- 749 14. Weltin M, Zasada I, Franke C, Piorr A, Raggi M, Viaggi D. Analysing behavioural differences of  
750 farm households: An example of income diversification strategies based on European farm  
751 survey data. Land use policy [Internet]. 2017;62:172–84. Available from:  
752 <http://dx.doi.org/10.1016/j.landusepol.2016.11.041>
- 753 15. Verhees F, Malak-Rawlikowska A, Stalgiene A, Kuipers A, Klopčič M. Dairy farmers' business  
754 strategies in Central and Eastern Europe based on evidence from Lithuania, Poland and  
755 Slovenia. Ital J Anim Sci [Internet]. 2018;17(3):755–66. Available from:  
756 <https://doi.org/10.1080/1828051X.2017.1422154>
- 757 16. Salou T, van der Werf HMG, Levert F, Forslund A, Hercule J, Le Mouël C. Could EU dairy quota  
758 removal favour some dairy production systems over others? The case of French dairy production  
759 systems. Agric Syst [Internet]. 2017;153:1–10. Available from:  
760 <http://dx.doi.org/10.1016/j.agsy.2017.01.004>
- 761 17. Palm R. L'analyse à correspondances multiples : principes et application. Notes Stat  
762 d'informatique. 2007;
- 763 18. Benzécri JP. Sur le calcul des taux d'inertie dans l'analyse d'un questionnaire. Cah l'analyse des  
764 données. 1979;4:377–8.

- 765 19. Everitt BS, Landau S, Leese M, Stahl D. Cluster Analysis, 5th Edition. Shewhart WA, Wilks SS,  
766 editors. Wiley; 2011. 1–330 p.
- 767 20. Service Public de Wallonie. La Carte des Sols de Wallonie [Internet]. Available from:  
768 <http://geoportail.wallonie.be/catalogue/ce3b6602-1c52-483f-9133-770009cdd02b.html>
- 769 21. SPW Environnement Agriculture Ressources naturelles, Agricole, Département de l'Etude du  
770 Milieu naturel, Direction de l'Analyse Économique et agricole. Evolution de l'économie agricole  
771 et horticole de la Wallonie 2017. 2017.
- 772 22. De Haan C. Smallholder dairy production. In: Agriculture Investment Sourcebook. 2011. p. 169–  
773 73.
- 774 23. USDA/ERS. The U. S. Dairy Industry, A Vital Contributor To Economic Development. 2014.
- 775 24. González JJ, Gómez Benito C. Profession and identity. The case of family farming in Spain.  
776 *Sociol Ruralis*. 2001;41(3):343–57.
- 777 25. Mooney PH. My own boss? Class, Rationality, and the Family Farm. Boulder. 1988.
- 778 26. Hostiou N, Chauvat S, Cournut S. Faire face à des questions de travail : les leviers mobilisés par  
779 des éleveurs laitiers. In: INRA, editor. L'agriculture en famille : travailler, réinventer, transmettre  
780 [Internet]. Paris France; 2015. p. 125–43. Available from:  
781 [http://open.edpsciences.net/index.php?option=com\\_content&view=article&id=290&Itemid=311](http://open.edpsciences.net/index.php?option=com_content&view=article&id=290&Itemid=311#008)  
782 #c008
- 783 27. Cournut S, Servièrre G, Hostiou N, Chauvat S, Dedieu B. L'organisation du travail en exploitations  
784 familiales d'élevage. Enseignements d'une analyse comparée conduite en France, en Amérique  
785 latine et au Vietnam. *Cah Agric*. 2010;19:338–47.
- 786 28. Garcia-Martinez A, Olaizola A, Bernués A. Trajectories of evolution and drivers of change in  
787 European mountain cattle farming systems. *Animal*. 2009;3:152–65.
- 788 29. Mc Elwee G, Robson A. Diversifying the farm: opportunities and barriers. *Finnish J Rural Res*  
789 *Policy*. 2005;4:84–96.
- 790 30. Dockes A-C, Couzy C, Daridan D, Gallot S, Magdelaine P, Pilorgé E, et al. Transformation de  
791 l'agriculture et des métiers des agriculteurs: quelles conséquences pour les organismes de

- 792 Développement ? In: Journées INRA-SFER de recherches en sciences sociales. 2007. p. 18.
- 793 31. Lémery B. Les agriculteurs dans la fabrique d'une nouvelle agriculture. *Sociol Trav.*  
794 2003;45(1):9–25.
- 795 32. Constance DH, Choi JY, Lyke-Ho-Gland H. Conventionalization, bifurcation, and quality of life:  
796 certified and non-certified organic farmers in Texas. *South Rural Sociol* [Internet].  
797 2008;23(1):208–34. Available from: [http://ag.auburn.edu/auxiliary/srsa/pages/Articles/SRS\\_2008\\_23\\_1\\_208-234.pdf](http://ag.auburn.edu/auxiliary/srsa/pages/Articles/SRS_2008_23_1_208-234.pdf)  
798 23 1 208-234.pdf
- 799 33. Stassart PM, Jamar D. Agriculture biologique et verrouillage des systèmes de connaissances  
800 Conventionalisation des filières agroalimentaire bio1. *Innov Agron.* 2009;2009(4):313–28.
- 801 34. Rosin C, Campbell H. Beyond bifurcation: Examining the conventions of organic agriculture in  
802 New Zealand. *J Rural Stud* [Internet]. 2009;25(1):35–47. Available from:  
803 <http://dx.doi.org/10.1016/j.jrurstud.2008.05.002>
- 804 35. Dalcq A-C, Beckers Y, Wyzen B, Reding E, Delhez P, Soyeurt H. Behavior patterns to the  
805 intensification vary differently within dairy producers. In: *Proceedings of the 69th EAAP meeting.*  
806 *Dubrovnik; 2018.*
- 807 36. Samson GS, Gardebroek C, Jongeneel RA. Explaining production expansion decisions of Dutch  
808 dairy farmers. *NJAS - Wageningen J Life Sci* [Internet]. 2016;76:87–98. Available from:  
809 <http://dx.doi.org/10.1016/j.njas.2015.11.007>
- 810 37. Mc Elwee G. The enterprising farmer: a review of entrepreneurship in agriculture. *J R Agric Soc*  
811 *Engl* [Internet]. 2006;January:1–9. Available from:  
812 [https://www.academia.edu/2832784/The\\_enterprising\\_farmer\\_a\\_review\\_of\\_entrepreneurship\\_i](https://www.academia.edu/2832784/The_enterprising_farmer_a_review_of_entrepreneurship_in_agriculture)  
813 [n\\_agriculture](https://www.academia.edu/2832784/The_enterprising_farmer_a_review_of_entrepreneurship_in_agriculture)
- 814 38. Methorst R, Roep D, Verstegen J, Wiskerke JSC. Three-fold embedding: Farm development in  
815 relation to its socio-material context. *Sustainability.* 2017;9(10):1–19.
- 816 39. Keizer TH, Emvalomatis G. Differences in TFP growth among groups of dairy farms in the  
817 Netherlands. *NJAS - Wageningen J Life Sci* [Internet]. 2014;70:33–8. Available from:  
818 <http://dx.doi.org/10.1016/j.njas.2014.03.001>

- 819 40. Groeneveld A, Peerlings J, Bakker M, Heijman W. The effect of milk quota abolishment on farm  
820 intensity: Shifts and stability. *NJAS - Wageningen J Life Sci* [Internet]. 2016;77:25–37. Available  
821 from: <http://dx.doi.org/10.1016/j.njas.2016.03.003>
- 822 41. Willock J, Deary IJ, Edwards-Jones G, Gibson GJ, McGregor MJ, Sutherland A, et al. The Role  
823 of Attitudes and Objectives in Farmer Decision Making: Business and Environmentally-Oriented  
824 Behaviour in Scotland. *J Agric Econ* [Internet]. 1999;50(2):286–303. Available from:  
825 <http://doi.wiley.com/10.1111/j.1477-9552.1999.tb00814.x>
- 826 42. Zasada I, Piorr A. The role of local framework conditions for the adoption of rural development  
827 policy: An example of diversification, tourism development and village renewal in Brandenburg,  
828 Germany. *Ecol Indic* [Internet]. 2015;59:82–93. Available from:  
829 <http://dx.doi.org/10.1016/j.ecolind.2015.02.002>
- 830 43. Dufour A, Hostiou N, Cournut S, Dedieu B. Work organization on the dairy farm : visions of labour  
831 , working units and type of management varied. In: *Rencontre Recherche Ruminants*. Paris; p.  
832 385–8.
- 833 44. Hansson H, Richard F, Olofsson C. Understanding the diversification and specialization of farm  
834 businesses. *Agric Food Sci* [Internet]. 2010;19:269–83. Available from:  
835 <https://journal.fi/afs/article/view/5689>
- 836 45. Müller B. My own boss? Strategies of resistance and accommodation of rural producers to  
837 neoliberal governance. *Anthropologica* [Internet]. 2010;52(2):233–6. Available from:  
838 <http://ezproxy.library.uvic.ca/login?url=http://search.ebscohost.com/login.aspx?direct=true&db=psyh&AN=2010-25464-002&site=ehost-live&scope=site%5Cnbnmuller@msh-paris.fr>  
839
- 840

## Multiple Correspondence Analysis

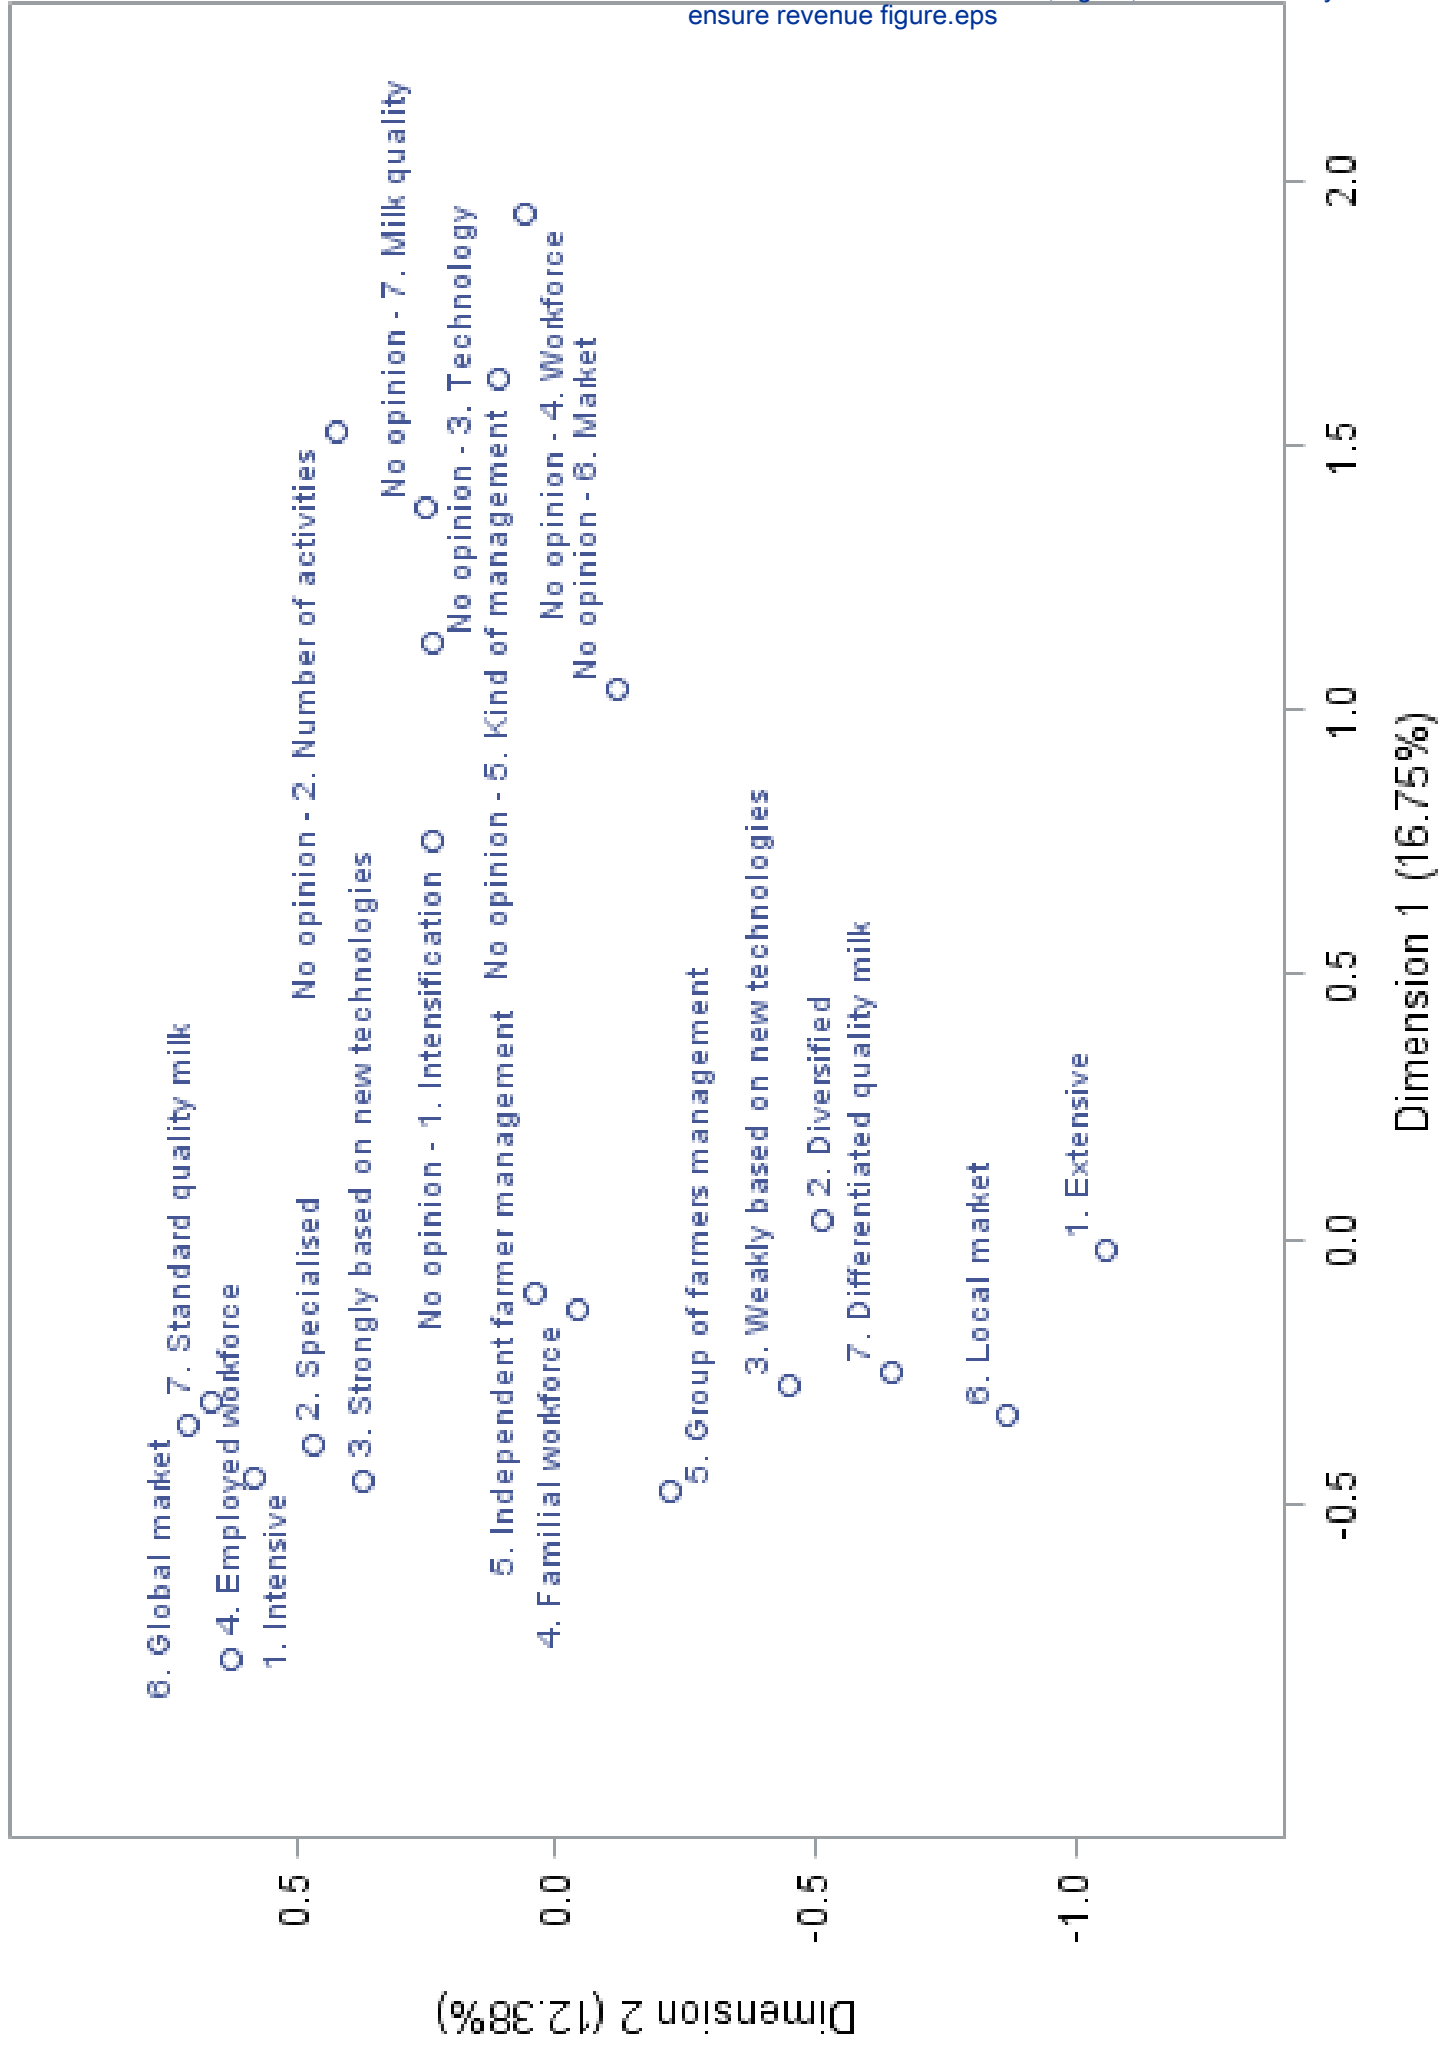

Figure 2

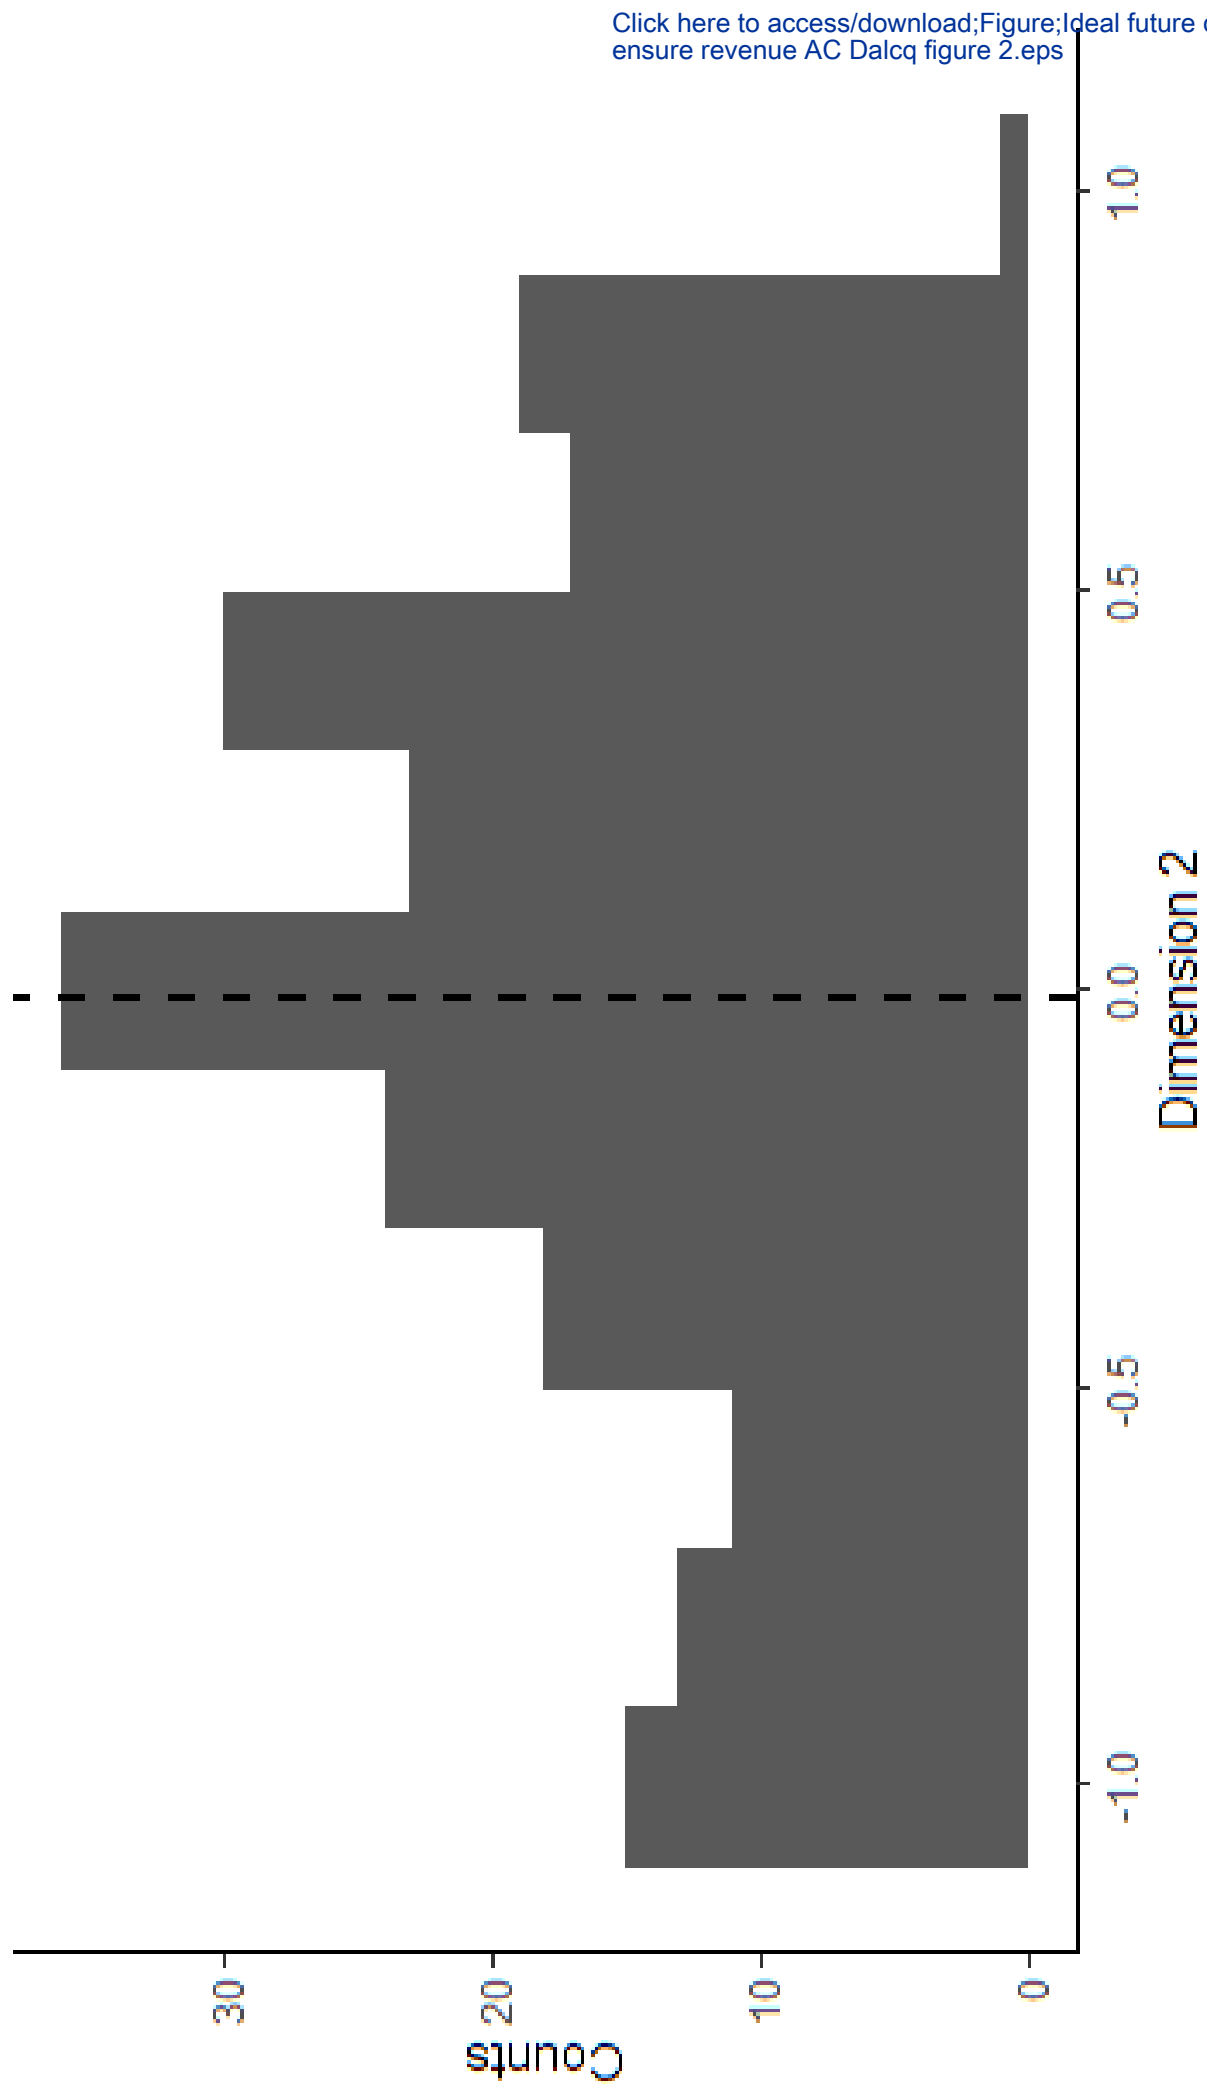



Click here to access/download  
**Supporting Information**  
letter Ethics comittee.PNG



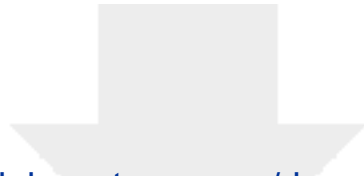

Click here to access/download  
**Supporting Information**  
S1 Appendix.docx

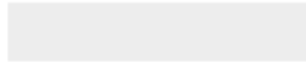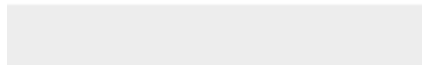

# 1 **How do dairy farmers wish their future farm?**

2 Anne-Catherine Dalcq<sup>1\*</sup>, Thomas Dogot<sup>1</sup>, Yves Beckers<sup>1</sup>, Yves Brostaux<sup>1</sup>, Eric  
3 Froidmont<sup>2</sup>, Frédéric Vanwindekens<sup>2</sup>, Hélène Soyeurt<sup>1</sup>

4 <sup>1</sup> University of Liège, Gembloux Agro-Bio Tech, TERRA Teaching and Research  
5 Centre, Passage des Déportés 2, 5030 Gembloux, Belgium

6 <sup>2</sup> Walloon Research Centre, Rue du Liroux, 8, 5030 Gembloux, Belgium

7

8 \*Corresponding author

9 E-mail : [anne-catherine.dalcq@uliege.be](mailto:anne-catherine.dalcq@uliege.be) (ACD)

10 Ideal future dairy farms to ensure revenue

## 11 **Abstract**

12 Dairy farming systems are evolving. This study presents dairy producers' perceptions  
13 of their ideal future farm (**IFF**) to ensure revenue, and attempts to determine the  
14 reasons for this choice, the environmental aspects related to this choice, the proximity  
15 between the current farm and the IFF and the requirements for reaching this IFF. Just  
16 before the end of the European milk quota, a total of 245 Walloon dairy producers  
17 answered a survey about the characteristics of their IFF and other socio-  
18 environmental-economic information. A multiple correspondence analysis (**MCA**) was  
19 carried out using seven characteristics of the IFF (intensive vs. extensive, specialised  
20 vs. diversified, strongly vs. weakly based on new technologies, managed by a group  
21 of managers vs. an independent farmer, employed vs. familial workforce, local vs.  
22 global market, standard vs. quality-differentiated production) to observe the

23 relationships between them. Based on the main contributors to the second dimension  
24 of the MCA, this axis was defined as an IFF gradient between the local-based  
25 extensive (**LBE**) producers (26%) and the global-based intensive (**GBI**) producers  
26 (46%). The differences of IFF gradient between modalities of categorical variables  
27 were estimated using generalised linear models. Pearson correlations were calculated  
28 between the scores on the IFF gradient and quantitative variables. Finally, frequencies  
29 of IFF characteristics and the corresponding characteristic for the current situation  
30 were calculated to determine the percentages of “unhappy” producers. Some reasons  
31 for the choice of IFF by the producers have been highlighted in this study.  
32 Environmental initiatives were more valued by LBE than GBI producers. Low similarity  
33 was observed between the current farm situation of the respondents and their IFF  
34 choice. LBE and GBI producers differed significantly regarding domains of formation  
35 (technical and bureaucratic vs. transformation and diversification respectively) and  
36 paths of formation (non-market vs. market respectively). Two kinds of farming systems  
37 were considered by dairy producers and some socioeconomic and environmental  
38 components differed between them.

39

## 40 Introduction

41 Food is a basic need. Working to provide food for themselves and their family  
42 was the task of everyone at the dawn of humanity. The progressive organisation of  
43 society during the Neolithic period has led to the appearance of “producers” who are  
44 responsible for producing food for more than just themselves and their family (1,2).  
45 Since World War II, public policies have been set up to increase food production (3).  
46 These policies impacted the development of producers and their farms in the European  
47 Union. In the southern part of Belgium, the mean number of cows and the mean  
48 agricultural area per producer increased between 1980 and 2017 from 20 to 66 heads  
49 and from 25 to 71 hectares, respectively (4).

50 Producers are now facing great challenges to stay profitable. The price of the  
51 inputs (e.g. buildings, agricultural machinery, installations, feeding, veterinary care) of  
52 dairy production (**DP**) are increasing while the milk price shows great variability and its  
53 inflation is not similar to that observed for the inputs (5,6). Moreover, the European  
54 Union has decreased financial support to farmers (7). On 1<sup>st</sup> April 2015, the European  
55 Union removed the quota system which had managed the supply of DP (8). This led to  
56 greater milk price volatility. Additionally, sanitary crises such as mad cow disease  
57 (bovine spongiform encephalopathy (BSE)) and the dioxine crisis, among others, have  
58 shocked consumers and led to new rules and regulations at European level and to the  
59 creation of food security agencies in its countries. Moreover, these episodes modified  
60 consumers’ behaviours regarding their food purchases, they asked for more  
61 transparency and directed themselves towards organic food or local chains (9).  
62 Besides the economic view, the impacts of farming on the environment have been  
63 noted and policies have been set up in the Common Agricultural Policy to solve these  
64 problems (6,10).

65 In this context, the question often asked by dairy producers and stakeholders of  
66 the dairy sector is what the future of dairy farming entails, how to remain profitable and  
67 more generally sustainable. Several authors, such as Napoléone *et al.* (11), Havet *et*  
68 *al.* (5) and Lebacqz (6), have studied the evolution of dairy farming and the present dairy  
69 systems, finding trends that exist in the sector. For instance, the project Mouve, funded  
70 by the French National Research Agency, studied the evolution of dairy farming  
71 systems in 6 dairy basins around the world. Their results gathered the publications of  
72 Napoléone *et al.* (11) and Havet *et al.* (5). Moreover, some other authors (e.g.,  
73 Bergevoet *et al.* (12), Methorst *et al.* (13), Weltin *et al.* (14) and Verhees *et al.* (15)  
74 have studied the future paths of development considered by dairy producers. These  
75 studies were performed on the basis of data from 2001 to the beginning of 2013. They  
76 explored some reasons for these choices for the future.

77 This study is innovative as it asks what is the ideal future farm (IFF) perceived by the  
78 dairy farmers to ensure revenue. To our knowledge this question is not present in other  
79 studies. Moreover, respondent producers were asked not to take into account their  
80 current farm when considering their IFF. The data collection was conducted more  
81 recently, at the end of 2014 and the beginning of 2015. This was a particular context,  
82 just before the quota removal, when producers had this new perspective in mind. This  
83 change implied the disappearance of regulation of dairy supplies and was bringing  
84 uncertainty about the milk price. ~~caused volatility and decrease in the milk price~~ (16).

85 We have assumed that this change in their working framework impacted respondents  
86 reflections and led them to reconsider their strategies, taking into account this new  
87 reality. They had just faced two important milk crises associated with low milk price in  
88 2009 and an increase of the cost of inputs in 2012. This research studied  
89 unprecedented reasons for the choice of IFF compared to what is present in the

90 literature, to our knowledge, such as past events of the farms. Moreover, the present  
91 study explored the environmental and training aspects linked to this IFF vision. The  
92 environmental aspect is of high importance at a time of increasing awareness of the  
93 impacts of agriculture and breeding on the environment such as carbon footprints,  
94 biodiversity, etc. The topic of trainings for dairy producers was studied to orientate  
95 universities and other stakeholders of breeding improvement towards the domains  
96 needed and desired by dairy producers. A comparison between the current farm and  
97 the IFF of the respondent was realised, and permitted the difference between the  
98 reality and the aspiration of the producers to be studied. More specifically, the goals of  
99 this study were to answer the following questions: (1) What is the perception of dairy  
100 producers of their IFF? (2) How do dairy producers distribute themselves between IFF  
101 highlighted? What is the proportion of producers desiring the different IFF? By  
102 gathering different kinds of information, of which some are novel or rarely present in  
103 the literature, this study also answered to the following questions: (3) How do farmers  
104 decide on their IFF? (4) How do environmental aspects factor into IFF decisions? (5)  
105 Which paths and themes for training do farmers want in order to reach their desired  
106 IFF? And, ultimately, (6) how do farmers' IFF compare to their current dairy farming  
107 systems?

108

109

## 110 **Materials and methods**

### 111 **Survey and IFF typology**

112 In 2014, moving towards the end of the quota, as stakeholders of the dairy sector  
113 (research centre, agricultural sciences faculty, breeding association, agricultural  
114 unions, etc.), we wanted to know how the dairy producers of the southern part of  
115 Belgium will react to this change. We created a survey using LimeSurvey software  
116 (version 3.15.1+181017, LimeSurvey GmbH, Hamburg, Germany), which provides an  
117 internet link to get access and to complete the survey. The survey was first pre-tested  
118 orally with two dairy producers to estimate its duration and its clarity. **The Board of**  
119 **Ethics and Scientific Integrity of the University of Liege waives the need for ethical**  
120 **approval.** We communicated with Walloon dairy producers about the goals of the  
121 survey and its access **broadly via all communication ways towards them : specialised**  
122 **press, agricultural internet websites, Unions and also** advertisements through the milk  
123 payment letter which is sent to all the Walloon dairy producers once a month. The  
124 survey **written in French** can be viewed at the following internet link:  
125 <https://www.gembloux.ulg.ac.be/enquete/index.php/219425?lang=fr> **and its English**  
126 **translation is viewable in the Appendix.**

127 A total of 245 producers completed our survey between November 2014 and January  
128 2015.

129 The entire survey was composed of 127 questions where the answers were  
130 decomposed into 498 categorical and 44 quantitative variables.

131 The question **'Without taking into account your current farm**, what is, according to you,  
132 the ideal future farm to ensure a revenue?" was proposed to the producers and they

133 ~~must~~ ~~could~~ choose between short propositions on seven items: 1) intensive or  
134 extensive production; 2) specialised or. diversified activity (or activities); 3) farming  
135 strongly or weakly based on new technologies; 4) farm managed by an independent  
136 farmer or a group of managers; 5) family or employed workforce; 6) providing  
137 production for local or global markets; 7) providing standard or differentiated quality  
138 production. The modality “no opinion” was available for each IFF question. Counts  
139 were calculated for all modalities of these seven sub-questions.

140 The first step was to study if there were relationships between all modalities derived  
141 from the seven sub-questions asked. To achieve this objective, a multiple  
142 correspondence analysis (**MCA**) was carried out as the variables were categorical. For  
143 a MCA, the eigenvalue of the dimensions generated, named principal inertia, is a  
144 biased measure of the amount of information presented by a dimension (17). Corrected  
145 inertia rates were calculated, as described by Benzécri (18), to quantify the correct  
146 proportion of information of a dimension.

147 Classes were established to study the distribution of producers along the dimensions  
148 of the MCA. The interval between the 1% percentile and the 99% percentile of each  
149 dimension was divided equally into five classes. Then, the individuals per class were  
150 counted.

151 To exclude a group of producers with ~~some particular~~ characteristics if necessary,  
152 cluster analysis with the WARD method was used on the scores of the individuals on  
153 each dimension of the MCA. **The WARD method is a hierarchical agglomerative**  
154 **method (19). The principle of this kind of method is to put initially the n individuals in n**

155 groups and then to agglomerate the groups. The algorithm of WARD makes it in such  
156 a way that the gatherings induce the lowest decrease of  $R^2$  at each step.

157 If a group of producers was excluded, its characteristics were previously studied  
158 against the remaining producers. The level of significance of the difference of the  
159 quantitative characteristics between the excluded and the remaining producers was  
160 studied thanks to general linear models. The level of significance of the difference of  
161 the proportions for each modalities of the qualitative characteristics between the  
162 excluded and the remaining producers was studied thanks to tests of proportions.

### 163 **Characterisation of IFF choice**

164 To describe the dairy producers in terms of their IFF, the scores on MCA dimensions  
165 were studied as a function of other variables extracted from the survey. This method  
166 was chosen instead of the creation of classes, possible with the Latent Class Analysis  
167 method or the Numerical Classification on the scores of MCA (Hierarchical Clustering  
168 on Principal Components). This choice was motivated by the wish to not put the  
169 producers in boxes but to study their position on a gradient between potential extreme  
170 models identified along the dimension.

171 The other variables extracted from the survey whose the relationships with the  
172 dimension are studied were distributed within several themes. These were the effect  
173 of past crises, problems encountered by the farmer, production factors, age of the  
174 farmer, breed of the cow, diversification of activities and alternative valorisation,  
175 regrouping between producers, consideration of mechanisation and robotisation on the  
176 farm, the reaction of the farmer to external factors, the considerations of farmers about  
177 environmental aspects, climatic hazards, ways to reach the ideal formation and field of  
178 formation. For categorical variables, the scores of MCA dimensions were modelled

179 using these variables as a fixed effect in a generalised linear model. Least squares  
180 means were estimated for the two-by-two comparisons using the Tukey test. The level  
181 of significance of those differences was assessed based on the *P*-value of the test. For  
182 quantitative variables, Pearson correlation coefficients were calculated between the  
183 scores of MCA dimensions and these variables. Their corresponding *P*-values were  
184 estimated to observe if the correlation values were significantly different from 0.

185 To observe if dairy producers presented the farming characteristics they considered to  
186 be ideal at the moment of survey, absolute frequencies (counts) were calculated as a  
187 function of each ideal future farm characteristic and of the answer to the question which  
188 corresponds to this corresponding characteristic for the current situation (Table 1).  
189 Moreover, the percentage of “unhappy” producers was calculated as the ratio between  
190 the producers not currently in the situation that they consider as ideal and the total  
191 number of producers.

192 All editing and statistical analyses were carried out using SAS software (version  
193 9.4., SAS Inst. Inc., Cary, NC, USA).

194 **Table 1. Absolute frequencies (counts) of producers as a function of their answer to the ideal future farm characteristic and**  
 195 **the corresponding characteristic for the current situation and percentage of “unhappy” producers (i.e., percentage of**  
 196 **producers not currently in the situation that they consider to be ideal) (N = 245)**

197 <sup>1</sup> Frequency in grey box corresponds to producers not currently in the situation that they consider as ideal regarding this characteristic

|                                  |                                                                | Corresponding characteristic for the current situation |                                                                               | % of “unhappy” producers                                                     |  |
|----------------------------------|----------------------------------------------------------------|--------------------------------------------------------|-------------------------------------------------------------------------------|------------------------------------------------------------------------------|--|
|                                  |                                                                | >2 cows per hectare of grass                           | <2 cows per hectare of grass                                                  |                                                                              |  |
| Ideal future farm characteristic | Intensive                                                      | 38                                                     | 66 <sup>1</sup>                                                               | 50%                                                                          |  |
|                                  | Extensive                                                      | 22                                                     | 51                                                                            |                                                                              |  |
|                                  |                                                                |                                                        | Only dairy production activity                                                | Presence of activities other than dairy production                           |  |
|                                  | Specialised                                                    | 46                                                     | 59                                                                            | 37%                                                                          |  |
|                                  | Diversified                                                    | 23                                                     | 93                                                                            |                                                                              |  |
|                                  |                                                                |                                                        | Presence of milking robot or agricultural equipment for a better technicality | Absence of milking robot or agricultural equipment for a better technicality |  |
|                                  | Strongly based on new technologies                             | 33                                                     | 52                                                                            | 37%                                                                          |  |
|                                  | Weakly based on new technologies                               | 16                                                     | 85                                                                            |                                                                              |  |
|                                  |                                                                |                                                        | >1 chief operating officer or associates                                      | 1 chief operating officer                                                    |  |
|                                  | Managed by a group of managers                                 | 20                                                     | 25                                                                            | 42%                                                                          |  |
|                                  | Managed by an independent farmer                               | 68                                                     | 108                                                                           |                                                                              |  |
|                                  |                                                                |                                                        | Presence of workers (i.e., external person to family working on the farm)     | No workers                                                                   |  |
|                                  | With family workforce                                          | 17                                                     | 195                                                                           | 10%                                                                          |  |
|                                  | With employed workforce                                        | 7                                                      | 6                                                                             |                                                                              |  |
|                                  | Providing dairy production for local vs. global market         |                                                        | No corresponding characteristic                                               |                                                                              |  |
|                                  | Providing standard vs. differentiated quality dairy production |                                                        | No corresponding characteristic                                               |                                                                              |  |

## 198 **Results and discussion**

### 199 **Data representativeness**

200 The sample set of 245 producers represented 6.1% of the dairy producers in Wallonia  
201 (about 4,000 dairy producers in 2015 and 3,500 in 2017 (4)). The density of dairy farms  
202 throughout Wallonia was well represented in the sample, with a higher answer rate in  
203 the provinces more populated with dairy farms. More answers were obtained in the  
204 east part of Wallonia, where a higher density of dairy farms exists due to the grazing  
205 landscape that is particularly suitable for dairy production. Wallonia is a highly  
206 heterogeneous region with regard to soil and geological characteristics (20).

207 Dairy producers of the survey declared a mean of 79 cows and 86ha. Dairy production  
208 was their unique activity for 33% of them. The mean number of dairy cows per Walloon  
209 dairy farm was 52.9 cows in 2015 (21). No regional statistic exists on the mean  
210 agricultural area of all producers that perform a dairy activity. The mean agricultural  
211 area of specialised dairy farms and of all kind of farms taken together equated to 61.98  
212 ha and 55.8 ha, respectively (21). So, the producers surveyed tended to have bigger  
213 farms regarding herd size and agricultural area than the average Walloon farm that  
214 have dairy activity.

### 215 **What is the perception of dairy producers of their ideal** 216 **future farm?**

#### 217 **Univariate approach**

218 As mentioned previously, the first aim of this study was to highlight the perceptions of  
219 Walloon dairy producers of their ideal farm, just before the end of the milk quota. This

220 was done through the answers to 7 sub-questions. Table 2 shows the frequency for  
 221 each modality of those questions.

222 **Table 2 Percentages of responses to the seven questions about the ideal future**  
 223 **farm (N = 245)**

| Question                                                                                                                                         | Proposition            | Percentage (%) |
|--------------------------------------------------------------------------------------------------------------------------------------------------|------------------------|----------------|
| Without taking into account your current farm, what is, according to you, the ideal future farm to ensure a revenue?"<br>Intensive vs. extensive | Intensive              | 43             |
|                                                                                                                                                  | Extensive              | 30             |
|                                                                                                                                                  | No opinion             | 27             |
| Specialised vs. diversified                                                                                                                      | Specialised            | 43             |
|                                                                                                                                                  | Diversified            | 47             |
|                                                                                                                                                  | No opinion             | 10             |
| Strongly vs. weakly based on new technologies                                                                                                    | Strongly               | 35             |
|                                                                                                                                                  | Weakly                 | 41             |
|                                                                                                                                                  | No opinion             | 24             |
| Managed by an independent farmer vs. a group of managers                                                                                         | Independent farmer     | 72             |
|                                                                                                                                                  | Group of managers      | 18             |
|                                                                                                                                                  | No opinion             | 10             |
| Family vs. employed workforce                                                                                                                    | Family                 | 87             |
|                                                                                                                                                  | Employed               | 5              |
|                                                                                                                                                  | No opinion             | 8              |
| Providing dairy production for local vs. global market                                                                                           | Global                 | 43             |
|                                                                                                                                                  | Local                  | 32             |
|                                                                                                                                                  | No opinion             | 25             |
| Providing standard vs. differentiated quality dairy production                                                                                   | Standard               | 38             |
|                                                                                                                                                  | Differentiated quality | 45             |
|                                                                                                                                                  | No opinion             | 17             |

224

225 Contrasting opinions of dairy farmers were observed for almost all questions except  
 226 for the type of management and the kind of workforce: 71.84% of the respondents  
 227 wanted an independent farmer management, and 86.53% focused on a family  
 228 workforce (Table 2). These results highlight a will in the southern part of Belgium to  
 229 maintain the traditional structure of work organisation in the future, with family  
 230 workforce and one director of operations. More globally in the world, dairy farms are  
 231 still mostly owned and managed by a family structure, whatever the degree of  
 232 development of the country (22,23). The choice of producers to work by themselves  
 233 and not to deal with workers (i.e., an external person to the family employed on the

234 farm) was noted in other studies. For example in Spain Gonzalez and Gomez (24)  
235 observed, when asking 3,370 farmers for their definition of a farmer, that more than  
236 half of them chose labourer and 12% chose businessman. In the USA in 1988, Mooney  
237 presented the fact that farmers had a particular status, being workers and employing  
238 other workers (25).

239 From Table 2, it is interesting to note that the highest percentages of abstention were  
240 observed for the questions about intensive vs. extensive, strongly vs. weakly based on  
241 new technologies, and providing DP for local vs. global markets. These results show  
242 that a quite significant proportion of the respondents did not take a position on these  
243 directions for the evolution of dairy farms.

## 244 **Multivariate approach**

245 To study the relationships between the answers given by the respondents to all  
246 questions about IFF, a MCA was performed as the related variables were categorical  
247 (Table 2). The percentage of principal inertia of the dimensions 1 and 2 of MCA were  
248 16.75% and 12.38%, respectively (Fig 1). The value of corrected inertia for the two first  
249 dimensions reached 72.7% and 21.5% respectively, gathering almost 95% of the  
250 information.

251 **Fig 1. Representation of the modalities in the multiple correspondence analysis**  
252 **first factorial plan.** Values of principal inertia reached 16.75% and 12.38%. Values of  
253 corrected inertia reached 72.7% and 21.5%.

254 The first dimension of MCA showed positive relationships with the modalities no  
255 opinion of each characteristic and negative relationships with all the modalities with an  
256 opinion. Thus, the first dimension of the MCA allowed permitted differentiation between  
257 the producers who did not give their opinion concerning characteristics of IFF and the

258 producers who did (Fig 1). Cluster analysis was used to isolate the group of producers  
259 with a lot of 'no opinion' answers to the seven questions : this formed the first  
260 separation of classes of the analysis, dividing the "no-opinion" producers (15%) from  
261 the others (85%). The no opinion producers cluster (N = 38) was removed from the  
262 analysis to avoid potential bias coming from farmers who did not have a clear vision of  
263 their IFF.

264 Detailed information about this group is available in Tables 3 and 4. They tended to be  
265 older farmers (45-54 years), who came from Liège, which is a historic dairy region  
266 (Table 3). Even if it is not significant ( $P = 0.27$ ), they are less likely to have other animal  
267 production on the farm (Table 3). Percentages of grass and corn silage observed for  
268 this group highlighted a same way means of feeding as the complete sample (Table  
269 4). Even if these differences are not significantly different ( $P = 0.20$ ,  $P = 0.59$ ,  $P = 0.33$ ),  
270 the more represented single breed and the lower number of cows but with the higher  
271 milk delivery quota of the no-opinion producers tended to express quite technical and  
272 high performing producers in this the no-opinion group. They were more less, even if  
273 not significant, to plan not projecting to keep constant increase their production (Table  
274 3). Even if not significant ( $P = 0.32$ ), they declared more investment in the next five  
275 years than the complete sample, but even if no difference of investment was observed  
276 since 2009. They seemed to be people who have been dairy producers for a long time.  
277 We could assume that their farms had good economic performances and did not lead  
278 them to think about evolution in response to a great change (*i.e.* the quota removal).  
279 Maybe they could also be 'asleep' in their old dairy traditions.

280 **Table 3 Percentages of producers as a function of modalities of categorical**  
281 **variables for the no-opinion producers and the complete sample.**

| %                                                          | Complete sample<br>N = 245 | No-opinion producers<br>N = 38 | Producers with an opinion<br>N = 207 | P<br>No-opinion vs. with opinion |
|------------------------------------------------------------|----------------------------|--------------------------------|--------------------------------------|----------------------------------|
| <b>Age (years)</b>                                         |                            |                                |                                      |                                  |
| 0-34                                                       | 18                         | 16                             | 19                                   | 0.64                             |
| 35-44                                                      | 31                         | 32                             | 31                                   | 0.98                             |
| 45-54                                                      | 37                         | 47                             | 35                                   | 0.15                             |
| 55-64                                                      | 13                         | 6                              | 15                                   | 0.027                            |
| <b>Geographical situation</b>                              |                            |                                |                                      |                                  |
| Walloon Brabant                                            | 6                          | 2                              | 6                                    | 0.24                             |
| Hainaut                                                    | 32                         | 34                             | 31                                   | 0.74                             |
| Liège                                                      | 34                         | 45                             | 32                                   | 0.14                             |
| Luxembourg                                                 | 10                         | 5                              | 11                                   | 0.20                             |
| Namur                                                      | 19                         | 13                             | 20                                   | 0.28                             |
| <b>Importance of dairy activity</b>                        |                            |                                |                                      |                                  |
| Unique activity                                            | 33                         | 34                             | 32                                   | 0.83                             |
| Preponderant activity                                      | 65                         | 61                             | 65                                   | 0.59                             |
| Secondary activity                                         | 3                          | 5                              | 2                                    | 0.45                             |
| <b>Herd breed</b>                                          |                            |                                |                                      |                                  |
| Single breed                                               | 33                         | 42                             | 31                                   | 0.20                             |
| Multi-breed                                                | 67                         | 58                             | 69                                   | 0.20                             |
| <b>Other animal production</b>                             |                            |                                |                                      |                                  |
| Yes                                                        | 45                         | 37                             | 46                                   | 0.27                             |
| No                                                         | 55                         | 63                             | 54                                   | 0.27                             |
| <b>Milk production evolution for in the next 5 years</b>   |                            |                                |                                      |                                  |
| Decrease                                                   | 2                          | 0                              | 2                                    | 0.043                            |
| Constant                                                   | 54                         | 63                             | 52                                   | 0.20                             |
| Increase                                                   | 38                         | 32                             | 40                                   | 0.33                             |
| Stop                                                       | 6                          | 5                              | 6                                    | 0.79                             |
| <b>Agricultural area investment since 2009</b>             |                            |                                |                                      |                                  |
| Yes                                                        | 46                         | 47                             | 46                                   | 0.88                             |
| No                                                         | 54                         | 53                             | 54                                   | 0.88                             |
| <b>Agricultural area investment in the next five years</b> |                            |                                |                                      |                                  |
| Yes                                                        | 57                         | 64                             | 55                                   | 0.27                             |
| No                                                         | 43                         | 36                             | 45                                   | 0.27                             |

282

283 **Table 4: Means of quantitative variables for no-opinion producers and the**  
 284 **complete sample**

|                           | Complete sample<br>N = 245 | No-opinion producers<br>N = 38 | Producers with an opinion<br>N = 207 | P<br>No-opinion vs. with opinion |
|---------------------------|----------------------------|--------------------------------|--------------------------------------|----------------------------------|
| Agricultural area (ha)    | 86                         | 87                             | 85                                   | 0.80                             |
| Percentage of corn silage | 15                         | 14                             | 15                                   | 0.67                             |
| Percentage of grass       | 61                         | 60                             | 60                                   | 0.76                             |
| Milk delivery quota (l)   | 558743                     | 632880                         | 545133                               | 0.33                             |
| Number of cows            | 79                         | 73                             | 81                                   | 0.59                             |

285

286 The second dimension of the MCA showed positive relationships with some modalities  
287 of the IFF characteristic and negative relationships with their opposite. Thus, this  
288 dimension seems ~~was the most interesting for highlighting to highlight~~ the wishes of  
289 dairy farmers about their IFF, for those who took a position on this question. More  
290 precisely, this axis showed a gradation of question modalities and proximity between  
291 several characteristics. The second dimension of the MCA was the most interesting for  
292 highlighting the wishes of dairy farmers about their IFF, for those who took a position  
293 on this question. This axis showed a gradation of question modalities and proximity  
294 between several characteristics. This dimension led to the identification of two extreme  
295 tendencies (Fig 1); the modalities of familial workforce, independent farmer  
296 management and management by a group of farmers were near to zero on this axis  
297 (Fig 1). This means that the small proportion of producers supporting group  
298 management was distributed between the two extreme tendencies observed. The  
299 position of the modalities of familial workforce and independent farmer at the middle of  
300 the second dimension illustrated the fact that these modalities were chosen by  
301 producers from the two tendencies identified. The small proportion of producers  
302 choosing an employed workforce was positioned at the top of the second dimension  
303 (Fig 1).

304 The first tendency, related to high scores on the second MCA dimension, corresponds  
305 to IFF with the following characteristics: global market, standard milk, intensive system,  
306 employed workforce, specialised and strongly based on new technologies. Other  
307 authors have observed the same relations. From a trial of 458 French dairy farms,  
308 Hostiou *et al.* (26) highlighted a profile of farmers which simultaneously gathered high  
309 equipment, intensification and workers. From a trial of 3,370 producers of all sectors  
310 in Spain, Gonzalez and Gomez Benito (24) collated the characteristics of large

311 holdings, market-orientated farming and management of workers. Cournut *et al.* (27)  
312 highlighted different ways of evolving dairy farming in France, characterised by  
313 workers, mechanisation and high equipment. This tendency in dairy farming systems  
314 is explained by the evolution of the dairy system (6). The increased competition in the  
315 dairy market caused by the creation of the open European market, as well as the wish  
316 of consumers to have structures that gather all the food supplies in one place (*i.e.* a  
317 supermarket) led to the concentration of dairy processing in a few big firms (11). These  
318 firms were better placed to develop because they could control their collection costs,  
319 benefit from scale economies and were able to deliver to supermarkets with regularity  
320 in quantity and with a standard quality (9). This state and the world market have  
321 conditioned milk prices for the producers. Increasing production, thanks to more cows  
322 or higher productivity, is a possible way to stay profitable, considering the undergone  
323 milk price (5,11). To achieve profitability, an elevated production of milk per cow and  
324 an increase of cows on the farm are reached (11). Moreover, this increase in milk  
325 production at farm level was also forced by the orientated production Common  
326 Agricultural Policy (**CAP**) primes, although CAP has limited help for the dairy sector.  
327 Therefore, all of these characteristics intensify the dairy farming system. Intensification  
328 was defined by Garcia-Martinez *et al.* (28) as the maximisation of the rarest factor,  
329 traditionally the agricultural area. The increase in DP per unit of agricultural area was  
330 possible thanks to intensive production of forage and purchase of inputs that are  
331 produced where production costs were the lowest, to balance the ration and to increase  
332 the production per cow, or the number of cows reared on a hectare of agricultural area  
333 and therefore DP per unit of agricultural area at the level of the farm (9,11). This  
334 intensification led to more specialised farms with more dairy cows and their entire  
335 workforce directed to this specialisation (9). The enlargement of farms required a

336 higher work rate; this was surmounted thanks to equipment and new technologies and  
337 to increased human workforce: collective organisation, subcontracting to private firms  
338 and employment of workers (9).

339 The second tendency, contrary to the first tendency, was characterised by high  
340 negative scores on the second MCA dimension. This axis was represented by the  
341 following modalities: weakly based on new technologies, diversified, differentiated  
342 quality milk, local market and extensive system (Fig 1). This reflects another form of  
343 dairy farming. This form is favoured by a constant increase in input prices, combined  
344 with a growing demand from consumers for high quality and local-based products (9).  
345 These dairy producers choose to work with greater self-sufficiency to be less  
346 dependent on the undergone input prices (9). The “localisation” of the production  
347 demanded by consumers was executed thanks to this more locally-produced forage  
348 and fewer inputs from outside (5). This return to self-sufficiency led to more extensive  
349 farming (5). The production induced was also often quality-differentiated and dedicated  
350 to local markets (9). Cournut *et al.* (9) showed in their study that this kind of dairy  
351 farming is chosen by a minority of farms, which are still diversified.

352 This gradation with two kinds of models at the extremities of the second MCA  
353 dimension was also described in other studies (5,6,9,11,29–31). They were named  
354 globalisation vs. territorialisation by Cournut *et al.* (9), or globalisation vs. localisation  
355 by Napoleone *et al.* (11). Lebacqz (6) identified a “dualisation of dairy farming systems  
356 between ‘a mainstream model’ focusing on an increasing farm size, production  
357 intensity and specialisation and alternative models involving initiatives deviating from  
358 this trend and constituting niche developments (niches = minor elements, hardly  
359 sustainable against the mainstream model)”. Thanks to a survey answered by 180  
360 producers of all sectors in 2007 in France, concerning the evolution of their farms and

361 their aspirations, Dockès *et al.* (30) also highlighted a major tendency towards the  
362 enlargement, professionalisation and specialisation of farms, but those authors also  
363 mentioned that other farms wanted to develop diversified structures, orientated  
364 towards the requests of society, processing and farm accommodation.

365 **How do dairy producers distribute themselves between the**  
366 **ideal future farms highlighted? ~~What is the proportion of~~**  
367 **~~producers desiring a different ideal future farm?~~**

368 The present study showed a bifurcation and quantified two ways: 46% vs. 26% of  
369 producers having high positive and high negative scores respectively on the second  
370 dimension (Fig 2). Verhees *et al.* (15) quantified producers as a function of their  
371 strategies of development, but solely regarding specialisation vs. diversification of their  
372 activity, 54.3% vs 15.1% respectively. The bifurcation phenomenon is also observed  
373 in the organic sector. Two models appeared: organic agriculture realised by historic  
374 actors and the other driven by the agribusiness to answer to a increasing organic  
375 demand (32–34).

376 **Fig 2. Distribution of the producers along the second dimension (the dotted line**  
377 **represents the mean score on the second dimension of the producers)(N = 207)**

378 **How do farmers decide on their ideal future farm?**

379 To study the relationships between the different IFF, the reasons for these and other  
380 interesting technico-economic information, the second dimension was considered as  
381 a gradient (**IFFg**) interpreted at the extremities as global-based intensive producers  
382 (GBI: high positive scores) and local-based extensive producers (LBE: high negative  
383 scores). The choice to work with a gradient rather than a clear separation of the two

384 tendencies was motivated by the will to not put dairy producers into boxes pigeonholes.  
385 The mean of the scores of the second MCA dimension was  $-0.012$  with a SD of  $0.053$ .  
386 Minimal and maximal values were  $-1.09$  and  $0.92$ , respectively.

387 Based on the interpretation of IFFg, a significant negative correlation indicates a higher  
388 relationship with the dairy producers desiring a LBE model. By opposition, a significant  
389 positive correlation means a higher link with the dairy producers desiring a GBI model.  
390 Tables 5, 7 and 8 give the results of generalised linear models where the categorical  
391 variables were introduced separately as a fixed effect in the model. Significantly lower  
392 estimates of IFFg for a specific modality of the considered categorical variable depicts  
393 a tendency of producers desiring a LBE model to choose this modality, while  
394 significantly higher estimates of IFFg means a tendency of producers wanting a GBI  
395 model to choose this modality. These analyses were conducted on the producers who  
396 have an opinion (N = 207). The following paragraphs will summarise the potential  
397 reasons driving the choice of IFF made by the Walloon dairy farmers.

398 ***Effect of past crisis on perceptions of the ideal future farm*** The producers that  
399 were impacted by past crises wished more for a LBE model (estimate =  $-0.17$ , Table  
400 5). This could be related to the suffering involved in the crisis and the wish to apply  
401 solutions in order to not repeat this situation: revenue from diversified activities, other  
402 outlets for the milk production sold (*i.e.* local market characteristic) and/or self-  
403 sufficiency to be less dependent on purchased feed (*i.e.* extensive farm characteristic).  
404 This is in agreement with a past finding (35). We observed a decrease in intensification  
405 in 2012 which was the year of a dairy economic crisis mainly related to an increase in  
406 the price of inputs.

407 **Table 5 Value and level of significance of the difference in the ideal future farm**  
408 **gradient as a function of modalities of categorical variables: Reasons (N = 207)**

Means with different letters are significantly different.

| <b>Categorical variable</b>                                                           | <b>Modality and estimate</b> |                     |                            |        |          | <b>P</b> |
|---------------------------------------------------------------------------------------|------------------------------|---------------------|----------------------------|--------|----------|----------|
| <b>Past crisis</b>                                                                    |                              |                     |                            |        |          |          |
| Presence of deep modifications after crisis                                           | No                           |                     | Yes                        |        | 0.025    |          |
|                                                                                       | 0.031                        |                     | -0.17                      |        |          |          |
| <b>Workload</b>                                                                       |                              |                     |                            |        |          |          |
| Degree of arduousness                                                                 | Not arduous                  | Arduous             | Highly arduous             | 0.0043 |          |          |
|                                                                                       | -0.11 <sup>b</sup>           | -0.092 <sup>b</sup> | 0.15 <sup>a</sup>          |        |          |          |
| Member of an agricultural replacement service                                         | Yes                          |                     | No                         |        | 0.059    |          |
|                                                                                       | 0.058                        |                     | -0.0801                    |        |          |          |
| Worker engagement: help for workload and administrative aspects                       | Already implemented          |                     | To implement in the future |        | 0.25     |          |
|                                                                                       | 0.024 <sup>ab</sup>          |                     | 0.13 <sup>a</sup>          |        |          |          |
| <b>Production factors</b>                                                             |                              |                     |                            |        |          |          |
| Milk production evolution for 5 years                                                 | Decrease                     |                     | Constant                   |        | Increase | 0.036    |
|                                                                                       | -0.21                        |                     | -0.13                      |        | 0.052    |          |
| Agricultural area investment since 2009                                               | No                           |                     | Yes                        |        | 0.0002   |          |
|                                                                                       | -0.14                        |                     | 0.14                       |        |          |          |
| Investment (no agricultural area) since 2009                                          | No                           |                     | Yes                        |        | 0.055    |          |
|                                                                                       | -0.19                        |                     | 0.015                      |        |          |          |
| Agricultural area investment in 5 years                                               | No                           |                     | Yes                        |        | 0.073    |          |
|                                                                                       | -0.0909                      |                     | 0.046                      |        |          |          |
| Geographical situation                                                                | Brabant                      | Liège               | Namur                      | Luxem- | Hainaut  | 0.51     |
|                                                                                       | Walloon                      | 0.12                | 0.055                      | bourg  | -0.099   |          |
|                                                                                       | 0.11                         |                     |                            | -0.013 |          |          |
| <b>Age</b>                                                                            |                              |                     |                            |        |          |          |
| Age (years)                                                                           | 0-34                         |                     | 35-44                      |        | 45-54    | 55-64    |
|                                                                                       | -0.086                       |                     | 0.0105                     |        | 0.0049   | 0.0502   |
| <b>Diversification and alternative valorisation</b>                                   |                              |                     |                            |        |          |          |
| Presence of other animal production                                                   | Yes                          |                     | No                         |        | 0.037    |          |
|                                                                                       | -0.093                       |                     | 0.0603                     |        |          |          |
| Dairy processing and direct sales: sector developed if supported                      | Yes                          |                     | No                         |        | <0.001   |          |
|                                                                                       | -0.33                        |                     | 0.11                       |        |          |          |
| Processing and direct sales (except dairy): sector developed if supported             | Yes                          |                     | No                         |        | 0.0096   |          |
|                                                                                       | -0.39                        |                     | 0.013                      |        |          |          |
| HORECA, tourism and teaching activity to develop even if sustained                    | Yes                          |                     | No                         |        | 0.055    |          |
|                                                                                       | -0.18                        |                     | 0.018                      |        |          |          |
| Concern for diversification                                                           | Yes                          |                     | No                         |        | <0.001   |          |
|                                                                                       | -0.23                        |                     | 0.17                       |        |          |          |
| Alternative chain for milk production valorisation                                    | Yes                          |                     | No                         |        | <0.001   |          |
|                                                                                       | -0.49                        |                     | 0.036                      |        |          |          |
| Alternative chain for "other than dairy" activity                                     | Yes                          |                     | No                         |        | 0.0017   |          |
|                                                                                       | -0.56                        |                     | -0.0087                    |        |          |          |
| Increase of "other than dairy" activity without investment                            | Yes                          |                     | No                         |        | 0.012    |          |
|                                                                                       | -0.42                        |                     | -0.013                     |        |          |          |
| No activity to develop even if sustained                                              | Yes                          |                     | No                         |        | <0.001   |          |
|                                                                                       | 0.27                         |                     | -0.10                      |        |          |          |
| Increase of added value in farms: advantage of diversification and transformation     | Yes                          |                     | No                         |        | 0.0047   |          |
|                                                                                       | -0.097                       |                     | 0.11                       |        |          |          |
| Link between producers and consumers: advantage of diversification and transformation | Yes                          |                     | No                         |        | 0.0064   |          |
|                                                                                       | -0.14                        |                     | 0.066                      |        |          |          |
| Conservation of farms in the region: advantage of diversification and transformation  | Yes                          |                     | No                         |        | 0.037    |          |
|                                                                                       | -0.16                        |                     | 0.028                      |        |          |          |

|                                                                                               |                                     |                                       |                                                                              |
|-----------------------------------------------------------------------------------------------|-------------------------------------|---------------------------------------|------------------------------------------------------------------------------|
| Financial, decisional and technical autonomy: advantage of diversification and transformation | Yes<br>-0.27                        | No<br>0.030                           | 0.005                                                                        |
| Consumer loyalty: limit to diversification and transformation                                 | Yes<br>0.17                         | No<br>-0.047                          | 0.028                                                                        |
| Regulatory constraints (hygiene, etc.): limit to diversification and transformation           | Yes<br>-0.080                       | No<br>0.055                           | 0.065                                                                        |
| Size of investments: limit to transformation and diversification                              | Yes<br>-0.14                        | No<br>0.0401                          | 0.030                                                                        |
| No constraints for transformation and diversification                                         | Yes<br>-0.093                       | No<br>0.042                           | 0.052                                                                        |
| No advantage of diversification and transformation                                            | Yes<br>0.27                         | No<br>-0.066                          | 0.0006                                                                       |
| <b>Breed</b>                                                                                  |                                     |                                       |                                                                              |
| Composition of the herd                                                                       | Single breed<br>0.18                | Multi-breed<br>-0.095                 | 0.0005                                                                       |
|                                                                                               | Pure-bred<br>0.0058                 | Dual purpose breed:<br>-0.19          | 0.0023                                                                       |
| <b>Regrouping</b>                                                                             |                                     |                                       |                                                                              |
| Advantage of fiscal and administrative aspects: advantage of grouping                         | Yes<br>-0.16                        | No<br>0.023                           | 0.050                                                                        |
| Development of a joint project: advantage of grouping                                         | Yes<br>-0.15                        | No<br>0.020                           | 0.072                                                                        |
| Better marketing of the products: advantage of grouping                                       | Yes<br>-0.38                        | No<br>0.0063                          | 0.030                                                                        |
| <b>Mechanisation and robotisation</b>                                                         |                                     |                                       |                                                                              |
| Mechanisation, robotisation: help with workload and administrative aspects                    | Into effect<br>-0.031 <sup>ab</sup> | Not interested<br>-0.094 <sup>b</sup> | To activate<br>0.12 <sup>a</sup><br>0.041                                    |
| <b>Reaction to external factors</b>                                                           |                                     |                                       |                                                                              |
| Arduousness of the economic uncertainty of input price                                        | No<br>-0.19                         | Yes<br>0.0403                         | 0.0089                                                                       |
| Will of a dairy factory imposing production limits                                            | Yes<br>-0.23 <sup>c</sup>           | No<br>0.25 <sup>a</sup>               | Not important<br>0.0088 <sup>b</sup><br><0.001                               |
| Evolution of milk production during crises (2009, 2012)                                       | Decrease<br>-0.17 <sup>b</sup>      | No variation<br>-0.092 <sup>b</sup>   | Increase<br>0.21 <sup>a</sup><br>0.0006                                      |
| Ideal size of the dairy factory                                                               | Small<br>-0.52 <sup>c</sup>         | Medium<br>-0.11 <sup>b</sup>          | Large<br>0.42 <sup>a</sup><br>Not important<br>-0.026 <sup>b</sup><br><0.001 |

410

411 **Workload** Workload seems to be less bearable for producers desiring a GBI model  
412 (estimate = 0.15, Table 5;  $R_{\text{workforce constraint}} = 0.22$ ,  $P = 0.002$ ). Producers wishing for a  
413 GBI model were also more likely to be members of an agricultural replacement service  
414 (estimate = 0.058, Table 5) and showed a tendency to be more interested in  
415 employment of workers (estimate = 0.13,  $P_{\text{worker engagement to implement vs. not interested}} = 0.11$ ,  
416 Table 5). The choice of GBI model could be explained by this current workload,  
417 involving the need for an increase of revenue. So, the solution considered could be  
418 higher milk production and the breeding of more cows rather than diversification of

419 activities and self-valorisation activity, the development of which requires a lot of time.  
420 Samson *et al.* (36) confirmed this in the Netherlands by highlighting a nearly significant  
421 effect of labour productivity on the DP increase strategy.

422 **Production factors** The size of agricultural area, the milk delivery quota, the number  
423 of cows and the percentage of corn silage currently observed in the farming system  
424 showed significant and positive correlations with IFFg ( $R = 0.15, 0.36, 0.18$  and  $0.24$ ;  
425  $P = 0.033, <0.001, 0.0099, 0.0002$  respectively). So, dairy producers choose their IFF  
426 partly as a function of their current production factors. This is expected as a higher  
427 number of hectares, cows and litres means a higher capacity of the dairy installation,  
428 of the material and so the possibility of a more preponderant dairy activity. The higher  
429 percentage of corn silage also reflected the possibility to seed corn silage, allowing the  
430 intensification of production as required within a GBI model. Similar relationships  
431 between characteristics of the farm and current or desired models of farming were  
432 observed by others. For Central and Eastern Europe, Verhees *et al.* (15) showed that  
433 land was the most important factor in developing a specific farming strategy. In France,  
434 Hostiou *et al.* (26) observed that intensified farms with higher technology equipment  
435 sometimes employed more workers, and were the farms with significantly higher  
436 agricultural area, percentage of corn silage, number of cows and milk quota. In the  
437 Netherlands, Samson *et al.* (36) showed that production intensity, number of cows,  
438 modernity of technology and availability of land were important factors in DP increase  
439 strategies.

440 In contrast, producers with lower production factors can consider rarely more  
441 enlargement and therefore think differently about the enhancement of their revenue:  
442 better valorisation of quality differentiated milk, other activities on the farm, self

443 valorisation, the LBE model. Samson *et al.* (36) showed that lower stable capacity  
444 varies inversely to a DP increase strategy, which is rather a GBI tendency.

445 The findings of the current study, as confirmed by previous researchers, showed that  
446 producers work within a tightly constrained and regulated environment limiting their  
447 ability to determine the future of their farm according to their personal desires. This  
448 statement was also concluded by Mc Elwee *et al.* (37) and Methorst *et al.* (38). In the  
449 Netherlands, Keizer and Emvalomatis (39) and Groeneveld *et al.* (40) showed that  
450 bigger farms are more likely to increase than other farms.

451 However, based on the quite low values of the correlations obtained between the  
452 agricultural area and the number of cows, we can consider that this situation must be  
453 nuanced and that the IFF chosen also depends on the opinions of the dairy producer,  
454 not taking into account the current situation of his farm. This statement is reinforced by  
455 the fact that the correlation of percentage of meadow with IFFg was not significantly  
456 different to 0 ( $R = -0.097$ ,  $P > 0.1$ ). Also, the impact of the provinces of the Walloon  
457 Region, which present different geographical and soil characteristics, on IFFg were not  
458 significantly different ( $P = 0.51$ , Table 5).

459 Moreover the significant relations between IFFg and milk production evolution for five  
460 years (Table 5;  $R_{\text{quantity of milk variation}} = 0.30$ ,  $P < 0.001$ ), investment for and in five years  
461 (Table 5) support the assumption that the IFF chosen depends greatly on the mentality  
462 of the producers.

463 In their study, Methorst *et al.* (13) proved the heterogeneity of farm developments of  
464 producers facing the same socio-material context, showing the importance of the  
465 mentality of the producers in their decisions. Authors speak about shared values,  
466 norms, ways they see themselves or would like to be seen by producers, views,

467 capacities and their perceptions of opportunities and any room for manoeuvre, skills,  
468 motives, entrepreneurship, goals and strategies (12,13,36,38,41) as factors which  
469 influence farm development. Samson *et al.* (36) discussed experimental economics,  
470 which are economics where psychology and biology, which explain human behaviours,  
471 are added to better explain the development of enterprises. The consideration of more  
472 than just economic aspects permits them to reduce the error of their model for  
473 predicting DP increase strategies (36).

474 **Age** Age of the producer seems not to condition the desired IFF (Table 5). An IFF  
475 could be chosen because of either the new ideas of young producers or the experience  
476 of older producers. If mentality seems to influence IFF choice, it is not linked to age.  
477 The two kinds of IFF could be an answer to both innovation and problems encountered  
478 during a long career. Samson *et al.* (36) also studied age as a reflection of the farmers'  
479 values, goals and strategies, and showed no relationship with DP increase, which is  
480 rather a GBI characteristic. On the contrary, on the basis of data from 11 countries of  
481 the European Union, Weltin *et al.* (42) observed an effect of age on the tendency  
482 towards diversification, which is rather a LBE tendency.

483 **Diversification and alternative valorisation** The results obtained in this study  
484 showed a link between the diversification mentality and the choice of LBE model.  
485 Significant negative estimates or correlations were observed for the following variables  
486 related to diversification: the presence of other animal production (estimate =  $-0.093$ ,  
487 Table 5); the direct selling milk quota ( $R = -0.17$ ,  $P = 0.016$ ); dairy or no dairy  
488 processing and direct sales (estimates =  $-0.33$  and  $-0.39$ , Table 5); the development  
489 of HORECA activities, tourism and teaching (estimate =  $-0.18$ , Table 5); the concern  
490 for diversification (estimate =  $-0.23$ , Table 5); alternative chain for milk and other than  
491 milk production valorisation (estimates =  $-0.49$  and  $-0.56$ , Table 5) and the increase

492 of “other than dairy” activity without investment (estimate =  $-0.42$ , Table 5).  
493 Conversely, producers desiring a GBI model were more likely to choose the item “no  
494 activity to develop if supported”, suggesting the unique principal activity way of thinking  
495 of producers aiming for a GBI model (estimate =  $0.27$ , Table 5). Samson *et al.* (36)  
496 confirmed this tendency and showed that the presence of diversified activities evolved  
497 inversely to the increase of milk production. In this study, we observed potential  
498 explanations to support to this fact. Producers wishing for a LBE model considered  
499 self-valorisation and diversification as solutions to the current situation to enhance  
500 revenue due to the creation of added value (estimate =  $-0.097$ , Table 5). They thought  
501 that diversification and transformation allowed financial, decisional and technical  
502 autonomy (estimate =  $-0.27$ , Table 5) and were confident in consumer loyalty (estimate  
503 =  $-0.047$ , Table 5). They considered relations with consumers as an opportunity and  
504 not a threat, unlike producers desiring a GBI model (estimate =  $0.17$ , Table 5). One  
505 reason GBI model producers gave against self-valorisation and diversification seemed  
506 to be the lack of trust in consumers and therefore the outlets. They frequently saw no  
507 advantage to self-valorisation and diversification (estimate =  $0.27$ , Table 5). The  
508 relation to the consumer was also studied by Verhees *et al.* (15). They observed that  
509 consumer orientation was more often declared as an opportunity by the profiles of  
510 producers considering strategies similar to LBE. The positive impact of diversified  
511 activities on autonomy was also shown by Bergevoet *et al.* (12). They mentioned that  
512 proponents of the “extra source of income” model (closest to the LBE model) were  
513 more able to declare that they can increase the sales-price of their milk. Producers  
514 wishing for a LBE model were also likely to find no constraints to transformation and  
515 diversification (estimate =  $-0.093$ , Table 5). The only limits to diversification and  
516 transformation highlighted by producers wanting a LBE model were regulatory

517 constraints (estimate =  $-0.080$ , Table 5) and the size of investments (estimate =  $-0.14$ ,  
518 Table 5). As a consequence of these considerations, producers wanting a LBE model  
519 felt that they were more able to meet society's expectations regarding local and  
520 artisanal products ( $R = -0.22$ ,  $P = 0.0016$ ) and the desire for a familial structure ( $R =$   
521  $-0.12$ ;  $P = 0.084$ ).

522 **Breed to produce milk** Producers wanting a LBE model are more open to breeding a  
523 dual-purpose herd (estimate =  $-0.19$ , Table 5), which permits them to diversify their  
524 production: milk and meat. Producers wishing for a GBI model target a single, more  
525 specialised breed (estimate =  $0.18$ , Table 5) which could offer more homogeneous  
526 management of the herd. The link between mentality, observed through the choice of  
527 breed(s), and the choice of IFF is once more highlighted.

528 **Regrouping** Producers tending towards the LBE model were more likely to promote  
529 regrouping for its advantages regarding fiscal and administrative aspects, the  
530 development of a joint project and the marketing of the products (estimates =  $-0.16$ ;  $-$   
531  $0.15$ ;  $-0.38$ , Table 5). The importance of mentality for the choice of IFF has been  
532 shown. A mentality of cooperation, as a solution to enhance their quality of life and  
533 revenue, tends to be shared between producers desiring a LBE model.

534 **Mechanisation and robotisation** We observed that the wish of technology of  
535 producers tending towards GBI model can be explained by the fact that they  
536 considered it as help for workload. A "pro-technology" mentality of the producers  
537 tending towards the GBI model was observed (estimate =  $0.12$ , Table 5). It can be  
538 assumed that the solution considered by them is to keep the same activity or increase  
539 it with help from machines. In southern France, Dufour *et al.* (43) observed the  
540 propensity of farmers with workers, close to the GBI model, to prioritise investment in  
541 equipment. Verhees *et al.* (15) observed that better management, including new

542 technologies, was more cited as an objective for producers whose strategy profiles  
543 were more similar to the GBI than LBE models.

544 **Reaction to external factors** Reactions of dairy producers to factors external to their  
545 decision-making power tend to be different as a function of their choice of IFF, showing  
546 once more a different mentality of the producers. Producers wanting a LBE model tend  
547 to show themselves to be more independent from the external economic actors: from  
548 the input producing companies (estimate =  $-0.19$ , Table 5) and from the market and  
549 factories, rejecting contracts which would link them to it ( $R = -0.13$ , Table 6). When  
550 their opinion about dairy factories was surveyed, producers desiring a LBE model  
551 preferred small or medium units with production limits (estimates =  $-0.52$ ;  $-0.11$ ;  $-$   
552  $0.23$ , Table 5), as before, which means regulation of the dairy offerings on the market.  
553 Producers wishing for a GBI model direct themselves to big units of processing without  
554 production limits (estimates =  $0.42$ ;  $0.25$ , Table 5) and so more turned towards world  
555 markets. They recognise the freedom in regarding DP as an asset of quota removal ( $R$   
556 =  $0.23$ , Table 6). The reaction regarding the quantity of production was not similar  
557 during a crisis, producers wanting a LBE model tended to maintain or decrease their  
558 production (estimates =  $-0.17$ ;  $-0.092$ , Table 5), whereas producers desiring a GBI  
559 model tended to increase production (estimate =  $0.21$ , Table 5). The latter wanted to  
560 keep revenues constant with more litres produced when the price decreased, while the  
561 others controlled or decreased production when the gross margin per litre decreased.  
562 This can be due to a deliberate choice to decrease milk production or a decision to  
563 decrease the variable costs causing a decrease in milk production. These results can  
564 express a fear of producers tending toward the LBE model in considering world  
565 markets, contrary to producers tending towards the GBI model who have decided to  
566 work with this kind of market. Verhees *et al.* (15) observed that producers projecting

567 strategies similar to the LBE model consider the market more as a threat than  
568 producers projecting strategies similar to the GBI model. Hansson *et al.* (44) and Weltin  
569 *et al.* (14) explained that this uncertainty and risk perception can explain the choice of  
570 diversification, which is a part of the strategy of the LBE model.

571 Couzy and Dockès (7) demonstrated different profiles of farmers and observed the  
572 entrepreneurship mentality of each one, which highlights similar tendencies to those  
573 presented here. Several profiles showed strong entrepreneurship but which was  
574 expressed differently to here. A category of farmers showed entrepreneurship by their  
575 wish for autonomy of decision in their management; they will keep a working approach  
576 close to the conventional one but with a modernist vision, always adapting to the  
577 market. They want to keep freedom in the classical framework. In 1988, Mooney  
578 described the split personality of producers: they are independent people, making their  
579 own decisions regarding their way of working and their investments but at the same  
580 time are people dependent on different processing actors and banks (45). Another  
581 category of farmers showed entrepreneurship by their wish to develop an original idea,  
582 away from preexisting systems, a project in line with their conviction to be freer from  
583 the existing system [5].

584 Samson *et al.* (36) and Methorst *et al.* (13) reported that decisions of producers cannot  
585 be reduced to only economic aspects: this includes policies and market conditions but  
586 also their way of thinking about them.

587 **Table 6 Correlations (R) between the ideal future farm gradient and quantitative**  
588 **variables (N = 207)**

589 \*producers declaring no calling of replacement services were removed from this analysis

590

591

## 592 **How do environmental aspects factor into IFF decisions?**

593 The environmental aspects related to the desired IFF were studied as awareness of  
594 the environmental impact of breeding has become an important issue of our time.

595 Producers tending toward the GBI model seemed to work with a higher livestock  
596 manure application pressure (R = 0.16, Table 6) and therefore are already more likely  
597 to work in an intensified dairy system, which can have a greater impact on the  
598 environment. Samson *et al.* (36) showed a tendency toward manure production surplus  
599 by producers with increasing DP, which is rather a GBI characteristic.

600 Results of practices that are in accordance with the environment: measurement of the  
601 grass height, forage mixture with leguminous plants, use of a field notebook (estimates

| Quantitative variable                                                                                     | R     | P      |
|-----------------------------------------------------------------------------------------------------------|-------|--------|
| <b>Reaction to external factors</b>                                                                       |       |        |
| Contract means dairy production more integrated to dairy factories: level of agreement                    | -0.13 | 0.076  |
| Quota removal means more flexibility concerning production: level of agreement                            | 0.23  | 0.0014 |
| <b>Considerations of the environmental aspects</b>                                                        |       |        |
| Degree of the constraint: livestock manure application                                                    | 0.16  | 0.022  |
| Facility to answer to society's expectations: environmentally friendly agricultural practices             | -0.15 | 0.027  |
| Agricultural activity is important for rurality of villages: level of agreement                           | -0.23 | 0.0011 |
| Agricultural activity is important for conservation of permanent grasslands: level of agreement           | -0.27 | <0.001 |
| Agricultural activity is important for biodiversity: level of agreement                                   | -0.18 | 0.0101 |
| Agricultural activity is important for planting and maintenance of hedges: level of agreement             | -0.28 | <0.001 |
| Importance of answering society's expectations for the revenue of the dairy producers: level of agreement | -0.11 | 0.11   |
| Ease of answering society's expectations: landscape and territory maintenance: level of agreement         | -0.19 | 0.0065 |
| <b>Needs: formation method</b>                                                                            |       |        |
| *Frequency of calling replacement services for meeting and formations (N = 104)                           | 0.21  | 0.066  |

602 = -0.27; -0.11; -0.074, Table 7) showed a stronger interest from producers wanting a  
603 LBE model.

604 **Table 7 Value and level of significance for the difference in the ideal future farm**  
605 **gradient as a function of modalities of categorical variables: Environmental**  
606 **aspects (N = 207)**

607 Means with different letters are significantly different.

| Categorical variable                                                               | Modality and estimate |              | P      |
|------------------------------------------------------------------------------------|-----------------------|--------------|--------|
| <b>Considerations of environmental aspects</b>                                     |                       |              |        |
| Measurement of the grass height: optimisation practice                             | Yes<br>-0.27          | No<br>0.0083 | 0.059  |
| Forage mixture with leguminous plants: optimisation practice                       | Yes<br>-0.11          | No<br>0.083  | 0.0088 |
| Field notebook: optimisation practice                                              | Yes<br>-0.074         | No<br>0.061  | 0.065  |
| <b>Climatic hazard</b>                                                             |                       |              |        |
| Increase of concentrate distribution: strategy to confront climatic hazards        | Yes<br>0.22           | No<br>-0.036 | 0.036  |
| Decrease of the herd: strategy to confront climatic hazards                        | Yes<br>-0.25          | No<br>0.014  | 0.037  |
| Food self-sufficiency: cause for maintaining constant or decreased milk production | Yes<br>-0.17          | No<br>0.0073 | 0.14   |

608 Besides these, all the significant negative correlations between IFFg and the levels of  
609 agreement with an agricultural area are important for the rurality of villages ( $R = -0.23$ ,  
610 Table 6), for conservation of permanent grasslands ( $R = -0.27$ , Table 6), for  
611 biodiversity ( $R = -0.18$ , Table 6) and for hedges ( $R = -0.28$ , Table 6) showed the  
612 importance of the environment in the dairy activity of producers wanting a LBE model.  
613 It can be assumed that both LBE producers and GBI producers have concerns for the  
614 environment but in different ways. These results showed that LBE producers are more  
615 willing to employ the benefits of ecosystem services, which is observable in this  
616 database. Moreover, they found it easy to realise environmentally friendly agricultural  
617 practices, as asked for by society ( $R = -0.15$ , Table 6) and which are important to  
618 answer to society's expectations to guarantee their revenue ( $R = -0.11$ , Table 6).

619 Bergevoet *et al.* (12) had a considerably more consistent opinion. The “extra-source of  
620 income” profile producers (showing similarities with the LBE model) were more likely  
621 to declare that in their decision-making they take the environment into consideration,  
622 even if it lowers profit. The “large and modern farm” profile producers do not mention  
623 their will to adopt these initiatives.

624 **Climatic hazard** Facing feed shortages due to unfavourable climatic conditions,  
625 producers tending toward GBI and LBE seem not to have the same way of thinking;  
626 GBI producers intend to buy high nutritional feed to balance shortages (estimate =  
627 0.22, Table 7) and LBE producers are going to decrease the number of cows (estimate  
628 = -0.25, Table 7) and ensure their feed autonomy (estimate = -0.17, Table 7).

## 629 **How do farmers' ideal future farm compare to their current** 630 **farming systems?**

631 The current situation of dairy producers was compared to their preferred IFF (Table 1).  
632 Except for the type of workforce, quite high percentages of “unhappy” producers were  
633 observed for the farm characteristics, between 37 to 50%. This suggested that not all  
634 producers work as they would like to. The same comparison was not found in the  
635 literature, to our knowledge.

636 As dairy producers do not work in a way that they consider to be ideal, it is interesting  
637 to study the gaps to fill in order to reach their ideal system and so, amongst others,  
638 their needs. The study of the requirements to reach the IFF, including ways to meet  
639 these needs and the area of the needs, can inform the stakeholders of the dairy sector  
640 about what must be developed to evolve into IFF.

## 641 **Which paths and themes of training do dairy producers want** 642 **in order to reach their desired ideal future farm?**

643 **Paths to formation** As way to improve their skills, producers wanting GBI tended to  
644 favour consultancy (estimate = 0.17, Table 8) and commercial companies (estimate =  
645 0.16, Table 8) and not days of study on other farms (estimate = 0.082, Table 8),  
646 meanwhile producers wanting LBE supported this latter possibility (estimate = -0.088,

647 Table 8), a network of pilot farms (estimate = -0.13, Table 8) and the associate, non-  
 648 market sector (estimate = -0.21, Table 8). Moreover, for help in technical choices,  
 649 producers desiring LBE chose formation and study days (estimate = -0.15, Table 8)  
 650 and producers' technical groups to implement in the future (estimate = -0.20, Table 8).  
 651 The choices presented confirm the will for a non-market way to learn for producers  
 652 wanting LBE, contrary to producers wishing for GBI.

653 As an information source, the agricultural press was commonly cited (N = 161, *i.e.* 78%  
 654 of respondents), but producers desiring LBE tend to not want to inform themselves in  
 655 this conventional way (estimate = -0.14, Table 8).

656 Producers wanting a GBI model tend to need more help to free them from their work  
 657 in order to follow a formation (R = 0.21, Table 6)

658 **Table 8** Value and level of significance of the difference in the ideal future farm gradient  
 659 as a function of modalities of categorical variables: formations (N = 207)

660 Means with different letters are significantly different.

| Categorical variable                                   | Modality and estimate                     |                                                  |                                      | P      |
|--------------------------------------------------------|-------------------------------------------|--------------------------------------------------|--------------------------------------|--------|
| <b>Needs: ways to learn formations</b>                 |                                           |                                                  |                                      |        |
| **Consultancy company: SFI* place                      | Yes<br>0.17                               | No:<br>-0.087                                    |                                      | 0.0017 |
| **Study days on farm: SFI place                        | Yes<br>-0.088                             | No<br>0.082                                      |                                      | 0.026  |
| **Network of pilot farms: SFI place                    | Yes<br>-0.13                              | No<br>0.056                                      |                                      | 0.025  |
| **Associate, non-market sector SFI place development   | Yes<br>-0.21                              | No<br>0.062                                      |                                      | 0.0023 |
| **Commercial company: SFI place                        | Yes<br>0.16                               | No<br>-0.058                                     |                                      | 0.014  |
| ***Agricultural press: information source              | Yes<br>0.025                              | No<br>-0.14                                      |                                      | 0.068  |
| Formation and study day: help for technical choices    | Already implemented<br>0.037 <sup>a</sup> | To implement in the future<br>-0.15 <sup>b</sup> | Not interested<br>0.035 <sup>a</sup> | 0.082  |
| Producers technical groups: help for technical choices | Already implemented<br>0.020 <sup>a</sup> | To implement in the future<br>-0.20 <sup>b</sup> | Not interested<br>0.11 <sup>a</sup>  | 0.0046 |
| <b>Needs: domain formation</b>                         |                                           |                                                  |                                      |        |
| **Finance and management: requested formation          | Yes<br>0.066                              | No<br>-0.24                                      |                                      | 0.0007 |

|                                                       |                                           |                                                  |                                              |
|-------------------------------------------------------|-------------------------------------------|--------------------------------------------------|----------------------------------------------|
| **Processing and diversification: requested formation | Yes<br>-0.18                              | No<br>0.089                                      | 0.0008                                       |
| **Plant selection: requested formation                | Yes<br>0.083                              | No<br>-0.053                                     | 0.087                                        |
| **Animal selection: requested formation               | Yes<br>0.080                              | No<br>-0.082                                     | 0.034                                        |
| **Animal feeding: requested formation                 | Yes<br>0.03                               | No<br>-0.14                                      | 0.073                                        |
| **Administrative: requested formation                 | Yes<br>0.064                              | No<br>-0.11                                      | 0.026                                        |
| **Legal framework: requested formation                | Yes<br>0.14                               | No<br>-0.083                                     | 0.005                                        |
| Request for advice: help for financial aspects        | Already implemented<br>0.014 <sup>a</sup> | To implement in the future<br>-0.15 <sup>b</sup> | Not interested<br>0.049 <sup>a</sup><br>0.19 |

661 \*SFI = study, formation and information

662 \*\*producers declaring no will of formation were removed from this analysis

663 \*\*\* producers declaring no agricultural press as an information source were removed from this analysis

664

665 **Formation domains** The formation domains reflected the direction chosen by  
666 producers looking for LBE and the ways to reach it. They tend to want skills related to  
667 processing and diversification (estimate = -0.18, Table 8) and were likely to reject  
668 finance, management (estimate = -0.24, Table 8), administrative (estimate = -0.11,  
669 Table 8) and legal framework skills (estimate = -0.083, Table 8). For financial aspects  
670 producers wanting LBE tend to favour requests for advice from experts rather than  
671 self-formation (estimate = -0.15,  $P_{\text{to implement vs. not interested}} = 0.12$ , Table 8). They do not  
672 choose animal feeding (estimate = -0.14, Table 8) and selection formations (estimates  
673 = -0.053; -0.082, Table 8). This could suggest the will of the producers not to change  
674 their way of management and the level of quality of their herd but the method of  
675 valorisation of their production.

676 In contrast, producers desiring GBI tend to want to continue to enhance their vegetal  
677 and animal production (estimates = 0.083; 0.08, Table 8), to become more efficient  
678 and enhance their revenue. Moreover they are more interested in legal aspects  
679 (estimate = 0.14, Table 8). Expansion and complexification of the GBI model of dairy

680 farms wished for by these producers could be an explanation. Bergevoet *et al.* (12)  
681 also observed a will to be well informed about the legislation for the “modern and large  
682 farm” profile. This is not noted in their profile, which is close to the LBE model.

683 Two kinds of formation were identified and preferred by producers wanting LBE or GBI  
684 models. Bergevoet *et al.* (12) observed the will to innovate for the two profiles closest  
685 to LBE and GBI profiles of this study. Verhees *et al.* (15) observed that formation was  
686 the most important resource for dairy producers. The present research differentiated  
687 the formation desired as a function of IFF. Dufour *et al.* (43) defined, through a survey  
688 of 15 dairy farmers, three conceptions of the work: difficult, organisational and  
689 passionate. The passionate approach was accompanied by the desire for new  
690 knowledge which was, as observed here, either to learn about genetic selection or  
691 about processing and marketing of products.

692

## 693 **Conclusions**

694 In conclusion, the GBI tendency is two times more represented than the LBE tendency.  
695 Many reasons explain this choice of ideal farm. Past crises seem to cause farmers to  
696 desire the LBE model. A high workload seems to orientate respondents to the GBI  
697 model. The wish for the IFF is influenced by the current framework but is also a  
698 question of mentality. Production factors reached, breeds chosen for the herd, ways to  
699 react to factors external to the farm, consideration of diversification and alternative  
700 valorisation, regrouping and mechanisation and robotisation describe the producers'  
701 mentality and showed different relations with the IFF chosen. Moreover LBE and GBI  
702 producers may both have concern for the environment, but the approach to act for the  
703 environment by LBE producers, through concern for ecosystem services, is clearly  
704 highlighted in this study. These producers found it important to answer to society's  
705 expectations. Finally, as the current situation of farming is quite different to the ideal  
706 one, the learning needs were studied and two types of customer appeared in relation  
707 to their formation. We conclude that two kinds of dairy producers seem to appear, for  
708 different reasons, with different relations to the environment and asking for different  
709 formations.

## 710 **Acknowledgments**

711 I want to thank the organising committee of "Carrefour des Productions animales" for  
712 the supply of the data.

713

## 714 References

- 715 1. Mazoyer M, Roudart L. Histoire des agricultures du monde. Du néolithique à la crise  
716 contemporaine. Editions du Seuil; 1997. 1–705 p.
- 717 2. Lefèvre D. Des racines et des gènes. Une histoire mondiale de l'agriculture. Volume 1. Rue de  
718 l'Echiquier; 2018. 1–567 p.
- 719 3. European Economic Community. Treaty of Rome. 1957.
- 720 4. STATBEL. Exploitations agricoles et horticoles - plus de chiffres [Internet]. 2019. Available from:  
721 <https://statbel.fgov.be/fr/themes/agriculture-peche/exploitations-agricoles-et-horticoles/plus>
- 722 5. Havet A, Cournut S, Correa P, Madelrieux S, Pocard R, Corniaux C, et al. Tandem changes in  
723 livestock farming and feed systems since 1960: a study of six dairy-producing regions. Fourrages  
724 [Internet]. 2015;222:115–24. Available from:  
725 [http://apps.webofknowledge.com/full\\_record.do?product=UA&search\\_mode=GeneralSearch&q](http://apps.webofknowledge.com/full_record.do?product=UA&search_mode=GeneralSearch&qid=3&SID=R2ZtQywoePOzfzM5uQW&page=16&doc=153&cacheurlFromRightClick=no)  
726 [id=3&SID=R2ZtQywoePOzfzM5uQW&page=16&doc=153&cacheurlFromRightClick=no](http://apps.webofknowledge.com/full_record.do?product=UA&search_mode=GeneralSearch&qid=3&SID=R2ZtQywoePOzfzM5uQW&page=16&doc=153&cacheurlFromRightClick=no)
- 727 6. Lebacq T. La durabilité des exploitations laitières en Wallonie - Analyse de la diversité et voies  
728 de transition [Internet]. UCLouvain, Louvain-la-Neuve, Belgium; 2015. Available from:  
729 [http://www.philagri.net/wp-content/uploads/2015/03/TL\\_redaction\\_these\\_20150302.pdf](http://www.philagri.net/wp-content/uploads/2015/03/TL_redaction_these_20150302.pdf)
- 730 7. Couzy C, Dockes A-C. Are farmers businesspeople? Highlighting transformations in the  
731 profession of farmers in France. Int J Entrep Small Bus [Internet]. 2008;6(3):407–20. Available  
732 from:  
733 [http://www.inderscience.com/search/index.php?action=record&rec\\_id=19135&prevQuery=&ps](http://www.inderscience.com/search/index.php?action=record&rec_id=19135&prevQuery=&ps=10&m=or)  
734 [=10&m=or](http://www.inderscience.com/search/index.php?action=record&rec_id=19135&prevQuery=&ps=10&m=or)
- 735 8. SPW Environnement Agriculture Ressources naturelles, Département de l'Etude du Milieu  
736 naturel, Direction de l'Analyse Économique et agricole. Agriculture Evolution de l'économie  
737 agricole et horticole de la Wallonie 2013-2014. 2013.
- 738 9. Cournut S, Rapey H, Nozières MO, Pocard-Chapuis, R., Corniaux C, Choisis JP, et al.  
739 Dynamics of livestock farming in extensive livestock farming territories : what processes are  
740 going on ? In: 10th European IFSA Symposium. Aarhus, Denmark; p. Unpaginated Ref. 26.

- 741 10. FAO. Livestock's Long Shadow. Environ issues options. 2006;1.
- 742 11. Napoléone M, Boutonnet JP, Corniaux C, Alavoine-Mornas F, Barrिताux V, Carvalho S, et al.  
743 Between local and global : which reconfiguration within Dairy Basins ? A comparative analysis  
744 from North & South case-studies. In: 10th European Social Science History Conference. Vienna,  
745 Austria; 2014. p. 1–12.
- 746 12. Bergevoet RHM, Ondersteijn CJM, Saatkamp HW, Van Woerkum CMJ, Huirne RBM.  
747 Entrepreneurial behaviour of dutch dairy farmers under a milk quota system: Goals, objectives  
748 and attitudes. Agric Syst. 2004;80(1):1–21.
- 749 13. Methorst RG (Ron.), Roep D (Dirk), Verhees FJHM (Frans.), Verstegen JAAM (Jos. Differences  
750 in farmers' perception of opportunities for farm development. NJAS - Wageningen J Life Sci  
751 [Internet]. 2017;81:9–18. Available from: <http://dx.doi.org/10.1016/j.njas.2017.02.001>
- 752 14. Weltin M, Zasada I, Franke C, Piorr A, Raggi M, Viaggi D. Analysing behavioural differences of  
753 farm households: An example of income diversification strategies based on European farm  
754 survey data. Land use policy [Internet]. 2017;62:172–84. Available from:  
755 <http://dx.doi.org/10.1016/j.landusepol.2016.11.041>
- 756 15. Verhees F, Malak-Rawlikowska A, Stalgiene A, Kuipers A, Klopčič M. Dairy farmers' business  
757 strategies in Central and Eastern Europe based on evidence from Lithuania, Poland and  
758 Slovenia. Ital J Anim Sci [Internet]. 2018;17(3):755–66. Available from:  
759 <https://doi.org/10.1080/1828051X.2017.1422154>
- 760 16. Salou T, van der Werf HMG, Levert F, Forslund A, Hercule J, Le Mouël C. Could EU dairy quota  
761 removal favour some dairy production systems over others? The case of French dairy production  
762 systems. Agric Syst [Internet]. 2017;153:1–10. Available from:  
763 <http://dx.doi.org/10.1016/j.agsy.2017.01.004>
- 764 17. Palm R. L'analyse à correspondances multiples: principes et application. Notes Stat  
765 d'informatique. 2007;
- 766 18. Benzécri JP. Sur le calcul des taux d'inertie dans l'analyse d'un questionnaire. Cah l'analyse des  
767 données. 1979;4:377–8.

- 768 19. Everitt BS, Landau S, Leese M, Stahl D. Cluster Analysis, 5th Edition. Shewhart WA, Wilks SS,  
769 editors. Wiley; 2011. 1–330 p.
- 770 20. Service Public de Wallonie. La Carte des Sols de Wallonie [Internet]. Available from:  
771 <http://geoportail.wallonie.be/catalogue/ce3b6602-1c52-483f-9133-770009cdd02b.html>
- 772 21. SPW Environnement Agriculture Ressources naturelles, Agricole, Département de l'Etude du  
773 Milieu naturel, Direction de l'Analyse Économique et agricole. Evolution de l'économie agricole  
774 et horticole de la Wallonie 2017. 2017.
- 775 22. De Haan C. Smallholder dairy production. In: Agriculture Investment Sourcebook. 2011. p. 169–  
776 73.
- 777 23. USDA/ERS. The U. S. Dairy Industry, A Vital Contributor To Economic Development. 2014.
- 778 24. González JJ, Gómez Benito C. Profession and identity. The case of family farming in Spain.  
779 *Sociol Ruralis*. 2001;41(3):343–57.
- 780 25. Mooney PH. My own boss? Class, Rationality, and the Family Farm. Boulder. 1988.
- 781 26. Hostiou N, Chauvat S, Cournut S. Faire face à des questions de travail : les leviers mobilisés par  
782 des éleveurs laitiers. In: INRA, editor. L'agriculture en famille : travailler, réinventer, transmettre  
783 [Internet]. Paris France; 2015. p. 125–43. Available from:  
784 [http://open.edpsciences.net/index.php?option=com\\_content&view=article&id=290&Itemid=311](http://open.edpsciences.net/index.php?option=com_content&view=article&id=290&Itemid=311#008)  
785 #c008
- 786 27. Cournut S, Servièrre G, Hostiou N, Chauvat S, Dedieu B. L'organisation du travail en exploitations  
787 familiales d'élevage. Enseignements d'une analyse comparée conduite en France, en Amérique  
788 latine et au Vietnam. *Cah Agric*. 2010;19:338–47.
- 789 28. Garcia-Martinez A, Olaizola A, Bernués A. Trajectories of evolution and drivers of change in  
790 European mountain cattle farming systems. *Animal*. 2009;3:152–65.
- 791 29. Mc Elwee G, Robson A. Diversifying the farm: opportunities and barriers. *Finnish J Rural Res*  
792 *Policy*. 2005;4:84–96.
- 793 30. Dockes A-C, Couzy C, Daridan D, Gallot S, Magdelaine P, Pilorgé E, et al. Transformation de  
794 l'agriculture et des métiers des agriculteurs: quelles conséquences pour les organismes de

- 795 Développement ? In: Journées INRA-SFER de recherches en sciences sociales. 2007. p. 18.
- 796 31. Lémery B. Les agriculteurs dans la fabrique d'une nouvelle agriculture. *Sociol Trav.*  
797 2003;45(1):9–25.
- 798 32. Constance DH, Choi JY, Lyke-Ho-Gland H. Conventionalization, bifurcation, and quality of life:  
799 certified and non-certified organic farmers in Texas. *South Rural Sociol* [Internet].  
800 2008;23(1):208–34. Available from: [http://ag.auburn.edu/auxiliary/srsa/pages/Articles/SRS 2008](http://ag.auburn.edu/auxiliary/srsa/pages/Articles/SRS%2008%2023%201%20208-234.pdf)  
801 23 1 208-234.pdf
- 802 33. Stassart PM, Jamar D. Agriculture biologique et verrouillage des systèmes de connaissances  
803 Conventionalisation des filières agroalimentaire bio1. *Innov Agron.* 2009;2009(4):313–28.
- 804 34. Rosin C, Campbell H. Beyond bifurcation: Examining the conventions of organic agriculture in  
805 New Zealand. *J Rural Stud* [Internet]. 2009;25(1):35–47. Available from:  
806 <http://dx.doi.org/10.1016/j.jrurstud.2008.05.002>
- 807 35. Dalcq A-C, Beckers Y, Wyzen B, Reding E, Delhez P, Soyeurt H. Behavior patterns to the  
808 intensification vary differently within dairy producers. In: *Proceedings of the 69th EAAP meeting.*  
809 *Dubrovnik; 2018.*
- 810 36. Samson GS, Gardebroek C, Jongeneel RA. Explaining production expansion decisions of Dutch  
811 dairy farmers. *NJAS - Wageningen J Life Sci* [Internet]. 2016;76:87–98. Available from:  
812 <http://dx.doi.org/10.1016/j.njas.2015.11.007>
- 813 37. Mc Elwee G. The enterprising farmer: a review of entrepreneurship in agriculture. *J R Agric Soc*  
814 *Engl* [Internet]. 2006;January:1–9. Available from:  
815 [https://www.academia.edu/2832784/The\\_enterprising\\_farmer\\_a\\_review\\_of\\_entrepreneurship\\_i](https://www.academia.edu/2832784/The_enterprising_farmer_a_review_of_entrepreneurship_in_agriculture)  
816 [n\\_agriculture](https://www.academia.edu/2832784/The_enterprising_farmer_a_review_of_entrepreneurship_in_agriculture)
- 817 38. Methorst R, Roep D, Verstegen J, Wiskerke JSC. Three-fold embedding: Farm development in  
818 relation to its socio-material context. *Sustainability.* 2017;9(10):1–19.
- 819 39. Keizer TH, Emvalomatis G. Differences in TFP growth among groups of dairy farms in the  
820 Netherlands. *NJAS - Wageningen J Life Sci* [Internet]. 2014;70:33–8. Available from:  
821 <http://dx.doi.org/10.1016/j.njas.2014.03.001>

- 822 40. Groeneveld A, Peerlings J, Bakker M, Heijman W. The effect of milk quota abolishment on farm  
823 intensity: Shifts and stability. *NJAS - Wageningen J Life Sci* [Internet]. 2016;77:25–37. Available  
824 from: <http://dx.doi.org/10.1016/j.njas.2016.03.003>
- 825 41. Willock J, Deary IJ, Edwards-Jones G, Gibson GJ, McGregor MJ, Sutherland A, et al. The Role  
826 of Attitudes and Objectives in Farmer Decision Making: Business and Environmentally-Oriented  
827 Behaviour in Scotland. *J Agric Econ* [Internet]. 1999;50(2):286–303. Available from:  
828 <http://doi.wiley.com/10.1111/j.1477-9552.1999.tb00814.x>
- 829 42. Zasada I, Piorr A. The role of local framework conditions for the adoption of rural development  
830 policy: An example of diversification, tourism development and village renewal in Brandenburg,  
831 Germany. *Ecol Indic* [Internet]. 2015;59:82–93. Available from:  
832 <http://dx.doi.org/10.1016/j.ecolind.2015.02.002>
- 833 43. Dufour A, Hostiou N, Cournut S, Dedieu B. Work organization on the dairy farm : visions of labour  
834 , working units and type of management varied. In: *Rencontre Recherche Ruminants*. Paris; p.  
835 385–8.
- 836 44. Hansson H, Richard F, Olofsson C. Understanding the diversification and specialization of farm  
837 businesses. *Agric Food Sci* [Internet]. 2010;19:269–83. Available from:  
838 <https://journal.fi/afs/article/view/5689>
- 839 45. Müller B. My own boss? Strategies of resistance and accommodation of rural producers to  
840 neoliberal governance. *Anthropologica* [Internet]. 2010;52(2):233–6. Available from:  
841 <http://ezproxy.library.uvic.ca/login?url=http://search.ebscohost.com/login.aspx?direct=true&db=psyh&AN=2010-25464-002&site=ehost-live&scope=site%5Cnbnmuller@msh-paris.fr>  
842  
843

Dear Academic Editor, dear Reviewers,

First, I would like to thank you for the time spent to improve the understanding of this manuscript. This letter is organized in two parts. The first part deals with the main issue of the review (i.e., the method mobilized, which corresponds to the point raised by the academic editor and one remark of the reviewer). The second part concerns the specific answers to the specific remarks formulated by the reviewers.

Sincerely,

Anne-Catherine Dalcq

## 1/ Methodology

Please read carefully the propositions of reviewer #2 especially about the recommendations you did not take into account in your revision. I am afraid the reviewer is right about the interest of LCA vs MCA, as we expect a characterization of different profiles of dairy farmers.

But my proposition is that instead of LCA, you use HCPC (Hierarchical Clustering on Principal Components) which is a natural and standard extension of MCA (see Arguelles et al. 2014, Kassambara 2017 or the following technical report [http://factominer.free.fr/more/HCPC\\_husson\\_josse.pdf](http://factominer.free.fr/more/HCPC_husson_josse.pdf)).

*H. Soyeurt :*

Dear Editor,

Dear Reviewers,

Instead of my PhD student, Miss Anne-Catherine Dalcq, I would like to answer to the question related to the methodology used in this study. I am Professor H el ene Soyeurt and I teach courses related to Data Mining and Machine Learning at Gembloux Agro-Bio Tech (University of Li ege). Therefore, I have an experience in the use of multivariate analysis. It is why I would like to answer by myself to the question related to the method used in this article.

Before starting an explanation, I would like to precise that we have not really understood the comments of the reviewer about Latent Class Analysis (LCA) because the objective was not to create groups of farmers. Indeed, and this is the innovative aspect of this paper, a gradient between two quite different models of farms was studied. The gradient is really important because it appears to us simplistic to classify farmers in only 2 groups, working with a gradient allowed us to nuance the position of the dairy producers and to analyze more precisely the link between this position and other characteristics. The use of the gradient allows studying the trend of a farmer. It is why in this paper, we always mention "tend towards" to make a reference to the position on the gradient and not a binary choice of a model.

As we did not want to create farmer's clusters, LCA was not appropriate as well as HCPC. However, as asked by the second reviewer to prove the robustness of our approach, we have decided to show you the similarities and the extended work that it is possible to do using Multiple Correspondence Analysis (MCA) and LCA. Indeed, it is also possible to use LCA to create a gradient instead of using the clusters.

So, I would like to remind the methodology that we have proposed in this study (see the figure below, Fig 1)). Again, MCA was used to observe the relationships between the seven studied variables. Based

on the interpretation of MCA dimensions, we have observed that the second dimension represented the positioning between the two models for a dairy farm. Therefore, the score for this dimension for a specific producer allows to know its perception of ideal future farm between the two extreme models. This gradient allows avoiding to limit the farm typology to 2 clusters. This is interesting because many farmers combined some approaches specific to one model of farms (no more intensification but extensification, local-based market) or another one (global-based market, continuously improvement of the productivity thanks to, notably, intensification, ...). Therefore, wishing to split the dairy farmers into 2 groups is too limitative. Some farmers remain between these two models (Fig 2), some farmers are more convinced than others by a model. Farmers showing higher scores are really convinced by GBI model, farmers showing lower but positive scores choose GBI model but are not 100% in this way of farm development. Negatives scores express the position of farms in favor of LBE model, the lowest scores reflected pronounced adhesion to this model. It is why the gradient as proposed in this paper was useful and seem to us the most interesting tool to represent dairy producers.

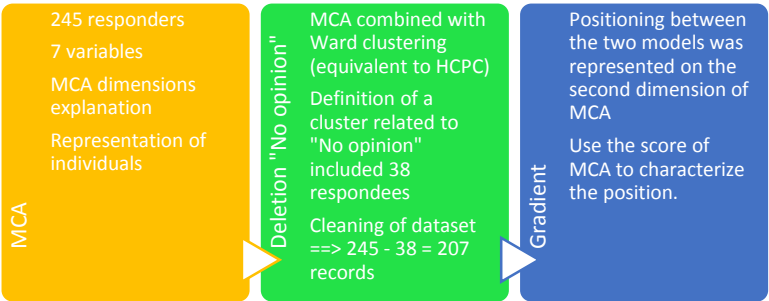

Figure 1 Methodology

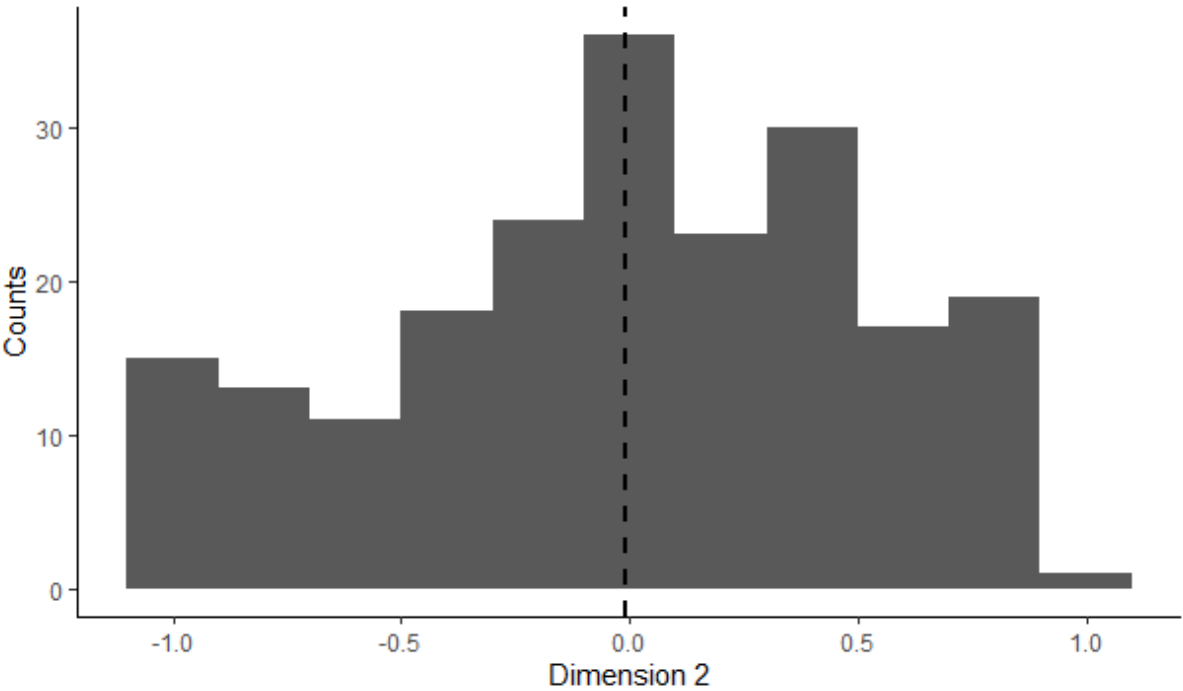

Figure 2 Distribution of the producers (the "with an opinion" ones) along the second dimension of the MCA

Similarly, we have done this job using LCA methodology as requested by the reviewer#2. LCA allows defining clusters from the dataset. In this case and to be in line with the study objective, we have decided to create 3 clusters. Moreover, based on the AIC and BIC values, it was also the best model (Fig 3). LCA allows us to create those 3 clusters. After the interpretation of defined clusters, it appeared that we have a cluster representing “No opinion” responders, one cluster representing “global-based intensive” (**GBI**) farmers and one cluster representing “local-based extensive” (**LBE**) farmers (Fig 4). Therefore, those clusters were similar to the ones obtained by combining MCA and Ward clustering (=HCPC method) as done to clean the dataset (i.e., extract responders with “no opinion” behavior). Again, we did not want to use those clusters to make our analysis. But, using this methodology, it is possible to obtain a probability to belong to a specific cluster. Therefore, we have decided to compare the gradient as defined in the current study to the probability to belong to the LBE or GBI clusters defined using the LCA method.

So, now, it is time to present you the results. I will not present you the results about MCA as those results are reported in the article. In this paragraph, we will focus on the LCA results. As we used categorical variables which are not ordinal, we have decided to use the polytomous latent class analysis. The variables used, called manifest variables, were the same than the one used for MCA. The modalities for each variable were recoded from 1 to 3:

- Intensification: 1. Intensive, 2. Extensive, 3. No opinion
- Number of activities: 1. Specialised, 2. Diversified, 3. No opinion
- Technology: 1. Strongly based on new technologies, 2. Weakly based on new technologies, 3. No opinion
- Workforce: 1. Familial workforce, 2. Employed workforce, 3. No opinion
- Kind of management: 1. Group of farmers management, 2. Independent farmer management, 3. No opinion
- Market: 1. Global market, 2. Local market, 3. No opinion
- Milk quality: 1. Standard quality milk, 2. Differentiated quality milk, 3. No opinion

As this clustering is very sensitive to the prior values used to start the iteration, 10 repetitions were used to provide you the final results for all models. All calculations were done with R software and more specifically the package poLCA. First, we have run different LCA models using a different number of classes (clusters). We have tested models from 1 to 10 classes and then we have estimated the AIC and BIC criteria to observe which model allowed the best fitting. The results of AIC and BIC for all models are presented in the figure below (Fig 3). From this figure, we can conclude that the model allowing the creation of 3 classes is a good compromise between BIC and AIC (i.e., the lowest BIC and AIC values).

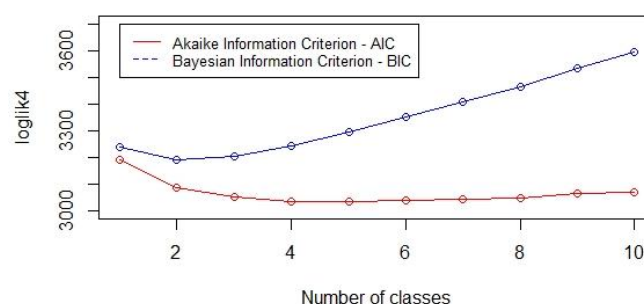

Figure 3 AIC & BIC criteria values

The figure below shows you the clusters defining by the model allowing a discrimination of the data into 3 clusters (Fig 4). This figure represents the probability to have a specific modality for each cluster. So, based on those results, we can conclude that the first clustering (class 1) is related to GBI dairy producers, the second cluster (class 2) is related to LBE dairy producers and the last cluster (class 3) is related to the dairy producers with “no opinion”.

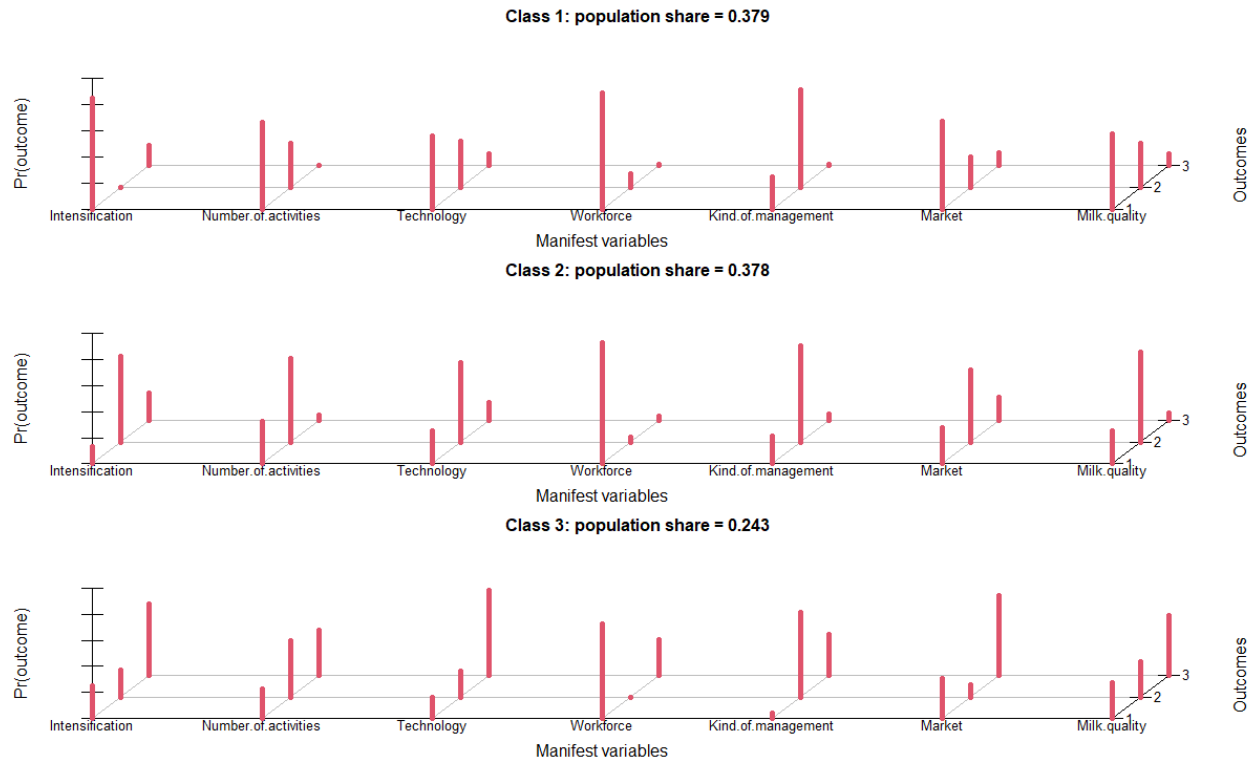

Figure 4 Description of the three clusters obtained by LCA method

Therefore, in order to clean the dataset (i.e., delete records from farmers having many “no opinion” views), we can use the clustering 3. This process is similar to the MCA + Ward clustering (HCPC) proposed in the manuscript. Again, we did not want to use clusters but we want to use a gradient. For MCA, this gradient was the second MCA dimension. In the context of LCA, this gradient can be derived from the probability to belong to class 1 (“GBI producer”) or class 2 (“LBE producer”). So, to show the robustness of the MCA approach used, we calculated the correlation between those probabilities and the score of the second MCA dimension (called gradient in the manuscript). The correlation between the probability to belong to class 1 and the gradient was equal to 0.83. The correlation between the probability to belong to class 2 and the intensification gradient was equal to -0.87. The correlation between the 2 probabilities was equal to -0.97.

From all of those results, you can see that the relationship is strong between MCA and LCA using an innovative approach focusing on the score/probability of an individual and not directly to a cluster. Using only the second dimension of MCA, we can reflect both clusters (class 1 and class 2) simultaneously. Indeed, the second dimension is a gradient “GBI-LBE” and included both. This is really interesting to observe the relationships between this gradient and other quantitative or qualitative variables as now the studied trait is quantitative. It allows to see if a modality of a categorical variable is the choice of really convinced GBI dairy producers or dairy producers only sticking out of the GBI model.

I hope that this demonstration illustrates well the relevancy of the approach proposed in our paper. A sentence will be added in the materials and methods section to explain why LCA was not used. Moreover, some articles exist also in the literature to prove the mathematical relationships between MCA and LCA (e.g., Lautsch and Plichta, Psychology Science 2003:298-323 as well as Van der Heijden, et al., Sociological methodology 1999).

The fact that the two dimensions explained almost 95% of the variability and that all the modalities representing an opinion positioning themselves along the second dimension support us to take the second dimension as gradient, after deletion of the No-opinion producers which were discriminated by the first dimension.

Finally, I would like to acknowledge you for the great job done in the review of this paper. The manuscript was improved a lot.

Sincerely,

Prof H  l  ne Soyeurt

PS : The answers to all other comments were done by Anne-Catherine Dalcq.

## 2/ Others comments

**Reviewer #2: In this revision, the authors have significantly improved the English language translation and clarified their research questions, but they have failed to address the shared concerns of reviewers regarding methods and clarity of writing. They have not adequately addressed the substance of the comments from reviewers.**

**Regarding methods, the reviewers still do not offer a compelling and clear justification for why MCA is appropriate for their goals and they do not offer the latent class analysis that I suggested or the hierarchical clustering (related) suggested by reviewer 3 as alternatives or robustness checks. MCA, while performed adequately, is not well suited to the way they discuss their results. They continually refer to "types" of respondents, which is what latent class analysis is for. MCA is about identifying clustering of variables, not clusters of respondents. All of their interpretation of results is about clustering and patterns of PEOPLE, not variables. This indicates a significant misalignment between the method and the research goals.**

*A-C Dalcq: First, we would like to thank you for the deep reading done on this article and for your formulated comments. We missed your request to test the robustness of our method with other ones. We apologize for this mistake. You will find our work of comparison with LCA method in the first part of this letter. In the article, we speak about producers tending towards "GBI" or "LBE" models to express the results coming from the use of our gradient. Indeed, MCA is a method to identify relationships between variables but is also suitable to make groups of individuals thanks to the use of its extension HCPC, as proposed by the academic editor. A detailed information about the comparison of MCA and LCA is now given in the first part of this letter.*

**The authors do not adequately discuss the two dimensions of the MCA (figure 1) and the axes are not adequately labeled. It is not made clear why the second dimension is retained.**

*A-C Dalcq: We added some information. The updated explanations of the two dimensions are taken up just after (Lines 254-261/286-306/339-343). Do you need more information? If it is the case, could you guide us?*

Remark : Lines specified throughout this letter are those of the revised manuscript with track changes.

The axes are labeled as the figure is provided by SAS 9.4. We precised its meaning thanks to the caption and the following interpretation.

Explanations of the two dimensions:

Lines 254-261: *“The first dimension of MCA showed positive relationships with the modalities no opinion of each characteristic and negative relationships with all the modalities representing an opinion. Thus, the first dimension of the MCA allowed ~~permitted~~ differentiation between the producers who did not give their opinion concerning characteristics of IFF and the producers who did (Fig 1). Cluster analysis was used to isolate the group of producers with a lot of ‘no opinion’ answers to the seven questions: this formed the first separation of classes of the analysis, dividing the “no-opinion” producers (15%) from the others (85%).”*

Lines 286-306: *“The second dimension of the MCA showed positive relationships with some modalities of the IFF characteristic and negative relationships with their opposite. Thus, this dimension seems ~~was~~ ~~the most interesting for highlighting~~ to highlight the wishes of dairy farmers about their IFF, for those who took a position on this question. More precisely, this axis showed a gradation of question modalities and proximity between several characteristics. This dimension led to the identification of two extreme tendencies (Fig 1); the modalities of familial workforce, independent farmer management and management by a group of farmers were near to zero on this axis (Fig 1). This means that the small proportion of producers supporting group management was distributed between the two extreme tendencies observed. The position of the modalities of familial workforce and independent farmer at the middle of the second dimension illustrated the fact that these modalities were chosen by producers from the two tendencies identified. The small proportion of producers choosing an employed workforce was positioned at the top of the second dimension (Fig 1).”*

*“The first tendency, related to high scores on the second MCA dimension, corresponds to IFF with the following characteristics: global market, standard milk, intensive system, employed workforce, specialised and strongly based on new technologies.”*

Lines 339-343: *“The second tendency, contrary to the first tendency, was characterised by negative scores on the second MCA dimension. This axis was represented by the following modalities: weakly based on new technologies, diversified, differentiated quality milk, local market and extensive system (Fig 1). This reflects another form of dairy farming. »*

Reason of the use of the second dimension:

Lines 379-384: *“To study the relationships between the different IFF, the reasons for these and other interesting technico-economic information, the second dimension was considered as a gradient (**IFFg**) interpreted at the extremities as global-based intensive producers (GBI: high positive scores) and local-based extensive producers (LBE: high negative scores). The choice to work with a gradient rather than a clear separation of the two tendencies was motivated by the will to not put dairy producers into boxes ~~pigeonholes~~”*

**While the authors have provided a link to the survey online, that link is only in French and requires registration with an email address before it can be viewed, so that is not adequate. The authors still have not addressed the real concern that I raised in my previous review: they need to be clear about how they measured their concepts (intensive/extensive, etc.), what specific survey questions were used, and how those variables were coded. A clear list of questions for each concept and the coding**

**for each is needed. For instance, in Table 2, it is not clear what specific survey questions or variables represent these concepts and how those variables were actually coded.**

*A-C Dalcq: In the current version, we have added an annex (Appendix 1) with the translation of the questions mobilized in the paper. Given the length of the survey, we provided only the questions raised in the present paper. Some information are mentioned at lines 129-136 about the questions related to the ideal future farm characteristics (intensive vs. extensive,...), the way of measurement for our developed concepts. If you need more information, could you precise them to us explicitly ?*

*Lines 129-136: "The entire survey was composed of 127 questions where the answers were decomposed into 498 categorical and 44 quantitative variables. The question 'Without taking into account your current farm, what is, according to you, the ideal future farm to ensure a revenue?' was proposed to the producers and they must ~~could~~ choose between short propositions on seven items: 1) intensive or extensive production; 2) specialised or. diversified activity (or activities); 3) farming strongly or weakly based on new technologies; 4) farm managed by an independent farmer or a group of managers; 5) family or employed workforce; 6) providing production for local or global markets; 7) providing standard or differentiated quality production. The modality "no opinion" was available for each IFF question."*

**The authors still do not address response rate for the survey. They do now address representativeness of their respondents for this specific region, but they have not addressed the bigger questions of representativeness: how does this one region in one nation represent that nation, Europe, and/or agriculture broadly?**

*A-C Dalcq: The response rate of 6,1% was already precised in the past manuscript. You can find it at lines 200-201 of the current text.*

*Lines 200-201 : "The sample set of 245 producers represented 6.1% of the dairy producers in Wallonia (about 4,000 dairy producers in 2015 and 3,500 in 2017 (STATBEL, 2019))."*

*For the second part of your comment, do you want that we precise that the Walloon Region is one of the two regions of Belgium, which is one of the 27 members countries of the European Union? If yes, the proposal could be : "The Walloon Region is one of the two regions of Belgium, which is one of the 27 members countries of the European Union".*

*Or do you want that we precise the number of dairy producers in Belgium and in the European Union? The International Dairy Federation mentions 9,674 dairy farms in Belgium and 1,130,700 farms with a dairy activity in the European Union (Confédération Belge de l'Industrie Laitière, 2020). The number of Walloon dairy farms is obviously low amongst all of these countries. We do not know if all this information is relevant to be written in the manuscript.*

*Complete reference: Confédération Belge de l'Industrie Laitière. 2020. Rapport Annuel 2020.*

*The goal of this paper is to inform about the position of dairy producers of a region, which is moreover quite heterogeneous regarding the geopedologic conditions (lines 205-206), this one can represent the context and the resources of other producers in Europe. The goal was not to give a complete vision of all the European producers, which needs higher means.*

**In all tables the n, or respondent totals, should be clear.**

*A-C Dalcq: We added a sentence at lines 395-396 :“These analysis were conducted on the producers who have an opinion (N = 207).” And the N was precised and added in each table. Thanks for this remark which brings clarity throughout all the paper.*

**For Table 5 there are subscripts/footnotes that are never defined or labeled.**

*A-C Dalcq: The subscripts are now precised in each table. “Means with different letters are significantly different.”. Thanks for this remark.*

**For Tables 3 and 4, no significance tests are reported.**

*A-C Dalcq: Indeed, the goal was not to test the differences between the no-opinion producers and all the sample but to give an idea of the characteristics of the No-opinion producers. Reviewer#3 asked us to give all of this information also for producers with an opinion. We realized ANOVA tests between the no-opinion producers and the producers with an opinion (lines 280-284)*

**The interpretation of the MCA results is circular logic. They define the clusters based on variables such as the attitude toward technology and then present a finding that people who are in the “pro-technology” GBI cluster have more positive attitudes towards technology. Of course, that is how you defined the scale in the first place.**

*A-C Dalcq: The variable “technology” is “Mechanisation and robotisation : help for workload and administrative aspects “ and is present in the part “Reasons”. This result is presented to explain one reason of the producers tending towards “GBI-model” to tend to this model and one of its component, the technology. We have better precised our idea by adding the sentence: “We observed that the wish of technology of producers tending towards GBI model can be explained by the fact that they considered it as help for workload.” at lines 534-536.*

**Regarding writing, the presentations of results and its mixing with discussion of existing literature is still extremely unclear and difficult to follow. Both reviewer 1 and myself raised this critique: presenting your results intermingled with other literature is difficult to read and makes it unclear what your key findings are. This is not about the technical requirements of the journal. In its current presentation, readers cannot easily identify what your key findings are in each subsection and it is very difficult to read. For instance, in the section on pages 15-16, the authors spend substantially more time discussing other studies than they do their own results.**

*A-C Dalcq: As already mentioned and visible at lines 304-364 in the revised paper, the explanations based on the findings of other past studies help to explain the relationships observed between the modalities of the seven ideal future farm characteristics.*

**The introduction is improved, but still weak. The first paragraph is overly general and does nothing to build the focus of the paper. The authors also spend too much time asserting the contribution of their study before they have even reviewed the literature or told us what their analysis will be.**

*A-C Dalcq: What could be your expectations about the structure of this introduction? As the reviewer#3 did not make comments about the redaction of this part and without deeper expectations from your, the structure of the introduction was not changed.*

**The attempts to incorporate new literature are cursory.**

*A-C Dalcq: The work of Mr Mooney was consulted and two references was added to the paper (lines 236-238, lines 577-580). Did you expect references to more elements of his work? Could you precise which ones? Moreover, we also investigated the phenomenon of bifurcation. Literature about bifurcation was mainly found for the organic activity. We consulted a Professor with skills in sociology, Prof Kevin Maréchal, of Gembloux Agro-Bio Tech-University of Liège (Belgium), who provided us also this literature reference. Do you have other literature to advice to me?*

**The paper is not appropriately written for a general audience. They assume too much prior knowledge from readers regarding methods both methods and the case.**

*A-C Dalcq: We have now added information about the choice of the method between MCA and LCA, and about the method WARD (regarding a following remark). We hope that it brings the missing information. If this information is not complete for you, could you precise us explicitly the requested information?*

*Lines 165-170: "This method was chosen instead of the creation of classes, possible with the Latent Class Analysis method or the Numerical Classification on the scores of MCA (Hierarchical Clustering on Principal Components). This choice was motivated by the wish to not put the producers in boxes but study their position on a gradient between potential extreme models identified along the dimension."*  
*Lines 153-156 : "The WARD method is a hierarchical agglomerative method (Everitt et al., 2011). The principle of this kind of method is to put initially the  $n$  individuals in  $n$  groups and then to agglomerate the groups. The algorithm of WARD makes it in such a way that the gatherings induce the lowest decrease of  $R^2$  at each step."*

**Overall, the authors have inadequately addressed the careful feedback of the reviewers and made inadequate improvements. Throughout the response to reviewers they reject several important critiques with no justification of their rejection.**

*A-C Dalcq: We recognized that we do not explain the choice of the method and we do not test its robustness with statistic treatments. We apologized for that. We missed this request. We realized this analysis at this time.*

**A number of specific points are highlighted below:**

**Line 79- How was that ensured (respondent producers were asked not to take into account their current farm when considering their IFF)?**

*A-C Dalcq: It is now precised in the Materials and methods section (Lines 131-134). Thanks for your remark.*

*Lines 131-134 : The question "Without taking into account your current farm, what is, according to you, the ideal future farm to ensure a revenue?" was proposed to the producers and they must choose between short propositions on seven items: 1) intensive or extensive production; 2)[...]"*

**Line 121- survey link not accessible without registering. Include in appendix?**

*A-C Dalcq: The appendix is realized and available in the new submission.*

**Line 146- What is WARD?**

*A-C Dalcq: We added sentences of explanation about the Ward method at lines 153-156. It is a hierarchical agglomerative method of Numerical classification.*

*Lines 153-156: "The WARD method is a hierarchical agglomerative method (19). The principle of this kind of method is to put initially the  $n$  individuals in  $n$  groups and then to agglomerate the groups. The algorithm of WARD makes it in such a way that the gatherings induce the lowest decrease of  $R^2$  at each step."*

**Line 145- What are "particular characteristics" beyond no-opinion profiles?**

*A-C Dalcq: We replaced particular by "some" (Lines 151). We hope it makes it clearer.*

**Line 157- What?**

*A-C Dalcq: This sentence is a part of the method. As explained and precised before, we realized a MCA on the seven ideal future farm questions. We observed that the modalities "no-opinion" of the seven questions gathered and were positively related with the first dimension of the MCA. All the modalities reflecting an opinion were negatively related to the first dimension. Thus, the first dimension allowed to differentiate the producers with an opinion or not.*

*The modalities "intensive", "global-market", "specialized", "standard quality milk", "employed workforce" and "strongly based on new technologies" gathered and were positively related to the second dimension. The modalities "extensive", "local-market", "diversified", "quality differentiated milk" and "lowly based on new technologies" gathered and were negatively related to the second dimension. The second dimension appeared to us as a gradient between the two extreme models of ideal future farm "Global-based intensive" and "Local-based extensive".*

*The two dimensions explained almost 95% of the variability of the dataset. Therefore, the study of only these two dimensions appeared to us relevant. Then, we realized a numerical classification on the scores on the two dimensions of the MCA (statistic treatment equivalent to HCPC- Hierarchical Clustering on Principal Components). The first two groups created were the "no-opinion" producers and the producers "with an opinion". This allowed us to exclude the "no-opinion" producers and to study the producers with an opinion thanks to the second dimension, this one had at its extremities the "Local-based extensive model" and the "Global-based intensive model". But the producers with an opinion distributed themselves along this dimension. Thus, we decide to work with the second dimension, as a gradient of ideal future farm (Fig 5).*

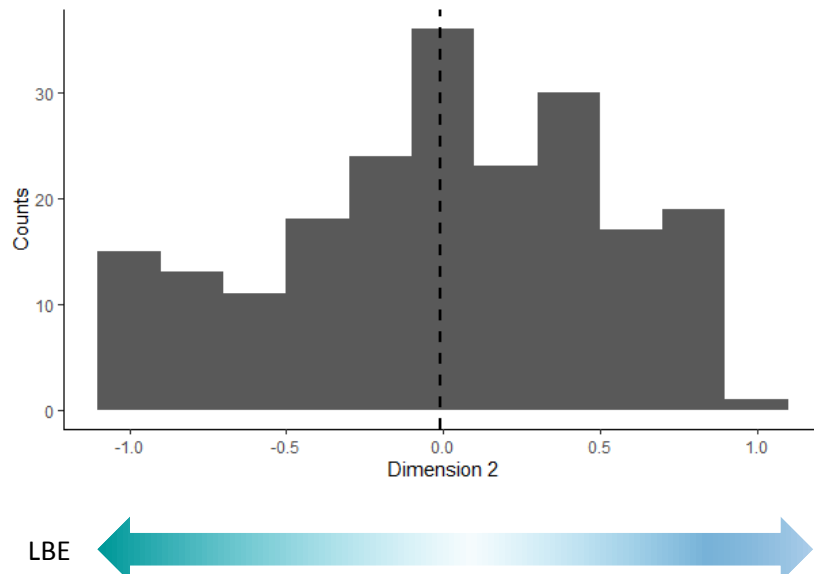

Figure 5 Distribution of the producers with an opinion along the second MCA dimension (N = 207)

Then we want to study the relationships between this ideal future farm gradient and the other information present in the survey.

The relationships between the ideal future farm gradient and the categorical variables of the survey were studied thanks to generalized linear models.

The gradient was the  $y$ , the variable to explain. The modalities of the categorical variables were the fixed effect of the generalized linear model, the factors explaining.

$$y = \text{effect} + \text{residual}$$

Where  $y$  was a vector contained the score on the ideal future farm gradient (the second dimension of MCA); effect was the qualitative variables of the survey. In other words, the model was :

$$\text{Ideal future farm gradient} = \text{categorical variable} + e$$

To study the relationships between the gradient and the quantitative variables of the survey, correlation coefficients and their level of significance were calculated.

### Line 160- What are the quantitative variables?

A-C Dalcq: Quantitative is a statistical term defining a continuous numerical variable. Do you want that we use the term « numerical » ? But this term is less precise as it does not reflect the continuous dimension of the variable.

### Table 1- What are the ns? Maybe a total figure? Percentages?

A-C Dalcq: Absolute frequencies named counts. We precised at lines 186 and 194: “Absolute frequencies (counts)”.

## How many questions in each dimension?

A-C Dalcq: One question. We have now mentioned that in the Materials and methods section at Lines 187-188: “and of the answer to the question which corresponds to this corresponding characteristic for the current situation”.

## Line 180- specifics of response rate still missing.

A-C Dalcq: The response rate is 6,1% (Line 200). Which supplementary indication do you need? We gave you numbers of farms with a dairy activity in Belgium and in European Union in this letter. We give also more information about the conditions where the survey was communicated to the producers to give you an idea of the way of proceeding. More information is given at lines 120-126.

Lines 120-126: “We communicated with Walloon dairy producers about the goals of the survey and its access broadly via all communication ways towards them : specialised press, agricultural internet websites, Unions and also advertisements through the milk payment letter which is sent to all the Walloon dairy producers once a month. The survey written in French can be viewed at the following internet link: <https://www.gembloux.ulg.ac.be/enquete/index.php/219425?lang=fr> and its English translation is viewable in the Appendix“

## Table 2- list questions?

We have added the question in the table (Line 223).

| Question                                                                                                              | Proposition            | Percentage (%) |
|-----------------------------------------------------------------------------------------------------------------------|------------------------|----------------|
| Without taking into account your current farm, what is, according to you, the ideal future farm to ensure a revenue?* | Intensive              | 43             |
|                                                                                                                       | Extensive              | 30             |
|                                                                                                                       | No opinion             | 27             |
| Specialised vs. diversified                                                                                           | Specialised            | 43             |
|                                                                                                                       | Diversified            | 47             |
|                                                                                                                       | No opinion             | 10             |
| Strongly vs. weakly based on new technologies                                                                         | Strongly               | 35             |
|                                                                                                                       | Weakly                 | 41             |
|                                                                                                                       | No opinion             | 24             |
| Managed by an independent farmer vs. a group of managers                                                              | Independent farmer     | 72             |
|                                                                                                                       | Group of managers      | 18             |
|                                                                                                                       | No opinion             | 10             |
| Family vs. employed workforce                                                                                         | Family                 | 87             |
|                                                                                                                       | Employed               | 5              |
|                                                                                                                       | No opinion             | 8              |
| Providing dairy production for local vs. global market                                                                | Global                 | 43             |
|                                                                                                                       | Local                  | 32             |
|                                                                                                                       | No opinion             | 25             |
| Providing standard vs. differentiated quality dairy production                                                        | Standard               | 38             |
|                                                                                                                       | Differentiated quality | 45             |
|                                                                                                                       | No opinion             | 17             |

## Totals

A-C Dalcq: It is now mentioned at line 223.

### Figure 1 define dimensions. What are the percentages in the axes labels?

A-C Dalcq: The percentages in the axes labels are the inertia but these ones underestimated the part of information explained by the dimensions. The corrected inertia values were calculated. This is explained in the Materials and methods section at lines 142-146: "For a MCA, the eigenvalue of the dimensions generated, named principal inertia, is a biased measure of the amount of information presented by a dimension (Palm, 2007). Corrected inertia rates were calculated, as described by Benzécri (Benzécri, 1979), to quantify the correct proportion of information of a dimension."

The corrected values of inertia are presented at lines 248-250. The nature of the values are precised in the caption of the figure (lines 251-253).

"The percentage of principal inertia of the dimensions 1 and 2 of MCA were 16.75% and 12.38%, respectively (Fig 1). The value of corrected inertia for the two first dimensions reached 72.7% and 21.5% respectively, gathering almost 95% of the information.

Fig 1. Representation of the modalities in the multiple correspondence analysis first factorial plan. Values of principal inertia reached 16.75% and 12.38%. Values of corrected inertia reached 72.7% and 21.5%."

The correction of Benzécri is made following this calculation:

$$\text{corrected inertia} = \left(\frac{s}{s-1}\right)^2 * \left(\mu_k - \frac{1}{s}\right)^2 \text{ with } \mu_k > \frac{1}{s}$$

$s$  = number of categorical variables in the MCA

$\mu_k$  = eigenvalue of the dimension

(0.33508 and 0.2475, eigenvalues of respectively the first and second dimension of the present MCA)

The corrected inertia gives a better appreciation of the amount of information explained by each dimension (Benzécri, 1979), than the inertia automatically provided by the software.

We did not think necessary to precise this in the paper but we provide the reference where this calculation is presented.

### Line 335- where is this figure reference from

A-C Dalcq : We did not provide a representation of the distribution of the producers along the second dimension, we did not think it was necessary as we provided the percentages and this figure would lengthen the paper. But following your request, we have now added this figure in the present manuscript (Lines 376-377).

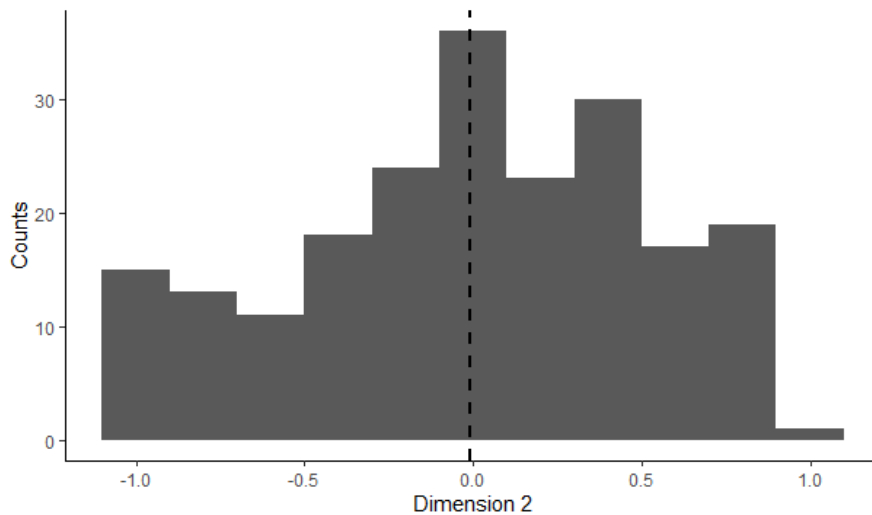

Fig 2. Distribution of the producers along the second dimension (the dotted line represents the mean score on the second dimension of the producers)(N = 207)

#### Table 5-footnotes? Which is LBI and which GBI

*A-C Dalcq : We were not sure about the goal of your question. We precised the function of the letters a and b. Concerning your request about the LBE and GBI, as explained with more details in the point 1/, the analysis is not done between groups LBE or GBI and the variables present in the survey but between an ideal future farm gradient and the variables present in the survey. The means presented in the tables 5, 7 and 8 are the mean value of this gradient for the different modalities of the categorical variables. We explained this at lines 390-395.*

*Lines 390-395: "Tables 5, 7 and 8 give the results of generalised linear models where the categorical variables were introduced separately as a fixed effect in the model. Significantly lower estimates of IFFg for a specific modality of the considered categorical variable depicts a tendency of producers desiring a LBE model to choose this modality, while significantly higher estimates of IFFg means a tendency of producers wanting a GBI model to choose this modality."*

#### What test is used here?

*A-C Dalcq: Generalised linear models were used to study the level of significance of the differences between the means values of the gradient of the modalities of categorical variables: y was the ideal future farm gradient and the effect included in the model was the categorical variable. We explained this part of the method in the Materials and methods section at lines 178-184.*

*Lines 178-184: "For categorical variables, the scores of MCA dimensions were modelled using these variables as a fixed effect in a generalised linear model. Least squares means were estimated for the two-by-two comparisons using the Tukey test. The level of significance of those differences was assessed based on the P-value of the test. For quantitative variables, Pearson correlation coefficients were calculated between the scores of MCA dimensions and these variables. Their corresponding P-values were estimated to observe if the correlation values were significantly different from 0."*

**Line 356 explain what they mean by introduced as fixed effect**

*A-C Dalcq: As explained in the point 1/ of this letter, the gradient was used as y (variable to be explained) of the generalized linear models and the fixed effect introduced in the generalized linear model was the categorical variables. See the previous answer related to the same topic for more details.*

**Line 620- What is SFI**

*A-C Dalcq : We precised this at line 661. "SFI = study, formation and information ». It is after the table. We have now added an asterisk to highlight the explanation of this abbreviation.*

**Reviewer #3: Thanks to the authors, ho made significant improvements to the paper. The full potential of the data is now revealed in the analysis. I particularly appreciate the improvements on the description of the « no-opinion » farmers, as suggested in my first review.**

*A-C Dalcq: Thank you for the interest given to this study.*

**Specific comments:**

**84: add references to « This change implied the disappearance of regulation of dairy supplies and caused volatility and decrease in the milk price »**

*A-C Dalcq: We added a reference and precised our purpose (Lines 83-84). Thanks for your remark.*

*Lines 83-84: "This change implied the disappearance of regulation of dairy supplies and was bringing uncertainty about the milk price (16). ~~caused volatility and decrease in the milk price.~~ "*

*Reference 16: Salou, T., H.M.G. van der Werf, F. Levert, A. Forslund, J. Hercule, and C. Le Mouël. 2017. Could EU dairy quota removal favour some dairy production systems over others? The case of French dairy production systems. *Agric. Syst.* 153:1–10. doi:10.1016/j.agsy.2017.01.004.*

**99-100: the question #2 is unclear. « What is the proportion of producers desiring the different IFF? » should be rephrased a bit maybe. The expression « the different IFF » will be vague for the readers. Is the IFF always different from the current farm ? And I guess « their IFF » is more thuitable thant « the IFF » as each respondent will provide a personal definition of their IFF.**

*A-C Dalcq: We understand your will to make this question clearer. We have replaced it by « How the dairy producers distribute themselves between IFF highlighted ?" (Lines 100-101, lines 365-366).*

**122: you do not answer to another reviewer's comment, who wanted to know the response rate to the interview. To how many farmers was this survey submitted ? e.g. number of farmers buying the « specialised press », number of advertisements sent with the milk payment letter etc.**

*A-C Dalcq: We precised in the text that all the Walloon dairy producers received this payment letter: +/- 4,000 producers. Therefore, the 245 respondents correspond to 6,1% of the population, i.e. the response rate. We added information at lines 120-126 & 200-201. We do not know if the information number of farmers buying the « specialised press », number of advertisements sent with the milk payment letter are necessary in this paper but we added information to give an idea of the conditions in which the survey was communicated.*

Lines 120-126: *“We communicated with Walloon dairy producers about the goals of the survey and its access broadly via all communication ways towards them : specialised press, agricultural internet websites, Unions and also advertisements through the milk payment letter which is sent to all the Walloon dairy producers once a month. The survey written in French can be viewed at the following internet link: <https://www.gembloux.ulq.ac.be/enquete/index.php/219425?lang=fr> and its English translation is viewable in the Appendix.*

*A total of 245 producers completed our survey between November 2014 and January 2015.”*

Lines 200-201: *“The sample set of 245 producers represented 6.1% of the dairy producers in Wallonia (about 4,000 dairy producers in 2015 and 3,500 in 2017 (STATBEL, 2019).”*

**240:253 : the description of the no-opinion farmers adds value to the data analysis. However I am not sure that the last sentence is useful. This is your personal interpretation, but the data do not permit to reveal it.**

*A-C Dalcq: Indeed, this sentence was deleted (Line 279). Thanks for your remark.*

**Tables 3 and 4: you have two columns, which are « complete sample » and « no-opinion farmers ». A third column which reflects the sample excluding the no-opinion farmers will permit the reader to compare the no-opinion ones with the others.**

*A-C Dalcq: Indeed, this column was added (Lines 280, 283). And, as asked by reviewer#2, we realized (1) generalized linear models to compare the means of the quantitative variables between the no-opinion producers and producers with an opinion and (2) tests of proportion to compare the proportion of each modalities of the categorical variables between the no-opinion producers and producers with an opinion. We added description of these statistical treatments in the Materials and Methods section (Lines 157-160).*

**333 : as already said, I think this title is not well written and could be more explicit.**

*A-C Dalcq: It was changed at lines 365-366. See also the answer to your previous comment related to the same topic.*

**350 : pigeonholes. Could you be more precise?**

*A-C Dalcq: As it caused doubt in your comprehension of this idea, we replaced by boxes (Line 384).*

⇒ *Put people (here dairy producers) in boxes.*

*It was used to explain the fact to put a label of someone. But in this paper, we want to nuance the position of the producer regarding its ideal future farm.*
